# Supplementary material for: Atmospheric chemosynthesis is phylogenetically and geographically widespread and contributes significantly to carbon fixation throughout cold deserts
Source: Research Square preprint supplement (doi:10.21203/rs.3.rs-948000/v1), 2021-10-13
Supplement: Supplementary file 3 [file 1f0e95be7b930541fb16637e.xlsx]

## Sheet: Sheet1
					Bin # and Genome ID
					46	197	180	193	44	45	74	124	131	199	215	75	187	210	16	201	90	102	73	30	181	151	176	66	34	88	106	200	177	175	146	87	139	28	148	222	179	92	69	141	48	64	82	110	105
Primary Metabolic interest	Sub-metabolic interest	Annotation	Gene	KO	TR1_14	TR1_13	TR1_10	TR1_15	TR1_18	TR1_1	TR1_21	TR1_23	TR1_25	TR1_27	TR1_29	TR1_30	TR1_34	TR1_3	TR1_4	TR1_5	TR1_8	TR1_9	TR2_10	TR2_12	TR2_13	TR2_16	TR2_1	TR2_20	TR2_22	TR2_23	TR2_26	TR2_2	TR2_3	TR2_4	TR2_5	TR2_6	TR2_7	TR2_8	TR2_9	TR3_10	TR3_11	TR3_12	TR3_13	TR3_14	TR3_16	TR3_17	TR3_19	TR3_1	TR3_20
Photosynthesis	Photosynthetic reaction centre	pscA	photosystem P840 reaction center large subunit	K08940	0	0	0	0	0	0	0	0	0	0	0	0	0	0	0	0	0	0	0	0	0	0	0	0	0	0	0	0	0	0	0	0	0	0	0	0	0	0	0	0	0	0	0	0	0
Photosynthesis	Photosynthetic reaction centre	pscB	photosystem P840 reaction center iron-sulfur protein	K08941	0	0	0	0	0	0	0	0	0	0	0	0	0	0	0	0	0	0	0	0	0	0	0	0	0	0	0	0	0	0	0	0	0	0	0	0	0	0	0	0	0	0	0	0	0
Photosynthesis	Photosynthetic reaction centre	pscC	photosystem P840 reaction center cytochrome c551	K08942	0	0	0	0	0	0	0	0	0	0	0	0	0	0	0	0	0	0	0	0	0	0	0	0	0	0	0	0	0	0	0	0	0	0	0	0	0	0	0	0	0	0	0	0	0
Photosynthesis	Photosynthetic reaction centre	pscD	photosystem P840 reaction center protein PscD	K08943	0	0	0	0	0	0	0	0	0	0	0	0	0	0	0	0	0	0	0	0	0	0	0	0	0	0	0	0	0	0	0	0	0	0	0	0	0	0	0	0	0	0	0	0	0
Photosynthesis	Photosynthetic reaction centre	pufL	photosynthetic reaction center L subunit	K08928	0	0	0	0	0	0	0	0	0	0	0	0	0	0	0	0	0	0	0	0	0	0	0	0	0	0	0	0	0	0	0	0	0	0	0	0	0	0	0	0	0	0	0	0	0
Photosynthesis	Photosynthetic reaction centre	pufM	photosynthetic reaction center M subunit	K08929	0	0	0	0	0	0	0	0	0	0	0	0	0	0	0	0	0	0	0	0	0	0	0	0	0	0	0	0	0	0	0	0	0	0	0	0	0	0	0	0	0	0	0	0	0
Photosynthesis	Photosynthetic reaction centre	pufC	photosynthetic reaction center cytochrome c subunit	K13992	0	0	0	0	0	0	0	0	0	0	0	0	0	0	0	0	0	0	0	0	0	0	0	0	0	0	0	0	0	0	0	0	0	0	0	0	0	0	0	0	0	0	0	0	0
Photosynthesis	Photosynthetic reaction centre	pufB	light-harvesting complex 1 beta chain	K08927	0	0	0	0	0	0	0	0	0	0	0	0	0	0	0	0	0	0	0	0	0	0	0	0	0	0	0	0	0	0	0	0	0	0	0	0	0	0	0	0	0	0	0	0	0
Photosynthesis	Photosynthetic reaction centre	pufX	photosynthetic reaction center PufX protein	K13994	0	0	0	0	0	0	0	0	0	0	0	0	0	0	0	0	0	0	0	0	0	0	0	0	0	0	0	0	0	0	0	0	0	0	0	0	0	0	0	0	0	0	0	0	0
Photosynthesis	Photosynthetic reaction centre	pufA	light-harvesting complex 1 alpha chain	K08926	0	0	0	0	0	0	0	0	0	0	0	0	0	0	0	0	0	0	0	0	0	0	0	0	0	0	0	0	0	0	0	0	0	0	0	0	0	0	0	0	0	0	0	0	0
Photosynthesis	Chlorosome-related proteins	CsmA	chlorosome envelope protein A	K08945	0	0	0	0	0	0	0	0	0	0	0	0	0	0	0	0	0	0	0	0	0	0	0	0	0	0	0	0	0	0	0	0	0	0	0	0	0	0	0	0	0	0	0	0	0
Photosynthesis	Chlorosome-related proteins	CsmB	chlorosome envelope protein B	K08946	0	0	0	0	0	0	0	0	0	0	0	0	0	0	0	0	0	0	0	0	0	0	0	0	0	0	0	0	0	0	0	0	0	0	0	0	0	0	0	0	0	0	0	0	0
Photosynthesis	Chlorosome-related proteins	CsmC	chlorosome envelope protein C	K08947	0	0	0	0	0	0	0	0	0	0	0	0	0	0	0	0	0	0	0	0	0	0	0	0	0	0	0	0	0	0	0	0	0	0	0	0	0	0	0	0	0	0	0	0	0
Photosynthesis	Chlorosome-related proteins	csmD	chlorosome envelope protein D	K08948	0	0	0	0	0	0	0	0	0	0	0	0	0	0	0	0	0	0	0	0	0	0	0	0	0	0	0	0	0	0	0	0	0	0	0	0	0	0	0	0	0	0	0	0	0
Photosynthesis	Chlorosome-related proteins	csmE	chlorosome envelope protein E	K08949	0	0	0	0	0	0	0	0	0	0	0	0	0	0	0	0	0	0	0	0	0	0	0	0	0	0	0	0	0	0	0	0	0	0	0	0	0	0	0	0	0	0	0	0	0
Photosynthesis	Chlorosome-related proteins	csmF	chlorosome envelope protein F	K08950	0	0	0	0	0	0	0	0	0	0	0	0	0	0	0	0	0	0	0	0	0	0	0	0	0	0	0	0	0	0	0	0	0	0	0	0	0	0	0	0	0	0	0	0	0
Photosynthesis	Chlorosome-related proteins	csmH	chlorosome envelope protein H	K08951	0	0	0	0	0	0	0	0	0	0	0	0	0	0	0	0	0	0	0	0	0	0	0	0	0	0	0	0	0	0	0	0	0	0	0	0	0	0	0	0	0	0	0	0	0
Photosynthesis	Chlorosome-related proteins	csmI	chlorosome envelope protein I	K08952	0	0	0	0	0	0	0	0	0	0	0	0	0	0	0	0	0	0	0	0	0	0	0	0	0	0	0	0	0	0	0	0	0	0	0	0	0	0	0	0	0	0	0	0	0
Photosynthesis	Chlorosome-related proteins	CsmJ	chlorosome envelope protein J	K08953	0	0	0	0	0	0	0	0	0	0	0	0	0	0	0	0	0	0	0	0	0	0	0	0	0	0	0	0	0	0	0	0	0	0	0	0	0	0	0	0	0	0	0	0	0
Photosynthesis	Chlorosome-related proteins	csmX	chlorosome envelope protein X	K08954	0	0	0	0	0	0	0	0	0	0	0	0	0	0	0	0	0	0	0	0	0	0	0	0	0	0	0	0	0	0	0	0	0	0	0	0	0	0	0	0	0	0	0	0	0
Photosynthesis	Photosystem II	psbA	photosystem II P680 reaction center D1 protein	K02703	0	0	0	0	0	0	0	0	0	0	0	0	0	0	0	0	0	0	0	0	0	0	0	0	0	0	0	0	0	0	0	0	0	0	0	0	0	0	0	0	0	0	0	0	0
Photosynthesis	Photosystem II	psbB	photosystem II CP47 chlorophyll apoprotein	K02704	0	0	0	0	0	0	0	0	0	0	0	0	0	0	0	0	0	0	0	0	0	0	0	0	0	0	0	0	0	0	0	0	0	0	0	0	0	0	0	0	0	0	0	0	0
Photosynthesis	Photosystem II	psbC	photosystem II CP43 chlorophyll apoprotein	K02705	0	0	0	0	0	0	0	0	0	0	0	0	0	0	0	0	0	0	0	0	0	0	0	0	0	0	0	0	0	0	0	0	0	0	0	0	0	0	0	0	0	0	0	0	0
Photosynthesis	Photosystem II	psbD	photosystem II P680 reaction center D2 protein	K02706	0	0	0	0	0	0	0	0	0	0	0	0	0	0	0	0	0	0	0	0	0	0	0	0	0	0	0	0	0	0	0	0	0	0	0	0	0	0	0	0	0	0	0	0	0
Photosynthesis	Photosystem II	psbE	photosystem II cytochrome b559 subunit alpha	K02707	0	0	0	0	0	0	0	0	0	0	0	0	0	0	0	0	0	0	0	0	0	0	0	0	0	0	0	0	0	0	0	0	0	0	0	0	0	0	0	0	0	0	0	0	0
Photosynthesis	Photosystem II	psbF	photosystem II cytochrome b559 subunit beta	K02708	0	0	0	0	0	0	0	0	0	0	0	0	0	0	0	0	0	0	0	0	0	0	0	0	0	0	0	0	0	0	0	0	0	0	0	0	0	0	0	0	0	0	0	0	0
Photosynthesis	Photosystem II	psbH	photosystem II PsbH protein	K02709	0	0	0	0	0	0	0	0	0	0	0	0	0	0	0	0	0	0	0	0	0	0	0	0	0	0	0	0	0	0	0	0	0	0	0	0	0	0	0	0	0	0	0	0	0
Photosynthesis	Photosystem II	psbI	photosystem II PsbI protein	K02710	0	0	0	0	0	0	0	0	0	0	0	0	0	0	0	0	0	0	0	0	0	0	0	0	0	0	0	0	0	0	0	0	0	0	0	0	0	0	0	0	0	0	0	0	0
Photosynthesis	Photosystem II	psbJ	photosystem II PsbJ protein	K02711	0	0	0	0	0	0	0	0	0	0	0	0	0	0	0	0	0	0	0	0	0	0	0	0	0	0	0	0	0	0	0	0	0	0	0	0	0	0	0	0	0	0	0	0	0
Photosynthesis	Photosystem II	psbK	photosystem II PsbK protein	K02712	0	0	0	0	0	0	0	0	0	0	0	0	0	0	0	0	0	0	0	0	0	0	0	0	0	0	0	0	0	0	0	0	0	0	0	0	0	0	0	0	0	0	0	0	0
Photosynthesis	Photosystem II	psbL	photosystem II PsbL protein	K02713	0	0	0	0	0	0	0	0	0	0	0	0	0	0	0	0	0	0	0	0	0	0	0	0	0	0	0	0	0	0	0	0	0	0	0	0	0	0	0	0	0	0	0	0	0
Photosynthesis	Photosystem II	psbM	photosystem II PsbM protein	K02714	0	0	0	0	0	0	0	0	0	0	0	0	0	0	0	0	0	0	0	0	0	0	0	0	0	0	0	0	0	0	0	0	0	0	0	0	0	0	0	0	0	0	0	0	0
Photosynthesis	Photosystem II	psbO	photosystem II oxygen-evolving enhancer protein 1	K02716	0	0	0	0	0	0	0	0	0	0	0	0	0	0	0	0	0	0	0	0	0	0	0	0	0	0	0	0	0	0	0	0	0	0	0	0	0	0	0	0	0	0	0	0	0
Photosynthesis	Photosystem II	psbP	photosystem II oxygen-evolving enhancer protein 2	K02717	0	0	0	0	0	0	0	0	0	0	0	0	0	0	0	0	0	0	0	0	0	0	0	0	0	0	0	0	0	0	0	0	0	0	0	0	0	0	0	0	0	0	0	0	0
Photosynthesis	Photosystem II	psbT	photosystem II PsbT protein	K02718	0	0	0	0	0	0	0	0	0	0	0	0	0	0	0	0	0	0	0	0	0	0	0	0	0	0	0	0	0	0	0	0	0	0	0	0	0	0	0	0	0	0	0	0	0
Photosynthesis	Photosystem II	psbU	photosystem II PsbU protein	K02719	0	0	0	0	0	0	0	0	0	0	0	0	0	0	0	0	0	0	0	0	0	0	0	0	0	0	0	0	0	0	0	0	0	0	0	0	0	0	0	0	0	0	0	0	0
Photosynthesis	Photosystem II	psbV	photosystem II cytochrome c550	K02720	0	0	0	0	0	0	0	0	0	0	0	0	0	0	0	0	0	0	0	0	0	0	0	0	0	0	0	0	0	0	0	0	0	0	0	0	0	0	0	0	0	0	0	0	0
Photosynthesis	Photosystem II	psbX	photosystem II PsbX protein	K02722	0	0	0	0	0	0	0	0	0	0	0	0	0	0	0	0	0	0	0	0	0	0	0	0	0	0	0	0	0	0	0	0	0	0	0	0	0	0	0	0	0	0	0	0	0
Photosynthesis	Photosystem II	psbY	photosystem II PsbY protein	K02723	0	0	0	0	0	0	0	0	0	0	0	0	0	0	0	0	0	0	0	0	0	0	0	0	0	0	0	0	0	0	0	0	0	0	0	0	0	0	0	0	0	0	0	0	0
Photosynthesis	Photosystem II	psbZ	photosystem II PsbZ protein	K02724	0	0	0	0	0	0	0	0	0	0	0	0	0	0	0	0	0	0	0	0	0	0	0	0	0	0	0	0	0	0	0	0	0	0	0	0	0	0	0	0	0	0	0	0	0
Photosynthesis	Photosystem II	psb27	photosystem II Psb27 protein	K08902	0	0	0	0	0	0	0	0	0	0	0	0	0	0	0	0	0	0	0	0	0	0	0	0	0	0	0	0	0	0	0	0	0	0	0	0	0	0	0	0	0	0	0	0	0
Photosynthesis	Photosystem II	psb28	photosystem II 13kDa protein	K08903	0	0	0	0	0	0	0	0	0	0	0	0	0	0	0	0	0	0	0	0	0	0	0	0	0	0	0	0	0	0	0	0	0	0	0	0	0	0	0	0	0	0	0	0	0
Photosynthesis	Photosystem II	psb28-2	psb28-2; photosystem II Psb28-2 protein	K08904	0	0	0	0	0	0	0	0	0	0	0	0	0	0	0	0	0	0	0	0	0	0	0	0	0	0	0	0	0	0	0	0	0	0	0	0	0	0	0	0	0	0	0	0	0
Photosynthesis	Photosystem I	psaA	photosystem I P700 chlorophyll a apoprotein A1	K02689	0	0	0	0	0	0	0	0	0	0	0	0	0	0	0	0	0	0	0	0	0	0	0	0	0	0	0	0	0	0	0	0	0	0	0	0	0	0	0	0	0	0	0	0	0
Photosynthesis	Photosystem I	psaB	photosystem I P700 chlorophyll a apoprotein A2	K02690	0	0	0	0	0	0	0	0	0	0	0	0	0	0	0	0	0	0	0	0	0	0	0	0	0	0	0	0	0	0	0	0	0	0	0	0	0	0	0	0	0	0	0	0	0
Photosynthesis	Photosystem I	psaC	photosystem I subunit VII	K02691	0	0	0	0	0	0	0	0	0	0	0	0	0	0	0	0	0	0	0	0	0	0	0	0	0	0	0	0	0	0	0	0	0	0	0	0	0	0	0	0	0	0	0	0	0
Photosynthesis	Photosystem I	psaD	photosystem I subunit II	K02692	0	0	0	0	0	0	0	0	0	0	0	0	0	0	0	0	0	0	0	0	0	0	0	0	0	0	0	0	0	0	0	0	0	0	0	0	0	0	0	0	0	0	0	0	0
Photosynthesis	Photosystem I	psaE	photosystem I subunit IV	K02693	0	0	0	0	0	0	0	0	0	0	0	0	0	0	0	0	0	0	0	0	0	0	0	0	0	0	0	0	0	0	0	0	0	0	0	0	0	0	0	0	0	0	0	0	0
Photosynthesis	Photosystem I	psaF	photosystem I subunit III	K02694	0	0	0	0	0	0	0	0	0	0	0	0	0	0	0	0	0	0	0	0	0	0	0	0	0	0	0	0	0	0	0	0	0	0	0	0	0	0	0	0	0	0	0	0	0
Photosynthesis	Photosystem I	psaI	photosystem I subunit VIII	K02696	0	0	0	0	0	0	0	0	0	0	0	0	0	0	0	0	0	0	0	0	0	0	0	0	0	0	0	0	0	0	0	0	0	0	0	0	0	0	0	0	0	0	0	0	0
Photosynthesis	Photosystem I	psaJ	photosystem I subunit IX	K02697	0	0	0	0	0	0	0	0	0	0	0	0	0	0	0	0	0	0	0	0	0	0	0	0	0	0	0	0	0	0	0	0	0	0	0	0	0	0	0	0	0	0	0	0	0
Photosynthesis	Photosystem I	psaK	photosystem I subunit X	K02698	0	0	0	0	0	0	0	0	0	0	0	0	0	0	0	0	0	0	0	0	0	0	0	0	0	0	0	0	0	0	0	0	0	0	0	0	0	0	0	0	0	0	0	0	0
Photosynthesis	Photosystem I	psaL	photosystem I subunit XI	K02699	0	0	0	0	0	0	0	0	0	0	0	0	0	0	0	0	0	0	0	0	0	0	0	0	0	0	0	0	0	0	0	0	0	0	0	0	0	0	0	0	0	0	0	0	0
Photosynthesis	Photosystem I	psaM	photosystem I subunit XII	K02700	0	0	0	0	0	0	0	0	0	0	0	0	0	0	0	0	0	0	0	0	0	0	0	0	0	0	0	0	0	0	0	0	0	0	0	0	0	0	0	0	0	0	0	0	0
Photosynthesis	Photosystem I	psaX	photosystem I 4.8kDa protein	K02702	0	0	0	0	0	0	0	0	0	0	0	0	0	0	0	0	0	0	0	0	0	0	0	0	0	0	0	0	0	0	0	0	0	0	0	0	0	0	0	0	0	0	0	0	0
Photosynthesis	Cytochrome b6/f complex	petA	apocytochrome f	K02634	0	0	0	0	0	0	0	0	0	0	0	0	0	0	0	0	0	0	0	0	0	0	0	0	0	0	0	0	0	0	0	0	0	0	0	0	0	0	0	0	0	0	0	0	0
Photosynthesis	Cytochrome b6/f complex	petB	cytochrome b6	K02635	0	0	0	0	0	0	0	0	0	0	0	0	0	0	0	0	0	0	0	0	0	0	0	0	0	0	0	0	0	0	0	0	0	0	0	0	0	0	0	0	0	0	0	0	0
Photosynthesis	Cytochrome b6/f complex	petC	cytochrome b6-f complex iron-sulfur subunit	K02636	0	0	0	0	0	0	0	0	0	0	0	0	0	0	0	0	0	0	0	0	0	0	0	0	0	0	0	0	0	0	0	0	0	1	0	0	0	0	0	0	0	0	0	0	0
Photosynthesis	Cytochrome b6/f complex	petD	cytochrome b6-f complex subunit 4	K02637	0	0	0	0	0	0	0	0	0	0	0	0	0	0	0	0	0	0	0	0	0	0	0	0	0	0	0	0	0	0	0	0	0	0	0	0	0	0	0	0	0	0	0	0	0
Photosynthesis	Cytochrome b6/f complex	petG	cytochrome b6-f complex subunit 5	K02640	0	0	0	0	0	0	0	0	0	0	0	0	0	0	0	0	0	0	0	0	0	0	0	0	0	0	0	0	0	0	0	0	0	0	0	0	0	0	0	0	0	0	0	0	0
Photosynthesis	Cytochrome b6/f complex	petL	cytochrome b6-f complex subunit 6	K02642	0	0	0	0	0	0	0	0	0	0	0	0	0	0	0	0	0	0	0	0	0	0	0	0	0	0	0	0	0	0	0	0	0	0	0	0	0	0	0	0	0	0	0	0	0
Photosynthesis	Cytochrome b6/f complex	petM	cytochrome b6-f complex subunit 7	K02643	0	0	0	0	0	0	0	0	0	0	0	0	0	0	0	0	0	0	0	0	0	0	0	0	0	0	0	0	0	0	0	0	0	0	0	0	0	0	0	0	0	0	0	0	0
Photosynthesis	Cytochrome b6/f complex	petN	cytochrome b6-f complex subunit 8	K03689	0	0	0	0	0	0	0	0	0	0	0	0	0	0	0	0	0	0	0	0	0	0	0	0	0	0	0	0	0	0	0	0	0	0	0	0	0	0	0	0	0	0	0	0	0
Photosynthesis	Photosynthetic electon transport	petE	plastocyanin	K02638	0	0	0	0	0	0	0	0	0	0	0	0	0	0	0	0	0	0	0	0	0	0	0	0	0	0	0	0	0	0	0	0	0	0	0	0	0	0	0	0	0	0	0	0	0
Photosynthesis	Photosynthetic electon transport	petF	ferredoxin	K02639	0	0	0	0	0	0	1	0	0	0	0	0	0	0	0	0	0	0	0	0	0	0	0	0	0	0	0	0	0	0	0	0	0	0	0	0	0	0	0	0	0	0	0	0	0
Photosynthesis	Photosynthetic electon transport	petH	ferredoxin--NADP+ reductase	K02641	0	0	0	0	0	0	0	0	0	0	0	0	0	0	0	0	0	0	0	0	0	0	0	0	0	0	0	0	0	0	0	0	0	0	0	0	0	0	0	0	0	0	0	0	0
Photosynthesis	Photosynthetic electon transport	petJ	cytochrome c6	K08906	0	0	0	0	0	0	0	0	0	0	0	0	0	0	0	0	0	0	0	0	0	0	0	0	0	0	0	0	0	0	0	0	0	0	0	0	0	0	0	0	0	0	0	0	0
Photosynthesis	Light-harvesting proteins	pucA	light-harvesting protein B-800-850 alpha chain	K08930	0	0	0	0	0	0	0	0	0	0	0	0	0	0	0	0	0	0	0	0	0	0	0	0	0	0	0	0	0	0	0	0	0	0	0	0	0	0	0	0	0	0	0	0	0
Photosynthesis	Light-Harvesting proteins	pucB	light-harvesting protein B-800-850 beta chain	K08939	0	0	0	0	0	0	0	0	0	0	0	0	0	0	0	0	0	0	0	0	0	0	0	0	0	0	0	0	0	0	0	0	0	0	0	0	0	0	0	0	0	0	0	0	0
Photosynthesis	Light-harvesting proteins	apcA	allophycocyanin alpha subunit	K02092	0	0	0	0	0	0	0	0	0	0	0	0	0	0	0	0	0	0	0	0	0	0	0	0	0	0	0	0	0	0	0	0	0	0	0	0	0	0	0	0	0	0	0	0	0
Photosynthesis	Light-harvesting proteins	apcB	allophycocyanin beta subunit	K02093	0	0	0	0	0	0	0	0	0	0	0	0	0	0	0	0	0	0	0	0	0	0	0	0	0	0	0	0	0	0	0	0	0	0	0	0	0	0	0	0	0	0	0	0	0
Photosynthesis	Light-harvesting proteins	apcC	phycobilisome core linker protein	K02094	0	0	0	0	0	0	0	0	0	0	0	0	0	0	0	0	0	0	0	0	0	0	0	0	0	0	0	0	0	0	0	0	0	0	0	0	0	0	0	0	0	0	0	0	0
Photosynthesis	Light-harvesting proteins	apcD	allophycocyanin-B	K02095	0	0	0	0	0	0	0	0	0	0	0	0	0	0	0	0	0	0	0	0	0	0	0	0	0	0	0	0	0	0	0	0	0	0	0	0	0	0	0	0	0	0	0	0	0
Photosynthesis	Light-harvesting proteins	apcE	phycobilisome core-membrane linker protein	K02096	0	0	0	0	0	0	0	0	0	0	0	0	0	0	0	0	0	0	0	0	0	0	0	0	0	0	0	0	0	0	0	0	0	0	0	0	0	0	0	0	0	0	0	0	0
Photosynthesis	Light-harvesting proteins	apcF	phycobilisome core component	K02097	0	0	0	0	0	0	0	0	0	0	0	0	0	0	0	0	0	0	0	0	0	0	0	0	0	0	0	0	0	0	0	0	0	0	0	0	0	0	0	0	0	0	0	0	0
Photosynthesis	Light-harvesting proteins	cpcA	phycocyanin alpha chain	K02284	0	0	0	0	0	0	0	0	0	0	0	0	0	0	0	0	0	0	0	0	0	0	0	0	0	0	0	0	0	0	0	0	0	0	0	0	0	0	0	0	0	0	0	0	0
Photosynthesis	Light-harvesting proteins	cpcB	phycocyanin beta chain	K02285	0	0	0	0	0	0	0	0	0	0	0	0	0	0	0	0	0	0	0	0	0	0	0	0	0	0	0	0	0	0	0	0	0	0	0	0	0	0	0	0	0	0	0	0	0
Photosynthesis	Light-harvesting proteins	cpcC	phycocyanin-associated rod linker protein	K02286	0	0	0	0	0	0	0	0	0	0	0	0	0	0	0	0	0	0	0	0	0	0	0	0	0	0	0	0	0	0	0	0	0	0	0	0	0	0	0	0	0	0	0	0	0
Photosynthesis	Light-harvesting proteins	cpcD	phycocyanin-associated, rod	K02287	0	0	0	0	0	0	0	0	0	0	0	0	0	0	0	0	0	0	0	0	0	0	0	0	0	0	0	0	0	0	0	0	0	0	0	0	0	0	0	0	0	0	0	0	0
Photosynthesis	Light-harvesting proteins	cpcE	phycocyanobilin lyase subunit alpha	K02288	0	0	0	0	0	0	0	0	0	0	0	0	0	0	0	0	0	0	0	0	0	0	0	0	0	0	0	0	0	0	0	0	0	0	0	0	0	0	0	0	0	0	0	0	0
Photosynthesis	Light-harvesting proteins	cpcF	phycocyanobilin lyase subunit beta	K02289	0	0	0	0	0	0	0	0	0	0	0	0	0	0	0	0	0	0	0	0	0	0	0	0	0	0	0	0	0	0	0	0	0	0	0	0	0	0	0	0	0	0	0	0	0
Photosynthesis	Light-harvesting proteins	rpcG	R-phycocyanin alpha-cysteine-84 phycourobilin lyase/isomerase	K20713	0	0	0	0	0	0	0	0	0	0	0	0	0	0	0	0	0	0	0	0	0	0	0	0	0	0	0	0	0	0	0	0	0	0	0	0	0	0	0	0	0	0	0	0	0
Photosynthesis	Light-harvesting proteins	cpcG	phycobilisome rod-core linker protein	K02290	0	0	0	0	0	0	0	0	0	0	0	0	0	0	0	0	0	0	0	0	0	0	0	0	0	0	0	0	0	0	0	0	0	0	0	0	0	0	0	0	0	0	0	0	0
Photosynthesis	Light-harvesting proteins	pecA	phycoerythrocyanin alpha chain	K02628	0	0	0	0	0	0	0	0	0	0	0	0	0	0	0	0	0	0	0	0	0	0	0	0	0	0	0	0	0	0	0	0	0	0	0	0	0	0	0	0	0	0	0	0	0
Photosynthesis	Light-harvesting proteins	pecB	phycoerythrocyanin beta chain	K02629	0	0	0	0	0	0	0	0	0	0	0	0	0	0	0	0	0	0	0	0	0	0	0	0	0	0	0	0	0	0	0	0	0	0	0	0	0	0	0	0	0	0	0	0	0
Photosynthesis	Light-harvesting proteins	pecC	phycoerythrocyanin-associated rod linker protein	K02630	0	0	0	0	0	0	0	0	0	0	0	0	0	0	0	0	0	0	0	0	0	0	0	0	0	0	0	0	0	0	0	0	0	0	0	0	0	0	0	0	0	0	0	0	0
Photosynthesis	Light-harvesting proteins	pecE	phycoerythrocyanin alpha-cysteine-84 phycoviolobilin lyase/isomerase subunit	K02631	0	0	0	0	0	0	0	0	0	0	0	0	0	0	0	0	0	0	0	0	0	0	0	0	0	0	0	0	0	0	0	0	0	0	0	0	0	0	0	0	0	0	0	0	0
Photosynthesis	Light-harvesting proteins	pecF	phycoerythrocyanin alpha-cysteine-84 phycoviolobilin lyase/isomerase subunit	K02632	0	0	0	0	0	0	0	0	0	0	0	0	0	0	0	0	0	0	0	0	0	0	0	0	0	0	0	0	0	0	0	0	0	0	0	0	0	0	0	0	0	0	0	0	0
Photosynthesis	Light-harvesting proteins	cpeA	phycoerythrin alpha chain	K05376	0	0	0	0	0	0	0	0	0	0	0	0	0	0	0	0	0	0	0	0	0	0	0	0	0	0	0	0	0	0	0	0	0	0	0	0	0	0	0	0	0	0	0	0	0
Photosynthesis	Light-harvesting proteins	cpeB	phycoerythrin beta chain	K05377	0	0	0	0	0	0	0	0	0	0	0	0	0	0	0	0	0	0	0	0	0	0	0	0	0	0	0	0	0	0	0	0	0	0	0	0	0	0	0	0	0	0	0	0	0
Photosynthesis	Light-harvesting proteins	cpeC	phycoerythrin-associated linker protein	K05378	0	0	0	0	0	0	0	0	0	0	0	0	0	0	0	0	0	0	0	0	0	0	0	0	0	0	0	0	0	0	0	0	0	0	0	0	0	0	0	0	0	0	0	0	0
Photosynthesis	Light-harvesting proteins	cpeD	phycoerythrin-associated linker protein	K05379	0	0	0	0	0	0	0	0	0	0	0	0	0	0	0	0	0	0	0	0	0	0	0	0	0	0	0	0	0	0	0	0	0	0	0	0	0	0	0	0	0	0	0	0	0
Photosynthesis	Light-harvesting proteins	cpeE	phycoerythrin-associated linker protein	K05380	0	0	0	0	0	0	0	0	0	0	0	0	0	0	0	0	0	0	0	0	0	0	0	0	0	0	0	0	0	0	0	0	0	0	0	0	0	0	0	0	0	0	0	0	0
Photosynthesis	Light-harvesting proteins	cpeR	phycoerythrin-associated linker protein	K05381	0	0	0	0	0	0	0	0	0	0	0	0	0	0	0	0	0	0	0	0	0	0	0	0	0	0	0	0	0	0	0	0	0	0	0	0	0	0	0	0	0	0	0	0	0
Photosynthesis	Light-harvesting proteins	cpeS	phycoerythrin-associated linker protein	K05382	0	0	0	0	0	0	0	0	0	0	0	0	0	0	0	0	0	0	0	0	0	0	0	0	0	0	0	0	0	0	0	0	0	0	0	0	0	0	0	0	0	0	0	0	0
Photosynthesis	Light-harvesting proteins	cpeT	CpeT protein	K05383	0	0	0	0	0	0	0	0	0	0	0	0	0	0	0	0	0	0	0	0	0	0	0	0	0	0	0	0	0	0	0	0	0	0	0	0	0	0	0	0	0	0	0	0	0
Photosynthesis	Light-harvesting proteins	cpeU	bilin biosynthesis protein	K05384	0	0	0	0	0	0	0	0	0	0	0	0	0	0	0	0	0	0	0	0	0	0	0	0	0	0	0	0	0	0	0	0	0	0	0	0	0	0	0	0	0	0	0	0	0
Photosynthesis	Light-harvesting proteins	cpeY	bilin biosynthesis protein	K05385	0	0	0	0	0	0	0	0	0	0	0	0	0	0	0	0	0	0	0	0	0	0	0	0	0	0	0	0	0	0	0	0	0	0	0	0	0	0	0	0	0	0	0	0	0
Photosynthesis	Light-harvesting proteins	cpeZ	bilin biosynthesis protein	K05386	0	0	0	0	0	0	0	0	0	0	0	0	0	0	0	0	0	0	0	0	0	0	0	0	0	0	0	0	0	0	0	0	0	0	0	0	0	0	0	0	0	0	0	0	0
Photosynthesis	Light-harvesting proteins	LHCA1	light-harvesting complex I chlorophyll a/b binding protein 1	K08907	0	0	0	0	0	0	0	0	0	0	0	0	0	0	0	0	0	0	0	0	0	0	0	0	0	0	0	0	0	0	0	0	0	0	0	0	0	0	0	0	0	0	0	0	0
Photosynthesis	Light-harvesting proteins	LHCA2	light-harvesting complex I chlorophyll a/b binding protein 2	K08908	0	0	0	0	0	0	0	0	0	0	0	0	0	0	0	0	0	0	0	0	0	0	0	0	0	0	0	0	0	0	0	0	0	0	0	0	0	0	0	0	0	0	0	0	0
Photosynthesis	Light-harvesting proteins	LHCA3	light-harvesting complex I chlorophyll a/b binding protein 3	K08909	0	0	0	0	0	0	0	0	0	0	0	0	0	0	0	0	0	0	0	0	0	0	0	0	0	0	0	0	0	0	0	0	0	0	0	0	0	0	0	0	0	0	0	0	0
Photosynthesis	Light-harvesting proteins	LHCA4	light-harvesting complex I chlorophyll a/b binding protein 4	K08910	0	0	0	0	0	0	0	0	0	0	0	0	0	0	0	0	0	0	0	0	0	0	0	0	0	0	0	0	0	0	0	0	0	0	0	0	0	0	0	0	0	0	0	0	0
Photosynthesis	Light-harvesting proteins	LHCA5	light-harvesting complex I chlorophyll a/b binding protein 5	K08911	0	0	0	0	0	0	0	0	0	0	0	0	0	0	0	0	0	0	0	0	0	0	0	0	0	0	0	0	0	0	0	0	0	0	0	0	0	0	0	0	0	0	0	0	0
Photosynthesis	Light-harvesting proteins	LHCB1	light-harvesting complex II chlorophyll a/b binding protein 1	K08912	0	0	0	0	0	0	0	0	0	0	0	0	0	0	0	0	0	0	0	0	0	0	0	0	0	0	0	0	0	0	0	0	0	0	0	0	0	0	0	0	0	0	0	0	0
Photosynthesis	Light-harvesting proteins	LHCB2	light-harvesting complex II chlorophyll a/b binding protein 2	K08913	0	0	0	0	0	0	0	0	0	0	0	0	0	0	0	0	0	0	0	0	0	0	0	0	0	0	0	0	0	0	0	0	0	0	0	0	0	0	0	0	0	0	0	0	0
Photosynthesis	Light-harvesting proteins	LHCB3	light-harvesting complex II chlorophyll a/b binding protein 3	K08914	0	0	0	0	0	0	0	0	0	0	0	0	0	0	0	0	0	0	0	0	0	0	0	0	0	0	0	0	0	0	0	0	0	0	0	0	0	0	0	0	0	0	0	0	0
Photosynthesis	Light-harvesting proteins	LHCB4	light-harvesting complex II chlorophyll a/b binding protein 4	K08915	0	0	0	0	0	0	0	0	0	0	0	0	0	0	0	0	0	0	0	0	0	0	0	0	0	0	0	0	0	0	0	0	0	0	0	0	0	0	0	0	0	0	0	0	0
Photosynthesis	Light-harvesting proteins	LHCB5	light-harvesting complex II chlorophyll a/b binding protein 5	K08916	0	0	0	0	0	0	0	0	0	0	0	0	0	0	0	0	0	0	0	0	0	0	0	0	0	0	0	0	0	0	0	0	0	0	0	0	0	0	0	0	0	0	0	0	0
Photosynthesis	Light-harvesting proteins	LHCB6	light-harvesting complex II chlorophyll a/b binding protein 6	K08917	0	0	0	0	0	0	0	0	0	0	0	0	0	0	0	0	0	0	0	0	0	0	0	0	0	0	0	0	0	0	0	0	0	0	0	0	0	0	0	0	0	0	0	0	0
Photosynthesis	Light-harvesting proteins	LHCB7	light-harvesting complex II chlorophyll a/b binding protein 7	K14172	0	0	0	0	0	0	0	0	0	0	0	0	0	0	0	0	0	0	0	0	0	0	0	0	0	0	0	0	0	0	0	0	0	0	0	0	0	0	0	0	0	0	0	0	0
Photosynthesis	Light-harvesting proteins	pcbA	chlorophyll a/b binding light-harvesting protein PcbA	K08918	0	0	0	0	0	0	0	0	0	0	0	0	0	0	0	0	0	0	0	0	0	0	0	0	0	0	0	0	0	0	0	0	0	0	0	0	0	0	0	0	0	0	0	0	0
Photosynthesis	Light-harvesting proteins	pcbB	chlorophyll a/b binding light-harvesting protein PcbB	K08919	0	0	0	0	0	0	0	0	0	0	0	0	0	0	0	0	0	0	0	0	0	0	0	0	0	0	0	0	0	0	0	0	0	0	0	0	0	0	0	0	0	0	0	0	0
Photosynthesis	Light-harvesting proteins	pcbC	chlorophyll a/b binding light-harvesting protein PcbC	K08920	0	0	0	0	0	0	0	0	0	0	0	0	0	0	0	0	0	0	0	0	0	0	0	0	0	0	0	0	0	0	0	0	0	0	0	0	0	0	0	0	0	0	0	0	0
Photosynthesis	Light-harvesting proteins	pcbD	chlorophyll a/b binding light-harvesting protein PcbD	K08921	0	0	0	0	0	0	0	0	0	0	0	0	0	0	0	0	0	0	0	0	0	0	0	0	0	0	0	0	0	0	0	0	0	0	0	0	0	0	0	0	0	0	0	0	0
Photosynthesis	Light-harvesting proteins	pcbE	chlorophyll a/b binding light-harvesting protein PcbE	K08922	0	0	0	0	0	0	0	0	0	0	0	0	0	0	0	0	0	0	0	0	0	0	0	0	0	0	0	0	0	0	0	0	0	0	0	0	0	0	0	0	0	0	0	0	0
Photosynthesis	Light-harvesting proteins	pcbF	chlorophyll a/b binding light-harvesting protein PcbF	K08923	0	0	0	0	0	0	0	0	0	0	0	0	0	0	0	0	0	0	0	0	0	0	0	0	0	0	0	0	0	0	0	0	0	0	0	0	0	0	0	0	0	0	0	0	0
Photosynthesis	Light-harvesting proteins	pcbG	chlorophyll a/b binding light-harvesting protein PcbG	K08924	0	0	0	0	0	0	0	0	0	0	0	0	0	0	0	0	0	0	0	0	0	0	0	0	0	0	0	0	0	0	0	0	0	0	0	0	0	0	0	0	0	0	0	0	0
Photosynthesis	Light-harvesting proteins	pcbH	chlorophyll a/b binding light-harvesting protein PcbH	K08925	0	0	0	0	0	0	0	0	0	0	0	0	0	0	0	0	0	0	0	0	0	0	0	0	0	0	0	0	0	0	0	0	0	0	0	0	0	0	0	0	0	0	0	0	0
Photosynthesis	Light-harvesting proteins	BchX	3,8-divinyl chlorophyllide a/chlorophyllide a reductase subunit X	K11333	0	0	0	0	0	0	0	0	0	0	0	0	0	0	0	0	0	0	0	0	0	0	0	0	0	0	0	0	0	0	0	0	0	0	0	0	0	0	0	0	0	0	0	0	0
Photosynthesis	Light-harvesting proteins	BchY	3,8-divinyl chlorophyllide a/chlorophyllide a reductase subunit Y	K11334	0	0	0	0	0	0	0	0	0	0	0	0	0	0	0	0	0	0	0	0	0	0	0	0	0	0	0	0	0	0	0	0	0	0	0	0	0	0	0	0	0	0	0	0	0
Photosynthesis	Light-harvesting proteins	BchZ	3,8-divinyl chlorophyllide a/chlorophyllide a reductase subunit Z	K11335	0	0	0	0	0	0	0	0	0	0	0	0	0	0	0	0	0	0	0	0	0	0	0	0	0	0	0	0	0	0	0	0	0	0	0	0	0	0	0	0	0	0	0	0	0
Photosynthesis	Light-harvesting proteins	BchF	3-vinyl bacteriochlorophyllide hydratase	K11336	0	0	0	0	0	0	0	0	0	0	0	0	0	0	0	0	0	0	0	0	0	0	0	0	0	0	0	0	0	0	0	0	0	0	0	0	0	0	0	0	0	0	0	0	0
Photosynthesis	Light-harvesting proteins	BchC	bacteriochlorophyllide a dehydrogenase	K11337	0	0	0	0	0	0	0	0	0	0	0	0	0	0	0	0	0	0	0	0	0	0	0	0	0	0	0	0	0	0	0	0	0	0	0	0	0	0	0	0	0	0	0	0	0
Photosynthesis	Light-harvesting proteins	BchG	chlorophyll/bacteriochlorophyll a synthase	K04040	0	0	0	0	0	0	0	0	0	0	0	0	0	0	0	0	0	0	0	0	0	0	0	0	0	0	0	0	0	0	0	0	0	0	0	0	0	0	0	0	0	0	0	0	0
Photosynthesis	Light-harvesting proteins	FmoA	bacteriochlorophyll A protein	K08944	0	0	0	0	0	0	0	0	0	0	0	0	0	0	0	0	0	0	0	0	0	0	0	0	0	0	0	0	0	0	0	0	0	0	0	0	0	0	0	0	0	0	0	0	0
Photosynthesis	Light-harvesting proteins	BchK	bacteriochlorophyll c synthase	K13605	0	0	0	0	0	0	0	0	0	0	0	0	0	0	0	0	0	0	0	0	0	0	0	0	0	0	0	0	0	0	0	0	0	0	0	0	0	0	0	0	0	0	0	0	0
Photosynthesis	Light-harvesting proteins	BchU	bacteriochlorophyllide d C-20 methyltransferase	K13604	0	0	0	0	0	0	0	0	0	0	0	0	0	0	0	0	0	0	0	0	0	0	0	0	0	0	0	0	0	0	0	0	0	0	0	0	0	0	0	0	0	0	0	0	0
Photosynthesis	Light-harvesting proteins	BchQ	bacteriochlorophyllide d C-8(2)-methyltransferase	K13601	0	0	0	0	0	0	0	0	0	0	0	0	0	0	0	0	0	0	0	0	0	0	0	0	0	0	0	0	0	0	0	0	0	0	0	0	0	0	0	0	0	0	0	0	0
Photosynthesis	Light-harvesting proteins	AcsF	magnesium-protoporphyrin IX monomethyl ester (oxidative) cyclase	K04035	0	0	0	0	0	0	0	0	0	0	0	0	0	0	0	0	0	0	0	0	0	0	0	0	0	0	0	0	0	0	0	0	0	0	0	0	0	0	0	0	0	0	0	0	0
Photosynthesis	Light-harvesting proteins	BchE	anaerobic magnesium-protoporphyrin IX monomethyl ester cyclase	K04034	0	0	0	0	0	0	0	0	0	0	0	0	0	0	0	0	0	0	0	0	0	0	0	0	0	0	0	0	0	0	0	0	0	0	0	0	0	0	0	0	0	0	0	0	0
Trace Gas Oxidation	Carbon Monoxide Metabolism	coxL	aerobic carbon-monoxide dehydrogenase large subunit	K03520	0	1	0	0	1	1	0	0	0	0	0	0	0	0	0	0	0	1	0	0	1	1	0	1	0	0	1	0	0	0	1	0	0	0	0	0	0	1	1	0	1	1	0	1	1
Trace Gas Oxidation	Carbon Monoxide Metabolism	coxS	aerobic carbon-monoxide dehydrogenase small subunit	K03518	0	1	0	0	1	1	0	0	0	0	0	1	0	0	0	0	1	1	1	0	1	1	1	1	1	0	0	0	0	1	1	0	0	1	1	0	1	1	0	1	1	1	0	1	1
Trace Gas Oxidation	Carbon Monoxide Metabolism	coxM	aerobic carbon-monoxide dehydrogenase medium subunit	K03519	0	1	0	0	1	1	1	0	0	0	0	1	0	0	0	0	1	1	0	0	1	1	0	1	1	0	1	0	0	1	1	0	0	0	1	0	0	1	0	0	1	1	0	1	1
Trace Gas Oxidation	Carbon Monoxide Metabolism	cooF	anaerobic carbon-monoxide dehydrogenase iron sulfur subunit	K00196	0	0	0	0	0	0	0	0	0	0	0	0	0	0	0	0	0	0	0	0	0	0	0	0	0	0	0	0	0	0	0	0	0	0	0	0	0	0	0	0	0	0	0	0	0
Trace Gas Oxidation	Carbon Monoxide Metabolism	cooS, acsA	anaerobic carbon-monoxide dehydrogenase catalytic subunit	K00198	0	0	0	0	0	0	0	0	0	0	0	0	0	0	0	0	0	0	0	0	0	0	0	0	0	0	0	0	0	0	0	0	0	0	0	0	0	0	0	0	0	0	0	0	0
Trace Gas Oxidation	Carbon Monoxide Metabolism	fhs	formate--tetrahydrofolate ligase	K01938	0	1	0	0	0	1	1	1	0	0	0	0	0	0	0	0	0	0	1	0	0	0	0	1	1	0	0	0	0	0	0	0	1	0	0	0	0	0	1	1	1	0	0	1	0
Trace Gas Oxidation	Carbon Monoxide Metabolism	MTHFD	methylenetetrahydrofolate dehydrogenase	K00288	0	0	0	0	0	0	0	0	0	0	0	0	0	0	0	0	0	0	0	0	0	0	0	0	0	0	0	0	0	0	0	0	0	0	0	0	0	0	0	0	0	0	0	0	0
Trace Gas Oxidation	Carbon Monoxide Metabolism	folD	methylenetetrahydrofolate dehydrogenase	K01491	0	1	1	0	1	1	1	1	1	0	0	1	0	1	1	1	0	1	1	0	1	0	1	1	0	0	1	1	1	1	0	1	0	0	0	1	0	1	0	0	1	1	1	1	0
Trace Gas Oxidation	Carbon Monoxide Metabolism	metF	Methylenetetrahydrofolate reductase (NADPH)	K00297	1	1	1	1	0	1	1	1	0	1	1	1	0	1	0	1	0	1	1	1	1	1	1	1	1	0	0	1	1	1	1	1	1	1	1	1	1	1	1	1	1	1	1	1	1
Trace Gas Oxidation	Methane Metabolism	mmoX	methane monooxygenase component A alpha chain	K16157	0	0	0	0	0	0	0	0	0	0	0	0	0	0	0	0	0	0	0	0	0	0	0	0	0	0	0	0	0	0	0	0	0	0	0	0	0	0	0	0	0	0	0	0	0
Trace Gas Oxidation	Methane Metabolism	mmoY	methane monooxygenase component A beta chain	K16158	0	0	0	0	0	0	0	0	0	0	0	0	0	0	0	0	0	0	0	0	0	0	0	0	0	0	0	0	0	0	0	0	0	0	0	0	0	0	0	0	0	0	0	0	0
Trace Gas Oxidation	Methane Metabolism	mmoZ	methane monooxygenase component A gamma chain	K16159	0	0	0	0	0	0	0	0	0	0	0	0	0	0	0	0	0	0	0	0	0	0	0	0	0	0	0	0	0	0	0	0	0	0	0	0	0	0	0	0	0	0	0	0	0
Trace Gas Oxidation	Methane Metabolism	mmoB	methane monooxygenase regulatory protein B	K16160	0	0	0	0	0	0	0	0	0	0	0	0	0	0	0	0	0	0	0	0	0	0	0	0	0	0	0	0	0	0	0	0	0	0	0	0	0	0	0	0	0	0	0	0	0
Trace Gas Oxidation	Methane Metabolism	mmoC	methane monooxygenase component C	K16161	0	0	0	0	0	0	0	0	0	0	0	0	0	0	0	0	0	0	0	0	0	0	0	0	0	0	0	0	0	0	0	0	0	0	0	0	0	0	0	0	0	0	0	0	0
Trace Gas Oxidation	Methane Metabolism	mmoD	methane monooxygenase component D	K16162	0	0	0	0	0	0	0	0	0	0	0	0	0	0	0	0	0	0	0	0	0	0	0	0	0	0	0	0	0	0	0	0	0	0	0	0	0	0	0	0	0	0	0	0	0
Trace Gas Oxidation	Methane Metabolism	mdh1	methanol dehydrogenase (cytochrome c) subunit 1	K14028	0	0	0	0	0	0	0	0	0	0	0	0	0	0	0	0	0	0	0	0	0	0	0	0	0	0	0	0	0	0	0	0	0	0	0	0	0	0	0	0	0	0	0	0	0
Trace Gas Oxidation	Methane Metabolism	mdh2	methanol dehydrogenase (cytochrome c) subunit 2	K14029	0	0	0	0	0	0	0	0	0	0	0	0	0	0	0	0	0	0	0	0	0	0	0	0	0	0	0	0	0	0	0	0	0	0	0	0	0	0	0	0	0	0	0	0	0
Trace Gas Oxidation	Methane Metabolism	MOX	alcohol oxidase	K17066	0	0	0	0	0	0	0	0	0	0	0	0	0	0	0	0	0	0	0	0	0	0	0	0	0	0	0	0	0	0	0	0	0	0	0	0	0	0	0	0	0	0	0	0	0
Oxidative Phosphorylation	Type I NADH dehydrogenase	nuoA	NADH-quinone oxidoreductase subunit A	K00330	1	1	1	1	1	1	1	1	0	0	0	0	1	1	1	1	1	1	1	1	0	1	1	1	0	1	1	1	1	1	1	1	1	1	1	1	1	1	1	1	1	1	1	1	1
Oxidative Phosphorylation	Type I NADH dehydrogenase	nuoB	NADH-quinone oxidoreductase subunit B	K00331	1	1	1	1	1	1	1	1	0	0	0	0	1	1	0	1	0	0	0	1	0	1	1	1	0	1	1	1	1	1	1	1	0	1	1	1	0	1	0	1	1	0	1	1	1
Oxidative Phosphorylation	Type I NADH dehydrogenase	nuoC	NADH-quinone oxidoreductase subunit C	K00332	0	0	1	1	0	1	0	0	0	1	0	0	0	0	0	1	0	0	0	1	1	0	0	0	0	1	1	1	0	0	1	0	0	0	1	0	0	0	0	1	1	0	0	0	0
Oxidative Phosphorylation	Type I NADH dehydrogenase	nuoD	NADH-quinone oxidoreductase subunit D	K00333	1	1	1	1	1	1	0	0	0	1	0	0	1	0	1	1	1	1	0	1	1	1	0	1	1	0	1	1	1	1	1	1	0	1	1	1	1	0	0	1	1	0	1	0	1
Oxidative Phosphorylation	Type I NADH dehydrogenase	nuoE	NADH-quinone oxidoreductase subunit E	K00334	1	1	1	0	1	1	0	0	0	0	0	1	1	0	1	1	1	0	0	1	0	1	0	0	0	0	1	1	1	1	0	0	0	1	0	1	0	0	0	1	1	0	1	0	0
Oxidative Phosphorylation	Type I NADH dehydrogenase	nuoF	NADH-quinone oxidoreductase subunit F	K00335	0	1	1	0	1	1	0	0	0	0	0	0	1	0	1	1	1	1	0	1	0	1	0	0	0	0	1	0	1	1	0	0	0	1	0	1	1	0	0	1	1	0	1	1	1
Oxidative Phosphorylation	Type I NADH dehydrogenase	nuoG	NADH-quinone oxidoreductase subunit G	K00336	0	0	0	0	0	0	0	0	0	0	0	0	0	0	0	0	0	0	0	0	0	0	0	0	0	0	0	0	0	0	0	0	0	0	0	0	0	0	0	1	1	0	1	0	0
Oxidative Phosphorylation	Type I NADH dehydrogenase	nuoH	NADH-quinone oxidoreductase subunit H	K00337	1	0	1	1	1	1	0	0	0	1	0	0	1	1	1	1	1	1	1	1	1	1	1	0	0	0	1	1	1	1	1	1	1	1	0	1	1	1	1	1	1	1	1	1	1
Oxidative Phosphorylation	Type I NADH dehydrogenase	nuoI	NADH-quinone oxidoreductase subunit I	K00338	1	0	1	1	1	1	0	0	0	1	0	0	1	0	1	1	1	1	1	1	1	1	0	1	0	0	1	1	1	1	1	1	0	1	1	1	1	0	0	1	1	1	1	1	1
Oxidative Phosphorylation	Type I NADH dehydrogenase	nuoJ	NADH-quinone oxidoreductase subunit J	K00339	1	0	1	1	1	1	1	1	0	1	0	0	1	0	1	1	1	1	1	0	1	1	1	1	0	0	1	1	1	1	1	1	1	1	0	1	0	0	1	1	1	1	1	1	1
Oxidative Phosphorylation	Type I NADH dehydrogenase	nuoK	NADH-quinone oxidoreductase subunit K	K00340	1	0	1	1	1	1	1	1	0	1	1	0	1	1	1	1	1	1	1	1	1	1	1	1	0	1	1	1	1	1	1	1	1	1	1	1	1	1	1	1	1	1	1	1	1
Oxidative Phosphorylation	Type I NADH dehydrogenase	nuoL	NADH-quinone oxidoreductase subunit L	K00341	1	0	1	1	1	1	0	1	0	0	1	0	1	1	1	1	1	1	1	1	0	1	1	1	1	0	1	1	1	1	1	1	1	1	1	1	1	1	1	1	1	1	1	1	1
Oxidative Phosphorylation	Type I NADH dehydrogenase	nuoM	NADH-quinone oxidoreductase subunit M	K00342	1	1	1	0	1	1	0	0	0	0	0	0	1	0	1	1	0	0	1	1	0	1	1	1	0	0	1	1	1	1	1	0	1	1	1	1	0	0	1	1	1	0	1	0	0
Oxidative Phosphorylation	Type I NADH dehydrogenase	nuoN	NADH-quinone oxidoreductase subunit N	K00343	1	1	1	1	1	1	1	0	0	0	1	0	1	1	1	1	1	1	1	1	1	1	1	1	1	1	1	1	1	1	1	1	1	1	1	0	1	1	1	1	1	1	1	1	1
Oxidative Phosphorylation	Cytochrome c oxidase	ctaD	cytochrome c oxidase subunit I	K02274	0	1	1	0	1	1	0	0	0	0	0	0	1	0	0	1	1	1	1	0	1	0	0	0	0	0	1	1	1	1	0	0	0	1	1	0	1	0	1	1	0	1	1	0	0
Oxidative Phosphorylation	Cytochrome c oxidase	ctaC	cytochrome c oxidase subunit II	K02275	1	1	1	1	1	1	0	0	0	0	1	0	1	0	1	1	1	1	1	1	1	1	0	1	0	1	1	1	1	1	1	1	0	1	1	0	1	0	1	1	0	1	1	1	1
Oxidative Phosphorylation	Cytochrome c oxidase	ctaE	cytochrome c oxidase subunit III	K02276	1	0	1	1	1	1	0	0	1	1	1	0	1	0	1	1	1	1	1	0	1	0	0	1	1	1	1	1	1	1	1	1	0	1	1	1	1	0	1	1	1	1	1	1	1
Oxidative Phosphorylation	Cytochrome c oxidase	coxD, ctaF	cytochrome c oxidase subunit IV	K02277	1	0	0	1	1	0	0	0	0	0	0	1	0	0	1	0	0	0	1	0	1	0	0	1	0	0	0	0	1	1	1	0	0	1	1	1	0	0	0	0	0	0	1	1	1
Oxidative Phosphorylation	Cytochrome c oxidase	COX11, ctaG	cytochrome c oxidase assembly protein subunit 11	K02258	0	0	1	0	0	0	0	0	0	1	0	0	1	0	0	1	0	0	0	0	0	0	0	0	0	0	1	0	0	0	0	0	0	0	0	0	0	0	0	0	0	0	0	0	0
Oxidative Phosphorylation	Cytochrome c oxidase	COX15, ctaA	cytochrome c oxidase assembly protein subunit 15	K02259	1	1	1	1	1	1	0	1	1	0	1	0	1	0	1	1	1	1	1	1	1	0	0	1	1	0	1	1	1	1	1	1	1	1	1	1	0	0	1	1	1	1	1	1	0
Oxidative Phosphorylation	Cytochrome c oxidase	COX17	cytochrome c oxidase assembly protein subunit 17	K02260	0	0	0	0	0	0	0	0	0	0	0	0	0	0	0	0	0	0	0	0	0	0	0	0	0	0	0	0	0	0	0	0	0	0	0	0	0	0	0	0	0	0	0	0	0
Oxidative Phosphorylation	Heme o synthase	COX10, ctaB, cyoE	heme o synthase	K02257	1	1	1	0	1	1	0	1	1	0	1	1	1	0	1	1	1	1	1	1	1	0	0	1	1	0	1	1	1	1	1	1	1	1	1	1	1	0	1	1	1	1	1	1	0
Oxidative Phosphorylation	Fumarate reductase	frdA	fumarate reductase flavoprotein subunit [EC:1.3.5.4]	K00244	0	0	0	0	0	0	0	0	0	0	0	0	0	0	0	0	0	0	0	0	0	0	0	0	0	0	0	0	0	0	0	0	0	0	0	0	0	0	0	0	0	0	0	0	0
Oxidative Phosphorylation	Fumarate reductase	frdb	fumarate reductase iron-sulfur subunit [EC:1.3.5.4]	K00245	0	0	0	0	0	0	0	0	0	0	0	0	0	0	0	0	0	0	0	0	0	0	0	0	0	0	0	0	0	0	0	0	0	0	0	0	0	0	0	0	0	0	0	0	0
Oxidative Phosphorylation	Fumarate reductase	frdC	fumarate reductase subunit C	K00246	0	0	0	0	0	0	0	0	0	0	1	0	0	0	0	0	0	0	0	0	0	0	0	0	0	0	0	0	0	0	0	0	0	0	0	0	0	0	0	0	0	0	0	0	0
Oxidative Phosphorylation	Fumarate reductase	frdD	fumarate reductase subunit D	K00247	0	0	0	0	0	0	0	0	0	0	1	0	0	0	0	0	0	0	0	0	0	0	0	0	0	0	0	0	0	0	0	0	0	0	0	0	0	0	0	0	0	0	0	0	0
Oxidative Phosphorylation	ATPase	ATPF1A	F-type H+/Na+-transporting ATPase subunit alpha	K02111	1	1	1	1	0	1	0	1	1	0	0	1	1	1	1	1	1	1	1	1	1	1	1	1	1	1	0	1	1	1	1	0	1	1	1	1	1	1	1	1	1	0	1	0	0
Oxidative Phosphorylation	ATPase	ATPF0A	F-type H+-transporting ATPase subunit a	K02108	1	1	1	1	1	1	0	0	1	1	0	0	0	1	1	1	1	1	1	1	1	1	1	1	0	0	0	1	1	1	1	1	1	1	1	1	1	0	1	1	1	1	1	0	0
Oxidative Phosphorylation	ATPase	ATPF1D	F-type H+-transporting ATPase subunit delta	K02113	1	1	1	1	1	1	0	1	1	0	0	0	0	1	1	1	1	1	1	1	1	1	1	1	1	1	0	1	1	1	1	1	1	1	1	1	1	0	1	1	1	1	1	0	0
Oxidative Phosphorylation	ATPase	ATPF1E	F-type H+-transporting ATPase subunit epsilon	K02114	1	0	1	1	0	0	1	1	0	1	0	0	1	1	0	1	1	0	1	1	1	1	1	1	1	1	1	1	1	1	1	0	0	1	1	1	0	1	1	1	1	0	1	1	0
Oxidative Phosphorylation	ATPase	ATPF1B	F-type H+/Na+-transporting ATPase subunit beta	K02112	0	1	1	0	1	1	0	1	0	1	0	1	1	1	1	1	1	1	1	1	1	1	1	1	1	0	1	1	1	1	1	0	0	1	1	1	0	1	1	1	1	0	1	1	0
Oxidative Phosphorylation	ATPase	ATPF0C	F-type H+-transporting ATPase subunit c	K02110	1	1	0	0	1	1	0	1	1	0	0	0	0	1	0	0	0	1	1	1	1	1	1	0	0	1	0	0	1	1	1	1	1	1	1	0	1	0	1	1	0	1	1	0	0
Oxidative Phosphorylation	ATPase	ATPF0B	F-type H+-transporting ATPase subunit b	K02109	1	1	1	1	1	1	0	1	1	1	0	0	0	1	1	1	0	1	1	1	1	1	1	1	1	1	0	1	1	1	1	1	1	1	1	1	1	0	1	1	1	1	1	0	0
Oxidative Phosphorylation	ATPase	ATPF1G	F-type H+-transporting ATPase subunit gamma	K02115	0	1	1	1	0	1	0	0	1	0	1	1	1	1	1	1	0	0	1	1	1	1	1	1	1	1	1	1	1	1	1	0	1	1	1	1	0	1	1	1	1	0	1	1	0
Oxidative Phosphorylation	ATPase	atpI	ATP synthase protein I	K02116	0	1	0	0	0	0	0	0	0	0	0	0	0	0	0	1	1	0	0	0	0	0	0	0	0	0	0	1	0	0	0	0	0	0	0	0	0	0	0	0	0	0	0	0	0
Oxidative Phosphorylation	ATPase	ATPF1D	F-type H+-transporting ATPase subunit delta	K02113	1	1	1	1	1	1	0	1	1	0	0	0	0	1	1	1	1	1	1	1	1	1	1	1	1	1	0	1	1	1	1	1	1	1	1	1	1	0	1	1	1	1	1	0	0
Oxidative Phosphorylation	ATPase	ATPF1E	F-type H+-transporting ATPase subunit epsilon	K02114	1	0	1	1	0	0	1	1	0	1	0	0	1	1	0	1	1	0	1	1	1	1	1	1	1	1	1	1	1	1	1	0	0	1	1	1	0	1	1	1	1	0	1	1	0
Carbon Cycling	Pyruvate Metabolism	porA	pyruvate ferredoxin oxidoreductase alpha subunit	K03737	0	0	0	0	0	0	0	0	0	0	0	0	0	0	0	0	1	0	0	0	0	0	0	0	0	0	0	0	0	0	0	0	0	0	0	0	0	0	0	0	0	0	0	0	0
Carbon Cycling	Pyruvate Metabolism	porB	pyruvate ferredoxin oxidoreductase beta subunit	K00169	0	0	0	0	0	0	0	0	0	0	0	0	0	0	0	0	0	0	0	0	0	0	0	0	0	0	0	0	0	0	0	0	0	0	0	0	0	0	0	0	0	0	0	0	0
Carbon Cycling	Pyruvate Metabolism	porD	pyruvate ferredoxin oxidoreductase delta subunit	K00170	0	0	0	0	0	0	0	0	0	0	0	0	0	0	0	0	0	0	0	0	0	0	0	0	0	0	0	0	0	0	0	0	0	0	0	0	0	0	0	0	0	0	0	0	0
Carbon Cycling	Pyruvate Metabolism	porG	pyruvate ferredoxin oxidoreductase gamma subunit	K00171	0	0	0	0	0	0	0	0	0	0	0	0	0	0	0	0	0	0	0	0	0	0	0	0	0	0	0	0	0	0	0	0	0	0	0	0	0	0	0	0	0	0	0	0	0
Carbon Cycling	Pyruvate Metabolism	ppsA	pyruvate, water dikinase	K00172	0	0	0	0	0	0	0	0	0	0	0	0	0	0	0	0	0	0	0	0	0	0	0	0	0	0	0	0	0	0	0	0	0	0	0	0	0	0	0	0	0	0	0	0	0
Carbon Cycling	Pyruvate Metabolism	ppdK	pyruvate, orthophosphate dikinase	K01007	0	0	0	0	0	0	0	0	0	0	0	0	0	0	0	0	0	0	0	1	0	1	0	0	0	0	0	0	0	1	0	0	0	0	0	0	0	0	0	0	0	0	0	0	0
Carbon Cycling	Pyruvate Metabolism	ppc	phosphoenolpyruvate carboxylase	K01006	0	1	0	0	1	1	1	1	1	1	1	1	0	1	1	1	1	0	1	0	0	0	1	0	1	0	1	0	1	1	1	0	1	1	1	1	0	1	1	1	1	1	1	0	0
Carbon Cycling	Pyruvate Metabolism	pycA	pyruvate carboxylase subunit A	K01595	0	1	1	1	0	1	1	1	0	0	0	0	0	1	0	0	1	0	1	0	1	0	0	1	1	1	1	1	1	1	0	0	1	1	1	1	1	1	1	1	0	1	0	1	0
Carbon Cycling	Pyruvate Metabolism	pycB	pyruvate carboxylase subunit B	K01959	0	0	0	0	0	0	0	0	0	0	0	0	0	0	0	0	0	0	0	0	0	0	0	0	0	0	0	0	0	0	0	0	0	0	0	0	0	0	0	0	0	0	0	0	0
Carbon Cycling	Pyruvate Metabolism	pyc	pyruvate carboxylase	K01960	0	0	0	0	0	0	0	0	0	0	0	0	0	0	0	0	0	0	0	0	0	0	0	0	0	0	0	0	0	0	0	0	0	0	0	0	0	0	0	0	0	0	0	0	0
Carbon Cycling	TCA Cycle	mdh	malate dehydrogenase	K01958	1	0	1	1	0	0	0	0	0	0	0	0	0	0	0	0	0	0	0	1	0	1	0	1	0	0	0	1	0	0	0	1	1	0	0	0	0	0	0	0	0	0	0	1	0
Carbon Cycling	TCA Cycle	fumA, fumB	fumarate hydratase, class I	K01676	0	0	0	0	0	0	0	0	0	0	0	0	0	0	0	0	0	0	0	0	0	0	0	0	0	0	0	0	0	0	0	0	0	0	0	0	0	0	0	0	0	0	0	0	0
Carbon Cycling	TCA Cycle	fumA	fumarate hydratase subunit alpha	K01677	0	1	0	0	0	1	0	0	0	0	0	0	0	1	1	0	0	0	0	0	0	0	1	0	0	0	0	0	0	0	0	0	0	0	0	0	0	1	0	0	0	0	0	0	0
Carbon Cycling	TCA Cycle	fumB	fumarate hydratase subunit beta	K01678	0	1	0	0	0	1	0	0	0	0	0	0	0	1	0	0	0	0	0	0	0	0	0	0	0	0	0	0	0	0	0	0	0	0	0	0	0	0	0	0	0	0	0	0	0
Carbon Cycling	TCA Cycle	fumC	fumarate hydratase, class II	K01679	0	1	0	0	1	0	1	0	0	0	1	1	0	0	1	0	0	0	1	1	1	1	1	1	1	1	1	0	1	1	0	1	1	1	1	1	0	0	0	1	1	1	0	1	1
Carbon Cycling	TCA Cycle	sdhA	succinate dehydrogenase / fumarate reductase, flavoprotein subunit	K00239	0	1	1	0	1	0	1	0	1	1	1	1	1	0	1	1	0	0	1	0	1	0	1	1	1	0	1	0	1	1	1	0	1	1	1	1	0	1	1	1	1	1	1	1	1
Carbon Cycling	TCA Cycle	sdhB	succinate dehydrogenase / fumarate reductase, iron-sulfur subunit	K00240	0	1	1	1	1	0	1	1	1	0	1	0	1	0	1	1	0	0	1	1	1	0	1	1	1	0	1	0	1	1	1	0	0	1	1	1	1	1	1	1	1	1	1	1	1
Carbon Cycling	TCA Cycle	sdhC	succinate dehydrogenase / fumarate reductase, cytochrome b subunit	K00241	0	0	0	0	1	0	0	1	0	0	1	0	0	0	0	1	0	0	0	1	0	0	0	0	0	0	0	0	0	1	0	0	0	0	0	0	0	0	0	1	0	0	0	0	1
Carbon Cycling	TCA Cycle	sdhD	succinate dehydrogenase / fumarate reductase, membrane anchor subunit	K00242	0	0	0	0	0	0	0	0	0	0	1	0	0	0	0	1	0	0	0	0	0	0	0	0	0	0	0	0	0	0	0	0	0	0	0	0	0	0	0	1	0	0	0	0	1
Carbon Cycling	TCA Cycle	sucD	succinyl-CoA synthetase alpha subunit	K01902	0	1	1	1	1	0	1	0	0	1	1	1	1	0	1	1	1	1	1	1	1	1	1	1	1	1	1	0	0	1	0	0	1	1	1	1	1	1	1	1	1	1	1	1	1
Carbon Cycling	TCA Cycle	sucC	succinyl-CoA synthetase beta subunit	K01903	1	0	1	0	1	1	1	0	0	1	0	0	1	0	1	1	1	0	1	1	1	1	1	1	1	1	1	0	0	1	0	0	1	1	1	1	1	1	0	0	1	1	1	1	0
Carbon Cycling	TCA Cycle	LSC1	succinyl-CoA synthetase alpha subunit	K01899	0	0	0	0	0	0	0	0	0	0	0	0	0	0	0	0	0	0	0	0	0	0	0	0	0	0	0	0	0	0	0	0	0	0	0	0	0	0	0	0	0	0	0	0	0
Carbon Cycling	TCA Cycle	LSC2	succinyl-CoA synthetase beta subunit	K01900	0	0	0	0	0	0	0	0	0	0	0	0	0	0	0	0	0	0	0	0	0	0	0	0	0	0	0	0	0	0	0	0	0	0	0	0	0	0	0	0	0	0	0	0	0
Carbon Cycling	TCA Cycle	aarC	succinyl-CoA:acetate CoA-transferase	K18118	0	0	0	0	0	0	0	0	0	0	0	0	0	0	0	0	0	0	0	0	0	0	0	0	0	0	0	0	0	0	0	0	0	0	0	0	0	0	0	0	0	0	0	0	0
Carbon Cycling	TCA Cycle	SDHA	succinate dehydrogenase (ubiquinone) flavoprotein subunit	K00234	0	0	0	0	0	0	0	0	0	0	0	0	0	0	0	0	0	0	0	0	0	0	0	0	0	0	0	0	0	0	0	0	0	0	0	0	0	0	0	0	0	0	0	0	0
Carbon Cycling	TCA Cycle	SDHB	succinate dehydrogenase (ubiquinone) iron-sulfur subunit	K00235	0	0	0	0	0	0	0	0	0	0	0	0	0	0	0	0	0	0	0	0	0	0	0	0	0	0	0	0	0	0	0	0	0	0	0	0	0	0	0	0	0	0	0	0	0
Carbon Cycling	TCA Cycle	SDHC	succinate dehydrogenase (ubiquinone) cytochrome b560 subunit	K00236	0	0	0	0	0	0	0	0	0	0	0	0	0	0	0	0	0	0	0	0	0	0	0	0	0	0	0	0	0	0	0	0	0	0	0	0	0	0	0	0	0	0	0	0	0
Carbon Cycling	TCA Cycle	SDHD	succinate dehydrogenase (ubiquinone) membrane anchor subunit	K00237	0	0	0	0	0	0	0	0	0	0	0	0	0	0	0	0	0	0	0	0	0	0	0	0	0	0	0	0	0	0	0	0	0	0	0	0	0	0	0	0	0	0	0	0	0
Carbon Cycling	CBB Cycle	prkB	phosphoribulokinase	K00855	0	0	1	0	0	1	1	0	0	0	1	0	0	0	0	0	0	0	1	0	0	0	0	1	1	1	1	0	1	0	1	1	1	0	0	0	1	0	1	1	1	1	0	1	0
Carbon Cycling	CBB Cycle	rbcL	ribulose-bisphosphate carboxylase large chain	K01601	1	0	1	0	0	0	1	0	0	0	0	0	0	0	0	1	0	0	1	0	0	0	0	1	1	0	1	0	0	0	0	0	1	0	0	0	1	0	0	1	1	1	0	1	1
Carbon Cycling	CBB Cycle	rbcS	ribulose-bisphosphate carboxylase small chain	K01602	1	0	1	0	0	0	1	0	0	0	1	0	0	0	0	1	0	0	1	0	0	0	0	1	1	0	1	0	1	0	0	0	1	0	0	0	1	0	1	1	1	1	0	1	1
Carbon Cycling	CBB Cycle	pgk	phosphoglycerate kinase	K00927	1	1	1	1	1	1	1	1	0	1	1	1	1	1	1	0	1	1	1	1	1	0	1	1	1	1	1	1	0	1	1	0	1	1	1	0	1	1	1	1	1	1	1	1	1
Carbon Cycling	CBB Cycle	GAPDH	glyceraldehyde 3-phosphate dehydrogenase	K00134	0	1	1	1	1	1	1	1	1	1	1	1	1	1	1	0	1	1	1	1	1	0	1	1	1	1	1	1	0	1	1	0	1	1	1	1	1	0	1	1	1	1	1	1	1
Carbon Cycling	CBB Cycle	GAPDHS	glyceraldehyde-3-phosphate dehydrogenase, spermatogenic	K10705	0	0	0	0	0	0	0	0	0	0	0	0	0	0	0	0	0	0	0	0	0	0	0	0	0	0	0	0	0	0	0	0	0	0	0	0	0	0	0	0	0	0	0	0	0
Carbon Cycling	CBB Cycle	gap2	glyceraldehyde-3-phosphate dehydrogenase (NAD(P))	K00150	0	0	0	0	0	0	0	0	0	0	0	0	0	0	0	0	0	0	0	0	0	0	0	0	0	0	0	0	0	0	0	0	0	0	0	0	0	0	0	0	0	0	0	0	0
Carbon Cycling	CBB Cycle	GAPA	glyceraldehyde-3-phosphate dehydrogenase (NADP+) (phosphorylating)	K05298	0	0	0	0	0	0	0	0	0	0	0	0	0	0	0	0	0	0	0	0	0	0	0	0	0	0	0	0	0	0	0	0	0	0	0	0	0	0	0	0	0	0	0	0	0
Carbon Cycling	CBB Cycle	ALDO	fructose-bisphosphate aldolase, class I	K01623	0	1	1	0	1	1	1	0	0	1	0	0	0	0	1	0	1	0	0	0	0	1	1	1	0	1	0	0	0	1	0	0	1	1	0	1	1	0	0	1	1	1	1	1	0
Carbon Cycling	CBB Cycle	FBA, fbaA	fructose-bisphosphate aldolase, class II	K01624	1	1	0	1	0	0	1	0	0	0	0	0	0	0	0	0	0	0	0	1	1	0	0	1	1	0	0	0	1	1	0	1	1	1	1	1	1	0	0	0	0	1	0	1	0
Carbon Cycling	CBB Cycle	eda	2-dehydro-3-deoxyphosphogluconate aldolase / (4S)-4-hydroxy-2-oxoglutarate aldolase	K01625	1	0	0	0	0	0	0	0	0	1	0	0	1	1	0	0	0	0	0	0	0	0	0	0	1	0	0	0	0	0	0	0	0	1	1	1	0	0	0	0	0	1	0	0	0
Carbon Cycling	CBB Cycle	FBP, fbp	fructose-1,6-bisphosphatase I	K03841	0	0	0	0	0	0	1	0	0	0	0	0	0	0	0	0	0	0	0	0	0	0	0	0	0	0	0	0	1	0	0	0	0	0	0	0	0	0	0	0	0	1	0	0	0
Carbon Cycling	CBB Cycle	glpX	fructose-1,6-bisphosphatase II	K02446	0	0	1	1	1	0	1	1	1	0	1	1	1	0	1	0	1	0	0	1	1	0	1	1	1	0	0	0	1	0	0	1	1	1	1	1	0	1	1	1	1	1	1	1	1
Carbon Cycling	CBB Cycle	glpX-SEBP	fructose-1,6-bisphosphatase II / sedoheptulose-1,7-bisphosphatase	K11532	0	0	0	0	0	0	0	0	0	0	0	0	0	0	0	0	0	0	0	0	0	0	0	0	0	0	0	0	0	0	0	0	0	0	0	0	0	0	0	0	0	0	0	0	0
Carbon Cycling	CBB Cycle	fbp-SEBP	fructose-1,6-bisphosphatase I / sedoheptulose-1,7-bisphosphatase	K01086	0	0	0	0	0	0	0	0	0	0	0	0	0	0	0	0	0	0	0	0	0	0	0	1	0	0	0	0	0	0	0	0	0	0	0	0	0	0	0	0	0	0	0	1	0
Carbon Cycling	CBB Cycle	fbp3	fructose-1,6-bisphosphatase III	K04041	0	0	0	0	0	0	0	0	0	0	0	0	0	0	0	0	0	0	0	0	0	0	0	0	0	0	0	0	0	0	0	0	0	0	0	0	0	0	0	0	0	0	0	0	0
Carbon Cycling	CBB Cycle	tktA, tktB	transketolase	K00615	1	1	0	1	1	1	1	1	1	1	1	1	1	0	1	1	0	1	1	0	1	1	1	1	1	1	0	0	1	1	1	1	1	1	1	1	1	1	1	1	1	1	1	1	1
Carbon Cycling	CBB Cycle	tpiA	Triosephosphate isomerase	K01803	1	1	1	1	1	1	1	1	0	0	1	1	1	1	1	1	1	1	1	1	1	0	1	1	1	1	1	1	1	1	1	0	1	1	1	0	1	1	1	1	1	1	1	1	1
Carbon Cycling	CBB Cycle	rpiA	ribose 5-phosphate isomerase A	K01807	0	1	1	0	0	1	0	0	0	0	0	0	1	1	1	0	1	0	0	0	0	0	0	0	0	0	0	0	0	0	1	0	0	0	0	1	0	1	0	0	0	0	0	0	0
Carbon Cycling	CBB Cycle	rpiB	ribose 5-phosphate isomerase B	K01808	1	0	0	1	1	0	1	0	1	1	1	1	1	0	1	1	1	1	1	1	1	0	1	1	1	0	0	0	1	1	0	1	1	0	1	0	0	0	1	1	1	1	1	1	0
[truncated: 185 more columns]

## Sheet: Sheet4
Bin ID/Genome	Old Bin ID/Genome	Order here	Bin #	Original order (user_genome_old)
TR1_1	SC8804_S10_1	6	45	158
TR1_10	SC8804_S10_10	3	180	563
TR1_13	SC8804_S10_13	2	197	761
TR1_14	SC8804_S10_14	1	46	160
TR1_15	SC8804_S10_15	4	193	66
TR1_18	SC8804_S10_18	5	44	802
TR1_21	SC8804_S10_21	7	74	389
TR1_23	SC8804_S10_23	8	124	721
TR1_25	SC8804_S10_25	9	131	686
TR1_27	SC8804_S10_27	10	199	568
TR1_29	SC8804_S10_29	11	215	527
TR1_3	SC8804_S10_3	14	210	608
TR1_30	SC8804_S10_30	12	75	518
TR1_34	SC8804_S10_34	13	187	396
TR1_4	SC8804_S10_4	15	16	653
TR1_5	SC8804_S10_5	16	201	588
TR1_8	SC8804_S10_8	17	90	239
TR1_9	SC8804_S10_9	18	102	226
TR2_1	SC8805_S11_1	23	176	443
TR2_10	SC8805_S11_10	19	73	757
TR2_12	SC8805_S11_12	20	30	377
TR2_13	SC8805_S11_13	21	181	209
TR2_16	SC8805_S11_16	22	151	749
TR2_2	SC8805_S11_2	28	200	313
TR2_20	SC8805_S11_20	24	66	584
TR2_22	SC8805_S11_22	25	34	82
TR2_23	SC8805_S11_23	26	88	195
TR2_26	SC8805_S11_26	27	106	328
TR2_3	SC8805_S11_3	29	177	753
TR2_4	SC8805_S11_4	30	175	754
TR2_5	SC8805_S11_5	31	146	438
TR2_6	SC8805_S11_6	32	87	332
TR2_7	SC8805_S11_7	33	139	474
TR2_8	SC8805_S11_8	34	28	205
TR2_9	SC8805_S11_9	35	148	444
TR3_1	SC8806_S10_1	44	110	361
TR3_10	SC8806_S10_10	36	222	183
TR3_11	SC8806_S10_11	37	179	777
TR3_12	SC8806_S10_12	38	92	759
TR3_13	SC8806_S10_13	39	69	285
TR3_14	SC8806_S10_14	40	141	406
TR3_16	SC8806_S10_16	41	48	476
TR3_17	SC8806_S10_17	42	64	52
TR3_19	SC8806_S10_19	43	82	116
TR3_2	SC8806_S10_2	49	135	122
TR3_20	SC8806_S10_20	45	105	465
TR3_21	SC8806_S10_21	46	229	305
TR3_22	SC8806_S10_22	47	224	786
TR3_23	SC8806_S10_23	48	63	781
TR3_3	SC8806_S10_3	50	136	471
TR3_4	SC8806_S10_4	52	61	411
TR3_41	SC8806_S10_41	51	76	146
TR3_5	SC8806_S10_5	53	68	408
TR3_6	SC8806_S10_6	54	42	153
TR3_7	SC8806_S10_7	55	118	708
TR3_8	SC8806_S10_8	56	72	395
TR3_9	SC8806_S10_9	57	140	477
NH1_1	SC8807_S12_1	63	174	554
NH1_12	SC8807_S12_12	58	188	755
NH1_13	SC8807_S12_13	59	204	610
NH1_14	SC8807_S12_14	60	202	574
NH1_17	SC8807_S12_17	61	53	586
NH1_18	SC8807_S12_18	62	196	42
NH1_2	SC8807_S12_2	69	190	719
NH1_20	SC8807_S12_20	64	149	811
NH1_22	SC8807_S12_22	65	130	428
NH1_23	SC8807_S12_23	66	132	687
NH1_26	SC8807_S12_26	67	203	680
NH1_28	SC8807_S12_28	68	125	569
NH1_3	SC8807_S12_3	71	213	543
NH1_30	SC8807_S12_30	70	206	525
NH1_4	SC8807_S12_4	72	127	715
NH1_5	SC8807_S12_5	73	184	603
NH1_6	SC8807_S12_6	74	191	807
NH1_8	SC8807_S12_8	75	219	671
NH1_9	SC8807_S12_9	76	183	747
NH2_1	SC8808_S13_1	84	117	803
NH2_10	SC8808_S13_10	77	218	697
NH2_11	SC8808_S13_11	78	47	673
NH2_13	SC8808_S13_13	79	115	49
NH2_14	SC8808_S13_14	80	217	695
NH2_15	SC8808_S13_15	81	209	670
NH2_16	SC8808_S13_16	82	214	528
NH2_17	SC8808_S13_17	83	192	523
NH2_2	SC8808_S13_2	87	205	665
NH2_20	SC8808_S13_20	85	198	535
NH2_24	SC8808_S13_24	86	26	561
NH2_3	SC8808_S13_3	89	133	646
NH2_35	SC8808_S13_35	88	18	612
NH2_4	SC8808_S13_4	92	137	800
NH2_42	SC8808_S13_42	90	37	466
NH2_44	SC8808_S13_44	91	194	119
NH2_5	SC8808_S13_5	93	134	611
NH2_7	SC8808_S13_7	94	216	674
NH2_8	SC8808_S13_8	95	103	299
NH2_9	SC8808_S13_9	96	89	242
NH3_1	SC8809_S14_1	103	178	718
NH3_10	SC8809_S14_10	97	40	758
NH3_12	SC8809_S14_12	98	104	90
NH3_14	SC8809_S14_14	99	161	304
NH3_15	SC8809_S14_15	100	150	419
NH3_17	SC8809_S14_17	101	41	433
NH3_18	SC8809_S14_18	102	126	154
NH3_2	SC8809_S14_2	107	160	416
NH3_23	SC8809_S14_23	104	145	420
NH3_25	SC8809_S14_25	105	36	425
NH3_27	SC8809_S14_27	106	163	190
NH3_3	SC8809_S14_3	109	35	198
NH3_33	SC8809_S14_33	108	33	191
NH3_4	SC8809_S14_4	110	109	185
NH3_5	SC8809_S14_5	112	71	300
NH3_57	SC8809_S14_57	111	108	384
NH3_6	SC8809_S14_6	113	77	374
NH3_7	SC8809_S14_7	114	162	417
NH3_9	SC8809_S14_9	115	43	152
MP1_1	SC8810_S15_1	124	55	712
MP1_10	SC8810_S15_10	116	228	18
MP1_11	SC8810_S15_11	117	147	791
MP1_12	SC8810_S15_12	118	212	429
MP1_14	SC8810_S15_14	119	17	521
MP1_15	SC8810_S15_15	120	101	641
MP1_16	SC8810_S15_16	121	143	227
MP1_17	SC8810_S15_17	122	57	422
MP1_18	SC8810_S15_18	123	129	60
MP1_2	SC8810_S15_2	135	60	616
MP1_20	SC8810_S15_20	125	78	23
MP1_21	SC8810_S15_21	126	211	372
MP1_22	SC8810_S15_22	127	119	517
MP1_23	SC8810_S15_23	128	91	707
MP1_24	SC8810_S15_24	129	81	233
MP1_25	SC8810_S15_25	130	185	359
MP1_26	SC8810_S15_26	131	19	604
MP1_27	SC8810_S15_27	132	116	634
MP1_28	SC8810_S15_28	133	39	700
MP1_29	SC8810_S15_29	134	10	85
MP1_3	SC8810_S15_3	139	38	774
MP1_30	SC8810_S15_30	136	93	88
MP1_32	SC8810_S15_32	137	49	281
MP1_33	SC8810_S15_33	138	225	54
MP1_4	SC8810_S15_4	141	15	787
MP1_43	SC8810_S15_43	140	230	661
MP1_5	SC8810_S15_5	144	54	102
MP1_50	SC8810_S15_50	142	94	41
MP1_52	SC8810_S15_52	143	65	283
MP1_6	SC8810_S15_6	145	189	818
MP1_7	SC8810_S15_7	146	50	56
MP1_8	SC8810_S15_8	147	142	28
MP1_9	SC8810_S15_9	148	221	778
MP2_1	SC8811_S16_1	158	11	112
MP2_10	SC8811_S16_10	149	31	627
MP2_11	SC8811_S16_11	150	29	24
MP2_12	SC8811_S16_12	151	157	220
MP2_13	SC8811_S16_13	152	95	452
MP2_14	SC8811_S16_14	153	51	272
MP2_15	SC8811_S16_15	154	100	21
MP2_16	SC8811_S16_16	155	144	27
MP2_18	SC8811_S16_18	156	99	423
MP2_19	SC8811_S16_19	157	62	284
MP2_2	SC8811_S16_2	166	172	253
MP2_20	SC8811_S16_20	159	227	505
MP2_22	SC8811_S16_22	160	153	768
MP2_23	SC8811_S16_23	161	208	453
MP2_24	SC8811_S16_24	162	52	529
MP2_25	SC8811_S16_25	163	167	45
MP2_28	SC8811_S16_28	164	122	497
MP2_29	SC8811_S16_29	165	98	702
MP2_3	SC8811_S16_3	168	165	62
MP2_30	SC8811_S16_30	167	58	500
MP2_4	SC8811_S16_4	169	171	35
MP2_5	SC8811_S16_5	170	56	19
MP2_6	SC8811_S16_6	171	156	461
MP2_7	SC8811_S16_7	172	59	22
MP2_8	SC8811_S16_8	173	173	33
MP3_1	SC8812_S17_1	183	12	606
MP3_10	SC8812_S17_10	174	166	624
MP3_11	SC8812_S17_11	175	223	31
MP3_12	SC8812_S17_12	176	152	782
MP3_13	SC8812_S17_13	177	121	454
MP3_15	SC8812_S17_15	178	155	701
MP3_16	SC8812_S17_16	179	8	455
MP3_17	SC8812_S17_17	180	96	619
MP3_18	SC8812_S17_18	181	170	271
MP3_19	SC8812_S17_19	182	186	30
MP3_2	SC8812_S17_2	187	220	496
MP3_20	SC8812_S17_20	184	120	769
MP3_25	SC8812_S17_25	185	169	706
MP3_26	SC8812_S17_26	186	168	495
MP3_4	SC8812_S17_4	188	32	222
MP3_5	SC8812_S17_5	189	154	457
MP3_6	SC8812_S17_6	190	67	81
MP3_7	SC8812_S17_7	191	13	623
MP3_8	SC8812_S17_8	192	195	566
MP3_9	SC8812_S17_9	193	9	617
TP1_1	SC8813_S18_1	194	86	329
TP1_2	SC8813_S18_2	195	79	348
TP1_3	SC8813_S18_3	196	2	10
TP1_4	SC8813_S18_4	197	25	667
TP1_5	SC8813_S18_5	198	114	510
TP1_8	SC8813_S18_8	199	107	318
TP1_9	SC8813_S18_9	200	84	353
TP2_4	SC8814_S19_4	201	80	355
TP2_5	SC8814_S19_5	202	20	660
TP3_1	SC8815_S20_1	203	4	3
TP3_2	SC8815_S20_2	204	111	177
TP3_3	SC8815_S20_3	205	138	492
TP3_5	SC8815_S20_5	206	70	407
TP3_8	SC8815_S20_8	208	112	5
TP3_9	SC8815_S20_9	207	5	176
SS1_1	SC8825_S9_1	209	207	545
SS1_2	SC8825_S9_2	210	164	498
SS1_3	SC8825_S9_3	211	97	270
SS1_4	SC8825_S9_4	212	7	1
SS2_1	SC8826_S10_1	213	226	765
SS3_1	SC8827_S11_1	214	85	357
SS3_2	SC8827_S11_2	215	23	658
SS3_4	SC8827_S11_4	216	113	172
AFH1_1	SC8828_S12_1	218	22	664
AFH1_10	SC8828_S12_10	217	27	656
AFH1_2	SC8828_S12_2	219	24	669
AFH1_3	SC8828_S12_3	220	3	15
AFH1_4	SC8828_S12_4	221	6	9
AFH1_5	SC8828_S12_5	222	159	514
AFH1_6	SC8828_S12_6	223	182	723
AFH1_7	SC8828_S12_7	224	83	354
AFH1_9	SC8828_S12_9	225	123	699
AFH2_1	SC8829_S13_1	226	1	14
AFH2_2	SC8829_S13_2	227	21	655
AFH2_3	SC8829_S13_3	228	158	512
AFH2_7	SC8829_S13_7	229	128	713
AFH3_1	SC8830_S14_1	230	14	629
