# Supplementary material for: Atmospheric chemosynthesis is phylogenetically and geographically widespread and contributes significantly to carbon fixation throughout cold deserts
Source: Research Square preprint supplement (doi:10.21203/rs.3.rs-948000/v1), 2021-10-13
Supplement: Supplementary file 8 [file 57cdaba26a05c1e2eeaed9b1.xlsx]

## Sheet: Sheet 1
Taxonomy (GTDB R95)	TR_1	TR_2	TR_3	NH_1	NH_2	NH_3	MP_1	MP_2	MP_3	TP_1	TP_2	TP_3	SS_1	SS_2	SS_3	AFH_1	AFH_2	AFH_3
p__Acidobacteriota;c__Acidobacteriae	0	0	0	0	0	0	0.000970949	0.00232572	0.0229951	0.00500325	0.00715359	0.010012	4.13661	2.32214	1.43678	0.0888691	1.22288	1.17185
p__Acidobacteriota;c__Blastocatellia	0.37824	0.0716332	24.6352	0.626959	13.6507	10.6188	0.16409	0.00232572	0.00574878	0.0650423	0.143072	0.0800961	1.44281	4.94946	1.41804	3.44368	1.95191	1.57199
p__Acidobacteriota;c__Vicinamibacteria	0	0	0.0143062	0	0	0.0142918	0	0	0	0.0100065	0.0214608	0.020024	0.120929	0.133511	0.293603	0.144412	0.135223	0.142908
p__Acidobacteriota;c__Vicinamibacteria_A	0	0	0	0	0	0	0	0	0	0.0150098	0.0143072	0.020024	0.0542096	0.0715239	0.787106	0.122195	0.905403	0.457306
p__Actinobacteriota;c__Acidimicrobiia	0.37824	0.34384	0.987124	0.0400187	0.0924428	0.514506	0.0796178	12.6654	0.287439	0.445289	0.686744	1.41169	0.946583	1.60214	0.593453	0.477672	0.458581	0.714541
p__Actinobacteriota;c__Actinomycetia	11.4807	9.82808	22.4464	6.80317	4.77621	17.0359	86.8737	36.6157	7.71141	73.6078	58.6666	52.9135	2.10583	1.6975	8.27086	13.1304	6.21436	5.82351
p__Actinobacteriota;c__Rubrobacteria	11.5474	19.8854	2.41774	2.10765	0.231107	11.7479	0.00291285	0.000930289	0	0.395257	0.822663	1.15138	0	0	0	0.0333259	0	0.00714541
p__Actinobacteriota;c__Thermoleophilia	31.0713	52.5788	28.5122	1.44734	4.46037	17.579	1.21272	15.213	19.4424	14.4444	23.2492	32.1085	14.9827	8.81652	20.0587	21.1953	6.26139	6.43087
p__Actinobacteriota;c__UBA4738	0.0222494	0.0286533	0.143062	0	0	0.0571674	0	0.000930289	0	0.080052	0.207454	0.340408	5.18327	0.7963	0.737131	0.477672	2.26939	5.30904
p__Bacteroidota;c__Bacteroidia	23.0504	6.24642	4.56366	17.2747	6.70981	24.7678	0.282546	0.00930289	0.0252946	0.160104	0.264683	0.0700841	0.00416997	0.0667557	1.54298	2.39947	5.53824	3.68703
p__Campylobacterota;c__Campylobacteria	0.700857	0.802292	0.472103	0.493564	0.731839	1.37202	0.0456346	0.0148846	0.0770336	0.360234	0.422062	0.660793	0.104249	0.104902	0.281109	0.577649	0.223411	0.43587
p__Chloroflexota;c__Chloroflexia	0.0111247	0	0	0	0	0	0.267011	0.974012	9.10032	0	0	0	0	0	0	0	0	0
p__Chloroflexota;c__Ellin6529	0.244744	0.673352	2.50358	0.0733676	0.285032	0.7003	7.61515	3.68534	1.20494	0.410267	0.65813	0.800961	1.62629	2.84188	1.98026	6.93179	2.56335	1.59343
p__Chloroflexota;c__Ktedonobacteria	0	0	0	0	0	0	0.00291285	0.00186058	0.0367922	0	0	0	0.0458696	0.00953652	0	0	0.00587924	0.00714541
p__Chloroflexota;c__UBA5177	0.0222494	0.0143266	0.0143062	0.00666978	0	0.0142918	0.0349542	0.0613991	0.220753	0	0	0	0.0125099	0.00953652	0.0249875	0.0222173	0.00587924	0.00714541
p__Cyanobacteria;c__Cyanobacteriia	5.51786	0.888252	2.73247	0	0.192589	0.0142918	0	0	0	0	0	0	0	0	1.94903	6.64297	6.41425	2.34369
p__Deinococcota;c__Deinococci	0.0222494	0.0573066	0.0143062	0.0266791	0.0462214	1.5721	0.434014	0	0	0.00500325	0.00715359	0	0	0	0	0	0	0
p__Dormibacterota;c__Dormibacteria	0.266993	0.186246	0.686695	0.0266791	0.053925	0.242961	0.668013	17.0643	49.0785	0.0700455	0.164533	0.230276	1.23431	2.18863	0.268616	0.155521	0.135223	0.142908
p__Eremiobacterota;c__Eremiobacteria	0	0	0	0	0	0	0.0058257	8.63029	7.48261	0	0	0	0.00833994	0	0	0	0	0
p__Firmicutes;c__Bacilli	1.31272	1.54728	0.9299	0.747015	1.09391	1.58639	0.0786469	0.0279087	0.151768	0.63041	0.829816	1.21145	0.221008	0.205035	0.530985	1.07754	0.482098	0.821722
p__Firmicutes_A;c__Clostridia	0	0	0	0	1.57153	0	0	0	0	0	0	0	0	0	0	0	0	0
p__Gemmatimonadota;c__Gemmatimonadetes	0.0111247	0.0143266	0.100143	0.0133396	0.0231107	0.142918	0.224289	0.00232572	0.0344927	0.115075	0.307604	0.260312	6.20491	22.921	1.17441	2.67718	1.91663	1.75063
p__Nitrospirota;c__Nitrospiria	0	0	0	0	0	0	0	0	0	0.00500325	0.0572287	0.020024	2.34769	5.86019	15.08	12.9749	4.72691	4.10861
p__Patescibacteria;c__Saccharimonadia	0	0	0	0	0	0	0	0	0	0	0	0	0.0166799	0.185962	0.00624688	0	0	0
p__Proteobacteria;c__Alphaproteobacteria	2.18044	1.7192	0.314735	7.65024	12.7263	4.44476	0.729183	0.946104	2.45933	6.71436	10.2296	4.02483	21.9299	18.1766	18.2221	8.7425	30.0429	27.2026
p__Proteobacteria;c__Gammaproteobacteria	11.7811	5.10029	3.89127	62.6559	53.2779	7.41746	0.396147	0.0381418	0.228801	2.28649	2.80421	4.32519	6.49264	7.70074	8.7956	15.2966	6.63766	7.95284
p__Thermoproteota;c__Bathyarchaeia	0	0	0	0	0	0	0	0	0	0	0	0	0	0	0	1.31082	0	0
p__Thermoproteota;c__Nitrososphaeria	0	0	0.0143062	0	0	0	0.196132	0.333974	0.699051	0.0850553	0.17884	0.170204	12.5182	1.73088	0.849575	0.688736	1.36398	2.85816
p__Verrucomicrobiota;c__Verrucomicrobiae	0	0.0143266	4.60658	0.00666978	0.0770357	0.15721	0.68549	3.70953	1.73038	0.0900585	0.257529	0.170204	18.2603	17.6092	15.6984	1.38858	20.5244	25.4591
