# Supplementary material for: Atmospheric chemosynthesis is phylogenetically and geographically widespread and contributes significantly to carbon fixation throughout cold deserts
Source: Research Square preprint supplement (doi:10.21203/rs.3.rs-948000/v1), 2021-10-13
Supplement: Supplementary file 9 [file 62a54228d263bf622c49b168.xlsx]

## Sheet: Sheet1
	The Ridge				New Harbour				Mitchell Peninsula				Tibetan Plateau				Spitsbergen				Alexandra Fjord Highlands
	TR1	TR2	TR3	Average	NH1	NH2	NH3	Average	MP1	MP2	MP3	Average	TP1	TP2	TP3	Average	SS1	SS2	SS3	Average	AFH1	AFH2	AFH3	Average
Reads before quality filtering	67439444	61145700	59373278	6.26528e+07	62879708	62159856	61660034	6.22332e+07	61652666	54471172	58035176	5.8053e+07	58839648	57520586	65916908	6.0759e+07	59829102	57171452	61799460	5.96e+07	57734894	69002626	77333068	6.80235e+07
Reads mapped before quality filtering	47034393	46222653	33285395	4.21808e+07	43696861	36564877	31963307	3.74083e+07	31157182	29026503	26775626	28986437	8357629	7994642	9942075	8764782	7318418	6207993	6712987	6746466	7745455	7053318	6805788	7.20152e+06
Fraction reads mapped before quality filtering	69.7432	75.5943	56.0612	67.1329	69.4928	58.8239	51.838	60.0516	50.5366	53.2878	46.1369	49.9871	14.2041	13.8987	15.0827	14.3952	12.2322	10.8586	10.8625	11.3178	13.4156	10.2218	8.80062	10.8127
Reads after quality filtering	57590008	52414968	52720454	54241810	53694848	52616544	51961844	5.27577e+07	52343660	45345102	48787870	48825544	49729750	48202380	55433330	51121820	51281158	49670788	53386090	51446012	50590734	60016698	66105382	5.89043e+07
Reads mapped after quality filtering	40367677	40572807	27032641	3.5991e+07	39155925	31197907	25583265	3.1979e+07	25723858	24478936	22882765	24361853	3133053	2802412	3658230	3.1979e+06	3160286	2318710	2711886	2730294	3768662	2980088	2493232	3.08066e+06
Fraction reads mapped after quality filtering	70.0949	77.4069	51.2754	66.2591	72.9231	59.293	49.2347	60.4836	49.1442	53.9836	46.9026	50.0101	6.30016	5.81385	6.59933	6.23778	6.16267	4.66816	5.07976	5.30353	7.44931	4.96543	3.7716	5.39545
Number of contigs	451765	296916	649729	466137	373407	541079	686307	533598	686986	463896	615893	588925	573394	622387	815977	670586	695859	670510	536696	634355	601559	782925	721591	702025
Number of contigs (> 1kb)	94651	65770	120734	93718.3	80864	100159	119819	100281	135648	66960	96474	99694	34056	44195	70463	49571.3	50652	48351	26469	41824	68847	58309	37397	54851
Number of contigs (> 10kb)	2280	2020	2714	2338	2483	2297	1990	2256.67	3530	3152	3673	3451.67	219	90	195	168	64	11	217	97.3333	456	191	147	264.667
Number of contigs (>100kb)	6	8	4	6	18	16	5	13	27	36	44	35.6667	0	0	0	0	0	0	3	1	0	0	5	1.66667
Longest contig	191115	209485	174925	191842	333045	308355	163942	268447	323674	267130	249187	279997	56802	32563	35404	41589.7	19269	14156	128414	53946.3	99488	98507	178220	125405
Total contig size	422955626	298838673	565360124	4.29051e+08	369030316	474048198	564585572	469221362	636883221	404866626	534694312	5.25481e+08	316565772	348501697	481160419	3.82076e+08	389154557	376634599	285852104	3.50547e+08	389957868	446098455	380038293	405364872
Average contig length	936.229	1006.48	870.148	937.617	988.279	876.116	822.643	895.679	927.069	872.753	868.161	889.328	552.091	559.944	589.674	567.236	559.243	561.714	532.615	551.191	648.245	569.784	526.667	581.566
GC content (%)	65	65	66	65.3333	62	62	63	62.3333	62	64	61	62.3333	66	66	66	66	61	61	61	61	62	59	59	60
N50	1253	1500	1080	1277.67	1436	1099	980	1171.67	1215	1091	1063	1123	542	559	601	567.333	549	568	524	547	677	573	518	589.333
N75	588	625	554	589	622	552	529	567.667	579	510	529	539.333	399	408	423	410	407	411	391	403	438	410	391	413
N90	398	404	384	395.333	395	384	376	385	394	373	375	380.667	337	340	345	340.667	341	341	334	338.667	348	341	334	341
L50	68597	38956	107375	71642.7	49844	87029	123605	86826	102237	58544	87380	82720.3	173184	189437	236978	199866	210034	206035	168241	194770	149191	232715	231193	204366
L75	196658	120029	297685	204791	152301	245786	326367	241485	300876	203259	275074	259736	344154	372889	476876	397973	417285	401803	327509	382199	330547	464099	443497	412714
L90	328418	209724	482402	340181	265296	400892	517345	394511	501369	342764	456252	433462	473847	513394	666386	551209	574295	552860	446393	524516	480858	643459	601561	575293
Predicted genes (Prokka)	407692	294941	543422	415352	343301	442743	536120	440721	605018	386615	500761	497465	271230	305081	430010	335440	348865	344601	245575	313014	356293	387674	311450	351806
Complete/partial 16S rRNA genes	68	65	120	84.3333	91	111	123	108.333	149	96	135	126.667	173	174	186	177.667	143	158	167	156	176	200	206	194
Complete/partial 5S rRNA genes	78	67	91	78.6667	80	88	109	92.3333	94	67	80	80.3333	100	71	107	92.6667	69	68	71	69.3333	77	83	67	75.6667
Complete/partial 23S rRNA genes	70	67	98	78.3333	77	85	99	87	132	91	107	110	135	104	140	126.333	91	115	109	105	116	137	142	131.667
Complete/partial 16S/5S/23S rRNA genes	216	199	309	241.333	248	284	331	287.667	375	254	322	317	408	349	433	396.667	303	341	347	330.333	369	420	415	401.333
Note: Reads filtered at 95% read identity, >75% read aligned
Reads before and after quality filtering , and GC content obtained from fastqc output
Number of contigs, Total contig size and predicted genes from Prokka output (txt)
Average contig length= total contig size/number of contigs
