# Supplementary material for: Atmospheric chemosynthesis is phylogenetically and geographically widespread and contributes significantly to carbon fixation throughout cold deserts
Source: Research Square preprint supplement (doi:10.21203/rs.3.rs-948000/v1), 2021-10-13
Supplement: Supplementary file 14 [file 2b6ecf78d2fa930102982b1b.xlsx]

## Sheet: rpIP_abundances_class
Taxonomy (rPlP)	TR_1	TR_2	TR_3	NH_1	NH_2	NH_3	MP_1	MP_2	MP_3	TP_1	TP_2	TP_3	SS_1	SS_2	SS_3	AFH_1	AFH_2	AFH_3
p__Asgardarchaeota:c__Heimdallarchaeia	0	0	0	0.0960373	0	0	0	0	0	0	0.121628	0	0	0	0.125037	0	0	0
p__Asgardarchaeota:c__Lokiarchaeia	0	0	0	0	0	0	0	0	0	0	0	0	0	0	0	0.117465	0	0.116865
p__Asgardarchaeota:c__Thorarchaeia	0	0	0	0	0	0	0	0	0	0	0	0	0	0.141742	0	0	0	0
p__Halobacteriota:c__Archaeoglobi	0	0	0	0	0	0	0	0	0	0	0	0	0	0	0	0	0.108764	0
p__Halobacteriota:c__Halobacteria	0	0.18651	0	0	0	0	0	0	0	0	0	0	0	0	0	0	0	0
p__Halobacteriota:c__Methanosarcinia	0	0	0	0	0	0	0	0	0	0	0	0.204912	0	0	0.125037	0	0	0
p__Hydrothermarchaeota:c__Hydrothermarchaeia	0	0	0	0	0	0	0	0	0	0	0	0	0	0	0	0	0	0.116865
p__Micrarchaeota:c__Micrarchaeia	0	0	0	0	0	0	0	0	0	0	0	0	0.15628	0	0	0	0	0
p__Nanoarchaeota:c__Nanoarchaeia	0	0	0	0	0	0	0.112272	0	0	0	0	0	0	0	0	0.117465	0	0
p__Thermoplasmatota:c__E2	0	0	0	0	0	0	0	0	0	0.265415	0	0	0	0	0	0	0	0
p__Thermoplasmatota:Unassigned	0	0	0	0.288697	0	0	0	0	0	0	0	0.20367	0	0	0	0	0	0.117577
p__Thermoproteota:c__Methanomethylicia	0	0	0	0	0	0	0	0.134448	0	0	0	0	0	0	0	0	0	0
p__Thermoproteota:c__Nitrososphaeria	0	0	0.199262	0	0	0	0.223182	0	0	2.18764	2.20785	2.6564	0.469786	0.143471	0.251599	1.17537	1.09228	0.703327
p__AABM5-125-24:c__AABM5-125-24	0	0	0.0996312	0	0	0	0	0	0	0	0	0	0	0	0	0	0	0
p__Acidobacteriota:c__Acidobacteriae	0	0	0	0	0.113097	0.210851	2.23795	4.04984	9.54814	0.242496	0.243257	0.305505	8.9032	6.69041	1.37693	0.940437	1.96173	4.69954
p__Acidobacteriota:c__Blastocatellia	0.389578	0	2.5977	0.576224	8.36915	1.16418	5.07128	0.694376	0.55129	0.972202	2.34802	0.614735	3.4552	4.86591	3.63599	4.59976	2.4074	2.94443
p__Acidobacteriota:c__Mor1	0	0	0	0	0	0	0	0	0	0	0	0	0	0	0	0.118181	0	0
p__Acidobacteriota:c__Thermoanaerobaculia	0	0	0	0.0960373	0	0	0	0	0	1.82389	0.12237	0.359527	3.59443	3.83482	1.78025	0.943302	1.20105	1.40665
p__Acidobacteriota:c__UBA6911	0	0	0	0	0	0	0	0	0	0	0	0	0	0	0.125037	0.118181	0	0.117577
p__Acidobacteriota:c__Vicinamibacteria_A	0	0	0	0	0	0	0	0	0	0	0	0	0.15628	0.426091	0.376636	0.470576	0.108764	0
p__Acidobacteriota:c__Vicinamibacteria	0	0	1.1002	0.0966229	0.676523	0.952687	0	0	0	2.1869	3.7905	2.14723	2.52321	3.18142	4.01491	6.03154	2.46709	1.7601
p__Acidobacteriota:Unassigned	0	0	0	0	0	0	0	0	0	0	0.121628	0	0	0	0	0	0.326956	0
p__Actinobacteriota:c__Acidimicrobiia	3.68515	2.91046	5.91834	1.54948	2.3058	7.95899	3.24635	12.2299	1.8284	7.2039	5.70022	6.83411	2.1775	4.42944	3.25935	2.47321	1.41791	2.93587
p__Actinobacteriota:c__Actinomycetia	15.8025	9.81814	26.9976	7.796	7.67	12.7398	34.2231	22.7365	5.68911	18.7676	11.5362	9.29989	6.45387	3.41305	11.0711	3.18087	5.75654	10.1573
p__Actinobacteriota:c__Coriobacteriia	0	0	0	0	0	0	0	0	0	0.242496	0.123112	0.713465	0.15628	0	0	0.117465	0.436383	0.117577
p__Actinobacteriota:c__Rubrobacteria	5.23524	23.6562	3.9081	4.53249	1.92059	12.1278	0.111591	0	0	4.39006	4.8859	4.62542	0.311612	0	0	0.473441	0.108764	0
p__Actinobacteriota:c__Thermoleophilia	45.2843	46.5703	34.2258	4.09974	12.0952	20.8395	10.199	24.3884	18.8588	27.0405	33.8668	33.0529	18.4486	12.4612	12.5495	19.015	8.30985	7.88054
p__Actinobacteriota:c__UBA9087	0	0.187077	1.22352	0.388248	0	1.49267	0	0	0	3.52358	5.30418	10.1202	1.24834	1.56954	2.38867	1.88445	2.07514	2.96153
p__Actinobacteriota:Unassigned	7.88777	0	0.348102	0	0.337233	0.210851	0	0	1.99119	0.121248	0.48948	0.935763	0.155332	0.142607	0.377399	0.941153	0	0.970549
p__Armatimonadota:c__Abditibacteria	0.096221	0	0	0	0	0.210851	0.336815	0	0.138452	0	0	0.102456	0	0	0	0.117465	0.108764	0.23373
p__Armatimonadota:c__BOG-944	0	0	0	0	0	0	0.557956	1.21413	2.61968	0	0	0	0	0	0.125037	0	0.217528	0.46746
p__Armatimonadota:c__Fimbriimonadia	0	0	0	0	0.112411	0	0.2504	0	0.276904	0.121248	0.121628	0	0	0.141742	0	0	0.437709	0.23373
p__Armatimonadota:Unassigned	0	0	0.0996312	0	0	0.105426	0.223182	0.135268	0.137613	0.121987	0.12237	0.204291	0	0.165942	0	0.117465	0.326292	0.58575
p__Bacteroidota:c__Bacteroidia	3.18703	0.745473	1.99627	5.69197	3.17356	5.39342	4.45752	0.404984	2.41829	0.728966	1.09614	0.306126	2.33946	3.16241	5.98196	4.12632	9.14415	9.93637
p__Bacteroidota:c__Ignavibacteria	0	0	0.100239	0	0	0	0	0	0	0	0	0	0	0.142607	0	0.236363	0.217528	0
p__Bacteroidota:c__Kapabacteria	0	0	0	0	0.113782	0	0	0	0.138452	0	0.121628	0	0	0	0.1258	0.118181	0.108764	0
p__Bacteroidota:c__Rhodothermia	0.386057	0.374154	0	0	0	0	0	0	0	0	0	0	0	0	0	0	0	0
p__Bacteroidota:c__SZUA-365	0	0	0	0	0	0	0	0	0	0	0	0	0.155332	0	0	0	0	0
p__Bacteroidota:c__UBA10030	0	0	0	0	0	0	0	0	0	0	0	0	0	0.284349	0	0	0.219518	0
p__Bdellovibrionota:c__Bacteriovoracia	0	0	0	0.0960373	0.563427	0	0	0	0	0	0	0	0	0	0	0	0	0
p__Bdellovibrionota:c__Bdellovibrionia_A	0	0	0	0	0	0	0	0	0.276065	0.121987	0	0	0.311612	0.141742	0	0	0.327619	0.23373
p__Bdellovibrionota:c__Bdellovibrionia	0	0	0	0	0.224822	0	0	0	0.275226	0	0.12237	0	0	0	0	0	0	0
p__Bdellovibrionota:c__Oligoflexia	0	0	0	0	0.563427	0	0.112272	0	0	0	0	0	0	0	0	0	0	0
p__Bdellovibrionota:c__UBA2394	0	0	0	0	0	0	0	0	0	0	0	0	0.311612	0	0	0	0	0
p__Bdellovibrionota:Unassigned	0	0	0	0.192075	0	0	0.335454	0	0.983428	0	0	0	0	0.141742	0	0	0.108764	0.117577
p__Chloroflexota:c__Anaerolineae	0	0	0.299501	0.0960373	0	0	0	0	0	0.243975	0.121628	0.204291	0.155332	0.143471	1.40438	0.822972	0.874755	0.46746
p__Chloroflexota:c__Chloroflexia	4.50009	3.94846	1.3268	4.94299	3.80827	6.9793	1.7875	0.539433	1.65555	2.35398	1.95644	2.45025	0	0.141742	0.75251	0.589474	0.654574	1.2905
p__Chloroflexota:c__Dehalococcoidia	0	0	0.100239	0.0960373	0	0.210851	0.821284	0.404984	0.983428	1.21544	1.10133	2.04042	0.465997	0.709575	0.502436	0.23493	0.653911	0.351307
p__Chloroflexota:c__Ellin6529	0.386644	1.02495	8.19285	0.480186	3.39153	1.81795	1.78954	1.36334	0.276065	3.90211	5.88192	4.52296	5.46316	4.57205	5.02055	5.53805	4.06406	2.34656
p__Chloroflexota:c__Ktedonobacteria	0	0	0	0	0	0	0.894771	0.673881	12.391	0	0	0	0.311612	0	0	0	0	0
p__Chloroflexota:c__UBA5177	0	0	0	0	0	0	0	2.0241	0.137613	0	0	0	0	0	0	0	0	0
p__Chloroflexota:c__UBA6077	0	0	0.100239	0	0	0	0	1.21413	0.412838	0.744492	0.85214	1.53063	0.155332	0.141742	0.375874	0	0.327619	0
p__Chloroflexota:Unassigned	0	0	0.100846	0	0.113097	0.105426	0.585854	2.57009	0.688903	0.121248	0.731253	0.612251	0.779504	0	0.500911	0.237079	0.326292	0
p__Cyanobacteria:c__Cyanobacteriia	0.096221	0	0.0996312	0	0	0	0.223863	0.403345	1.1051	0	0	0	0.155332	0	0.75251	1.17823	2.29399	2.26604
p__Cyanobacteria:c__Vampirovibrionia	0	0	0	0	0	0	0	0	0	0	0	0.20367	0.155332	0.142607	0	0.118181	0	0
p__Deinococcota:c__Deinococci	0.193615	0.765882	0	0.19266	0.677209	6.98123	0.112272	0	0	0.121987	0	0	0	0	0.1258	0	0	0
p__Dependentiae:c__Babeliae	0	0	0	0	0	0	0	0	0	0	0	0	0	0.141742	0	0.117465	0.111417	0
p__Desulfobacterota_B:c__Binatia	0	0	0	0	0	0	0	0	0	0	0.364885	0.20367	0.623224	0.852182	0.376636	0.471293	0.437046	0.11829
p__Desulfobacterota:c__Desulfobacteria	0	0	0	0	0	0	0.112272	0	0	0	0	0	0	0	0	0	0	0
p__Desulfobacterota:c__GWC2-55-46	0	0	0	0	0	0	0	0	0	0	0	0	0	0	0	0	0.109427	0
p__Desulfobacterota:Unassigned	0	0	0	0	0	0	0	0	0.275226	0	0	0	0	0	0	0	0	0
p__Dormibacterota:c__Dormibacteria	0	0	0	0	0	0	0.335454	10.8649	12.2878	0	0	0	1.92745	1.56521	0.1258	0	0	0.116865
p__Eisenbacteria:c__RBG-16-71-46	0	0	0	0	0	0	0	0	0	0	0	0	0.623224	0.284349	0.500911	0.471293	1.19707	0.468172
p__Elusimicrobiota:c__Elusimicrobia	0	0	0	0	0	0	0	0	0	0	0	0	0.466944	0.31287	0.252362	0.118181	0.563717	0.468885
p__Eremiobacterota:c__Eremiobacteria	0	0	0	0	0	0	0.223182	5.12953	5.5708	0	0	0	0.310665	0.330156	0	0	0.218191	0.117577
p__Fibrobacterota:c__Chitinivibrionia	0.0968077	0	0	0	0	0	0	0	0.139291	0	0	0	0	0	0.251599	0	0	0
p__Fibrobacterota:c__Fibrobacteria	0.096221	0	0	0	0	0	0	0	0.137613	0	0	0	0	0	0	0	0	0
p__Fibrobacterota:Unassigned	0	0.232996	0	0	0	0	0	0	0	0	0	0	0	0	0	0	0	0
p__Firmicutes_A:c__Clostridia_A	0	0	0	0	0	0	0	0.134448	0	0	0	0	0	0	0	0	0	0
p__Firmicutes_A:c__Clostridia	0	0	0	0	0	0	0.111591	0	0	0	0	0	0	0	0	0	0	0
p__Firmicutes_B:c__Desulfitobacteriia	0	0	0	0	0	0.105426	0	0	0	0	0	0	0	0	0	0	0	0
p__Firmicutes_B:c__Desulfotomaculia	0	0	0	0	0	0	0	0	0	0	0	0.205533	0	0	0	0.118898	0.326292	0
p__Firmicutes_B:c__Moorellia	0	0	0	0	0.451701	0	0	0	0	0	0	0	0	0	0	0	0	0
p__Firmicutes_B:c__Syntrophomonadia	0	0	0	0	0	0.105426	0	0	0	0	0	0	0	0	0	0	0	0
p__Firmicutes_D:c__Dethiobacteria	0	0	0	0	0	0	0	0	0	0	0	0.102456	0	0	0	0	0	0
p__Firmicutes_D:c__UBA994	0	0	0	0	0	0	0	0	0	0	0	0	0	0	0	0	0	0.117577
p__Firmicutes_F:c__Halanaerobiia	0	0	0	0	0	0	0	0	0	0.147863	0.243257	0.204291	0	0	0	0.118181	0	0
p__Firmicutes_G:c__Limnochordia	0	0	0	0	0	0	0	0	0	0	0	0	0	0	0	0	0.108764	0
p__Firmicutes:c__Bacilli	0.444729	1.31521	0	0	0.337919	0	0	0	0	0.363744	0.364885	0.407961	0	0	0	0.235646	0	0
p__Gemmatimonadota:c__Gemmatimonadetes	5.24522	4.87137	2.00295	5.19831	8.24303	6.24646	5.03045	0.673881	0.137613	4.73976	5.32346	7.53827	6.45577	12.4215	6.62849	7.42322	4.71333	3.04918
p__Gemmatimonadota:Unassigned	0	0	0	0	0	0	0.111591	0	0	0	0.121628	0	0.155332	0	0	0	0	0
p__Methylomirabilota:c__Methylomirabilia	0	0	0	0	0	0	0	0	0	0.363744	0.486513	0.101835	0.155332	0.283484	0.876785	1.64666	0.326292	0.585037
p__Myxococcota_A:c__UBA9160	0	0	0	0	0	0	0	0	0	0	0	0	0	0.141742	0	0.118181	0	0
p__Myxococcota:c__Bradimonadia	0	0	0	0	0	0	0	0	0	0.121987	0	0	0	0	0	0	0	0
p__Myxococcota:c__Myxococcia	0	0	0	0	0.45033	0	0	0	0	0.365962	0	0.305505	0.312559	0	0.251599	0.235646	0.109427	0.117577
p__Myxococcota:c__Polyangia	0.29101	0	0.398525	0.385906	0	0	1.11931	0.269716	1.10342	0.612154	0.243257	0.205533	1.10343	1.14172	1.25495	0.587325	0.980204	1.0525
p__Myxococcota:c__UBA796	0	0	0	0	0	0	0	0	0	0.121987	0	0	0	0	0.125037	0	0	0
p__Myxococcota:c__UBA9042	0	0	0	0	0	0	0	0	0	0	0	0	0	0.141742	0	0	0	0
p__Myxococcota:c__XYA12-FULL-58-9	0	0	0	0	0	0	0	0	0	0	0	0	0	0	0	0	0.108764	0
p__Myxococcota:Unassigned	0	0	0	0.481943	0	0	0	0	0	0	0	0	0	0.143471	0	0	0	0
p__Nitrospirota:c__Nitrospiria	0	0	0	0	0	0	0	0.134448	0	0.243235	0.365627	0.101835	0.62133	1.27741	0.778433	0.392505	0.872103	0.350595
p__Nitrospirota:Unassigned	0	0	0	0	0	0	0	0	0	0	0.243257	0.102456	0.155332	0	0	0	0.218191	0.116865
p__Omnitrophota:c__Koll11	0	0	0	0	0	0	0	0	0	0	0	0	0	0	0	0.117465	0	0
p__Patescibacteria:c__ABY1	0	0	0	0	0	0	0.900895	0.674701	0.828194	0	0	0	0	0.285213	0	0.117465	0	0
p__Patescibacteria:c__Andersenbacteria	0	0	0	0	0	0	0	0	0	0	0	0	0	0	0	0.23493	0.108764	0
p__Patescibacteria:c__Dojkabacteria	0	0	0	0	0	0	0	0	0	0	0	0	0.155332	0	0	0	0	0
p__Patescibacteria:c__Doudnabacteria	0	0	0.0996312	0	0	0	0	0	0	0	0	0	0	0.426955	0.125037	0.118181	0	0
p__Patescibacteria:c__Gracilibacteria	0	0	0	0	0	0	0	0	0	0	0	0	0	0	0	0.117465	0	0
p__Patescibacteria:c__Microgenomatia	0	0	0	0	0	0.105426	0.223863	0	0	0.121248	0	0.209258	0.622277	0.286942	0.125037	0.235646	0.984846	0.116865
p__Patescibacteria:c__Paceibacteria	0	0	0	0	0.112411	0	0.45453	0	0	0	0	0	1.2455	0.426955	0	0.352395	0.43572	0.243706
p__Patescibacteria:c__Saccharimonadia	0.096221	0.0935385	0.398525	0	0.112411	0.210851	2.46385	0	0	0.242496	0.245482	0.204291	1.09301	0.994788	0.250837	0.23493	1.1984	0.620667
p__Patescibacteria:c__UBA1384	0	0	0	0	0	0	0.111591	0	0	0	0	0	0	0	0.125037	0	0	0
p__Patescibacteria:Unassigned	0	0	0	0	0.337233	0	0.111591	0	0	0.121987	0	0	0	0	0	0	0	0
p__Planctomycetota:c__Brocadiae	0.096221	0	0	0	0	0	0	0	0	0	0	0	0	0	0	0	0	0
p__Planctomycetota:c__GCA-002687715	0	0	0	0	0	0	0	0	0	0	0	0	0.155332	0	0	0	0	0
p__Planctomycetota:c__Phycisphaerae	1.16287	0.839012	0.298894	2.52918	3.62183	1.4811	0.791345	0	0.412838	0.608458	1.34162	0.714707	0.875166	1.16937	1.00182	0.589474	1.528	1.17221
p__Planctomycetota:c__Planctomycetes	0.096221	0	0	0	0.224822	0	0	0.944417	0.276065	0.849475	0.85214	0.409202	0.780451	0.426091	0.87526	1.29641	0.544484	0.58575
p__Planctomycetota:c__UBA1135	0	0	0.0996312	0	0	0	0	0	0	0.121248	0	0	0.155332	0	0.1258	0	0	0.133967
p__Planctomycetota:c__UBA8108	0	0	0	0	0	0	0	0	0.137613	0	0	0	0	0	0	0.236363	0	0
p__Planctomycetota:c__UBA8742	0	0	0	0	0	0	0	0	0	0	0	0	0	0	0	0	0.109427	0.116865
p__Planctomycetota:Unassigned	0.0968077	0	0	0	0	0	0	0	0	0.121987	0	0.102456	0	0	0	0	0.108764	0
p__Poribacteria:c__WGA-4E	0	0	0	0	0	0	0	0	0	0.121987	0.12237	0	0	0	0	0	0	0
p__Proteobacteria:c__Alphaproteobacteria	2.14972	1.80671	0.62391	16.8212	7.11412	10.1196	3.01773	1.75193	7.35641	7.31998	4.15094	2.78245	10.6573	9.53908	14.0103	14.1273	17.3757	16.944
p__Proteobacteria:c__Gammaproteobacteria	1.74254	0.280615	0.79948	42.1194	29.7252	1.17254	5.49246	0.539433	0.995175	3.28109	1.83184	0.917135	6.77117	6.84511	10.2996	9.06486	9.92274	10.4452
p__Proteobacteria:c__Magnetococcia	0	0	0	0	0	0	0	0.134448	0.276904	0	0	0	0	0	0	0	0	0
p__Proteobacteria:c__Zetaproteobacteria	0	0	0	0	0	0	0	0	0	0	0	0	0	0.141742	0	0.117465	0	0
p__Spirochaetota:c__Spirochaetia	0	0	0	0	0	0	0	0	0	0.150821	0.12237	0	0	0	0	0	0.333588	0.11829
p__Sumerlaeota:c__Sumerlaeia	0.288663	0.279482	0	0.963886	1.57581	0.74055	0	0	0	0.121987	0	0	0	0	0	0	0	0
p__Tectomicrobia:c__Entotheonellia	0	0	0	0	0	0	0	0	0	0.121248	0	0.101835	0	0	0.125037	0	0.329608	0.116865
p__UBA10199:c__UBA10199	0	0	0	0	0	0	0	0	0	0	0	0	0	0	0	0.235646	0	0
p__Verrucomicrobiota_A:c__Chlamydiia	0	0	0	0	0	0	0	0	0.277743	0.121248	0	0	0	0.142607	0.1258	0.117465	0.108764	0.116865
p__Verrucomicrobiota:c__Kiritimatiellae	0	0	0	0	0	0	0	0	0	0	0	0	0	0	0	0	0.108764	0
p__Verrucomicrobiota:c__Verrucomicrobiae	0.192442	0	6.14433	0.19266	0.449645	0	11.4748	3.38006	6.13048	0.121248	0	0.101835	5.14207	8.80357	3.63599	2.71172	7.55778	6.4632
p__Verrucomicrobiota:Unassigned	0	0	0	0	0	0	0	0	0	0	0	0	0	0	0	0	0	0.116865
p__Zixibacteria:c__MSB-5A5	0	0	0	0	0	0	0	0.186916	0.137613	0	0	0.102456	0	0	0	0.118181	0.108764	0
Unassigned:Unassigned	0.773875	0.0935385	0.0996312	0	1.01444	0.210851	0	0	0.137613	0.607718	0.486513	0.624049	0.466944	0.142607	0.626711	1.53134	0.545147	0.116865
