# Supplementary material for: Atmospheric chemosynthesis is phylogenetically and geographically widespread and contributes significantly to carbon fixation throughout cold deserts
Source: Research Square preprint supplement (doi:10.21203/rs.3.rs-948000/v1), 2021-10-13
Supplement: Supplementary file 15 [file 4f20531ad4e34930f57219d1.xlsx]

## Sheet: Sheet1
			Relative abundance within sample (%)
Bin ID/Genome	Bin #	Phylogeny	All Samples	TR1	TR2	TR3	NH1	NH2	NH3	MP1	MP2	MP3	TP1	TP2	TP3	SS1	SS2	SS3	AFH1	AFH2	AFH3	Completeness (%)	Contamination (%)	Genomes (#)	Genome Size (bp)	Contigs (#)	N50 (Contigs)	Mean contig length (bp)	GC Content (%)	Predicted genes (#)
TR1_1	45	d__Bacteria;p__Actinobacteriota;c__Actinomycetia;o__Euzebyales;f__Euzebyaceae;g__Euzebya;s__	0-0.3392	0.3392	0.11	0.0199	0.0046	0	0.0039	0	0	0	0	0	0	0	0	0	0	0	0	98.29	0.85	901	3966584	262	25131	15139	64.7	4288
TR1_10	180	d__Bacteria;p__Gemmatimonadota;c__Gemmatimonadetes;o__SG8-23;f__SKRI01;g__;s__	0-0.3433	0.3433	0.0718	0	0.0534	0	0	0	0	0	0	0	0	0	0	0	0	0	0	86.3	4.6	2993	4285110	897	5822	4777	65.9	4676
TR1_13	197	d__Bacteria;p__Proteobacteria;c__Alphaproteobacteria;o__Rhodobacterales;f__Rhodobacteraceae;g__Amaricoccus;s__	0-0.2286	0.2286	0.0874	0.0034	0.1464	0.0122	0.0162	0	0	0	0	0	0	0	0	0	0	0	0	84.4	7.6	468	3061875	660	5529	4639	66.8	3577
TR1_14	46	d__Bacteria;p__Actinobacteriota;c__Actinomycetia;o__Mycobacteriales;f__SCTD01;g__SCTD01;s__	0-0.7431	0.7431	0.0535	0.0168	0.0096	0.0041	0.01	0	0	0	0	0	0	0	0	0	0	0	0	93.46	8.62	488	3596604	597	8496	6024	71.3	4179
TR1_15	193	d__Bacteria;p__Planctomycetota;c__Phycisphaerae;o__UBA1161;f__UBA1161;g__;s__	0-0.1922	0.1922	0.1372	0	0.0197	0	0	0	0	0	0	0	0	0	0	0	0	0	0	89.19	4.08	2921	4048633	585	8732	6920	64.5	4101
TR1_18	44	d__Bacteria;p__Actinobacteriota;c__Actinomycetia;o__Euzebyales;f__;g__;s__	0-0.1894	0.1894	0.0997	0.0132	0.0229	0	0	0	0	0	0	0	0	0	0	0	0	0	0	70.28	0.85	901	2006779	638	3383	3145	62.4	2467
TR1_21	74	d__Bacteria;p__Actinobacteriota;c__Rubrobacteria;o__Rubrobacterales;f__Rubrobacteraceae;g__SIRX01;s__	0-2.3405	2.1664	2.3405	0.0088	0.0245	0	0	0	0	0	0	0	0	0	0	0	0	0	0	74.5	6.62	732	2153320	650	3660	3312	60.5	2806
TR1_23	124	d__Bacteria;p__Bacteroidota;c__Bacteroidia;o__Cytophagales;f__Cyclobacteriaceae;g__;s__	0-0.2171	0.2171	0.0574	0	0.0185	0	0	0	0	0	0	0	0	0	0	0	0	0	0	59.52	2.58	47	2738409	1016	2689	2695	50.1	3476
TR1_25	131	d__Bacteria;p__Bacteroidota;c__Bacteroidia;o__Flavobacteriales;f__Flavobacteriaceae;g__Gillisia;s__	0-0.5874	0.5874	0.1072	0	0.0483	0	0.009	0	0	0	0	0	0	0	0	0	0	0	0	51.72	0	5449	1856929	159	20011	11678	37.8	1773
TR1_27	199	d__Bacteria;p__Proteobacteria;c__Alphaproteobacteria;o__Sphingomonadales;f__Sphingomonadaceae;g__1-14-0-65-65-10;s__	0-0.1914	0.1914	0.0049	0	0.0053	0	0	0	0	0	0	0	0	0	0	0	0	0	0	52.39	3.79	26	1439262	549	2694	2621	64.8	1801
TR1_29	215	d__Bacteria;p__Proteobacteria;c__Gammaproteobacteria;o__Xanthomonadales;f__Xanthomonadaceae;g__Lysobacter;s__	0-0.2058	0.2058	0.029	0	0.0243	0	0	0	0	0	0	0	0	0	0	0	0	0	0	53.61	3.45	5449	2319965	792	3126	2929	66.5	2599
TR1_3	210	d__Bacteria;p__Proteobacteria;c__Gammaproteobacteria;o__Xanthomonadales;f__Xanthomonadaceae;g__Luteimonas;s__	0-0.6971	0.6971	0.1145	0.0322	0.0702	0	0	0	0	0	0	0	0	0	0	0	0	0	0	97.13	6.16	55	2971158	343	14557	8662	66.3	2961
TR1_30	75	d__Bacteria;p__Actinobacteriota;c__Rubrobacteria;o__Rubrobacterales;f__Rubrobacteraceae;g__SIRX01;s__	0-0.2201	0.1571	0.2201	0.0203	0.014	0	0.0223	0	0	0	0	0	0	0	0	0	0	0	0	55.88	6.21	732	2677308	1060	2552	2525	60.5	3653
TR1_34	187	d__Bacteria;p__Myxococcota;c__Polyangia;o__Polyangiales;f__SG8-38;g__;s__	0-0.2066	0.2066	0.0138	0	0	0	0	0	0	0	0	0	0	0	0	0	0	0	0	54.76	8.55	901	3525499	1095	3569	3219	68.1	4065
TR1_4	16	d__Bacteria;p__Acidobacteriota;c__Blastocatellia;o__Pyrinomonadales;f__Pyrinomonadaceae;g__QQUY01;s__	0-0.2725	0.2725	0	0.0149	0.0186	0	0	0	0	0	0	0	0	0	0	0	0	0	0	91.88	3.94	2258	3673987	599	8975	6133	40.1	4162
TR1_5	201	d__Bacteria;p__Proteobacteria;c__Alphaproteobacteria;o__Sphingomonadales;f__Sphingomonadaceae;g__Sphingomonas_A;s__	0-1.7477	0.257	0.004	0	1.7477	0	0	0	0	0	0	0	0	0	0	0	0	0	0	98.23	1.9	564	2328038	96	39380	24250	65.6	2374
TR1_8	90	d__Bacteria;p__Actinobacteriota;c__Thermoleophilia;o__Solirubrobacterales;f__Solirubrobacteraceae;g__;s__	0-8.5406	8.5406	5.5947	0.164	0.1649	0.0099	0.1005	0	0	0	0	0	0	0	0	0	0	0	0	93.87	4.62	732	3387498	623	7379	5437	72.5	4083
TR1_9	102	d__Bacteria;p__Actinobacteriota;c__Thermoleophilia;o__Solirubrobacterales;f__Solirubrobacteraceae;g__SEOHO-28;s__	0-0.4271	0.4271	0.1846	0.0115	0.0113	0.0038	0.0134	0.0069	0	0	0	0	0	0	0	0	0	0	0	92.74	6.52	732	6042673	1049	8161	5760	70.4	6974
TR2_1	176	d__Bacteria;p__Gemmatimonadota;c__Gemmatimonadetes;o__SG8-23;f__SKRI01;g__;s__	0-0.3984	0.3631	0.3984	0.0152	0.0202	0	0	0	0	0	0	0	0	0	0	0	0	0	0	96.7	4.95	2993	3247726	513	8731	6330	68.7	3618
TR2_10	73	d__Bacteria;p__Actinobacteriota;c__Rubrobacteria;o__Rubrobacterales;f__Rubrobacteraceae;g__Rubrobacter_A;s__	0-0.4911	0.4911	0.4281	0.0354	0.2747	0.0089	0.3534	0	0	0	0	0	0	0	0	0	0	0	0	84.8	4.31	732	2121915	568	4374	3735	64.5	2626
TR2_12	30	d__Bacteria;p__Actinobacteriota;c__Acidimicrobiia;o__Acidimicrobiales;f__SIRW01;g__;s__	0-0.3274	0.3274	0.2151	0.0338	0.0052	0.0051	0.0068	0	0	0	0	0	0	0	0	0	0	0	0	87.83	3.85	901	2508436	602	4737	4166	69.5	3162
TR2_13	181	d__Bacteria;p__Gemmatimonadota;c__Gemmatimonadetes;o__SG8-23;f__SKRI01;g__;s__	0-0.3115	0.1216	0.3115	0	0.0069	0	0	0	0	0	0	0	0	0	0	0	0	0	0	82.79	6.04	2993	3384717	947	4125	3574	68.1	3949
TR2_16	151	d__Bacteria;p__Chloroflexota;c__Chloroflexia;o__Thermomicrobiales;f__UBA6265;g__;s__	0-0.2729	0.0742	0.2729	0.0119	0.0148	0.0067	0.006	0	0	0	0	0	0	0	0	0	0	0	0	85.69	6.6	924	3718642	667	7027	5575	62.8	3909
TR2_2	200	d__Bacteria;p__Proteobacteria;c__Alphaproteobacteria;o__Sphingomonadales;f__Sphingomonadaceae;g__Sphingomonas_A;s__	0-0.8445	0.0993	0.8445	0	0.0312	0	0.008	0	0	0	0	0	0	0	0	0	0	0	0	96.9	1.11	564	2978258	141	72234	21122	65	3132
TR2_20	66	d__Bacteria;p__Actinobacteriota;c__Actinomycetia;o__Streptosporangiales;f__;g__;s__	0-0.7817	0.0534	0.2223	0.7817	0.0124	0.0083	0.0115	0	0	0	0	0	0	0	0	0	0	0	0	78.97	9.67	5449	2993033	654	5816	4576	69.9	3636
TR2_22	34	d__Bacteria;p__Actinobacteriota;c__Acidimicrobiia;o__Acidimicrobiales;f__Ilumatobacteraceae;g__Ilumatobacter;s__	0-0.1708	0.1103	0.1708	0.01	0.0079	0.0038	0.0042	0	0	0	0	0	0	0	0	0	0	0	0	63.49	4.62	901	3241289	1219	2716	2658	66.7	4081
TR2_23	88	d__Bacteria;p__Actinobacteriota;c__Thermoleophilia;o__Solirubrobacterales;f__70-9;g__RSA11;s__	0-0.184	0.0256	0.184	0.0995	0.0341	0	0	0	0	0	0	0	0	0	0	0	0	0	0	56.84	3.68	732	1561204	587	2768	2659	67.7	2064
TR2_26	106	d__Bacteria;p__Actinobacteriota;c__Thermoleophilia;o__Solirubrobacterales;f__Thermoleophilaceae;g__;s__	0-0.193	0.0794	0.193	0.0289	0.0389	0.0126	0.0264	0	0	0	0	0	0	0	0	0	0	0	0	58.93	9.31	5449	2291113	859	2753	2667	70.6	2923
TR2_3	177	d__Bacteria;p__Gemmatimonadota;c__Gemmatimonadetes;o__SG8-23;f__SKRI01;g__;s__	0-0.3889	0.1078	0.3889	0	0	0	0	0	0	0	0	0	0	0	0	0	0	0	0	96.64	4.95	2993	3461900	285	19004	12147	65.7	3386
TR2_4	175	d__Bacteria;p__Gemmatimonadota;c__Gemmatimonadetes;o__SG8-23;f__SKRI01;g__;s__	0-0.5207	0.0646	0.4188	0.0031	0.3272	0.5207	0.3038	0	0	0	0	0	0	0	0	0	0	0	0	97.8	4.4	2993	4891088	534	20323	9159	64.1	5444
TR2_5	146	d__Bacteria;p__Chloroflexota;c__Chloroflexia;o__Thermomicrobiales;f__UBA6265;g__;s__	0-0.4436	0.2334	0.1756	0.0159	0.4436	0.1151	0.0352	0	0	0	0	0	0	0	0	0	0	0	0	93.77	1.57	924	3289696	318	15959	10344	62.5	3352
TR2_6	87	d__Bacteria;p__Actinobacteriota;c__Thermoleophilia;o__Solirubrobacterales;f__70-9;g__;s__	0-0.435	0.435	0.3832	0.0033	0.0577	0	0	0	0	0	0	0	0	0	0	0	0	0	0	95.98	1.95	732	2899711	354	12466	8191	68.8	3146
TR2_7	139	d__Bacteria;p__Chloroflexota;c__Ellin6529;o__QHBO01;f__QHBO01;g__QHBO01;s__	0-0.455	0.1084	0.455	0.0072	0.0025	0	0.0152	0	0	0	0	0	0	0	0	0	0	0	0	91.67	1.85	924	2155422	226	13629	9537	68.1	2314
TR2_8	28	d__Bacteria;p__Actinobacteriota;c__Acidimicrobiia;o__Acidimicrobiales;f__SIRW01;g__;s__	0-0.4329	0	0.4329	0	0	0	0	0	0	0	0	0	0	0	0	0	0	0	0	94.87	1.36	901	2604303	405	9127	6430	71.6	2986
TR2_9	148	d__Bacteria;p__Chloroflexota;c__Chloroflexia;o__Thermomicrobiales;f__UBA6265;g__;s__	0-0.3801	0.188	0.3801	0	0.0238	0	0	0	0	0	0	0	0	0	0	0	0	0	0	94.34	4.25	924	3282128	375	11962	8752	63	3372
TR3_1	110	d__Bacteria;p__Actinobacteriota;c__UBA4738;o__;f__;g__;s__	0-0.4144	0	0	0.4144	0	0	0	0	0	0	0	0	0	0	0	0	0	0	0	95.73	3.7	901	3041444	194	29631	15677	66.7	3230
TR3_10	222	d__Bacteria;p__Verrucomicrobiota;c__Verrucomicrobiae;o__Chthoniobacterales;f__UBA10450;g__;s__	0-0.355	0	0	0.355	0	0	0	0	0	0	0	0	0	0	0	0	0	0	0	94.95	4.05	88	3188164	256	18684	12453	60.1	3352
TR3_11	179	d__Bacteria;p__Gemmatimonadota;c__Gemmatimonadetes;o__SG8-23;f__SKRI01;g__;s__	0-0.2116	0.0506	0.0162	0.2116	0.0029	0	0	0	0	0	0	0	0	0	0	0	0	0	0	83.75	3.3	2993	2216038	617	3979	3591	69.2	2637
TR3_12	92	d__Bacteria;p__Actinobacteriota;c__Thermoleophilia;o__Solirubrobacterales;f__Solirubrobacteraceae;g__;s__	0-3.265	0	0	3.265	0	0	0.0346	0	0	0	0.0041	0.0037	0.005	0	0	0	0	0	0	94.63	8.29	732	3382666	284	20580	11910	71	3744
TR3_13	69	d__Bacteria;p__Actinobacteriota;c__Rubrobacteria;o__Rubrobacterales;f__Rubrobacteraceae;g__SIRX01;s__	0-0.3476	0	0	0.3476	0	0	0.0074	0	0	0	0	0	0	0	0	0	0	0	0	80.88	5.48	732	3667486	661	6501	5548	64.1	4376
TR3_14	141	d__Bacteria;p__Chloroflexota;c__Ellin6529;o__QHBO01;f__QHBO01;g__CF-167;s__	0-0.518	0	0	0.518	0.022	0.0396	0.0484	0	0	0	0	0	0	0	0	0	0	0	0	93.52	7.51	924	2829969	166	35470	17048	67.1	3028
TR3_16	48	d__Bacteria;p__Actinobacteriota;c__Actinomycetia;o__Mycobacteriales;f__Geodermatophilaceae;g__;s__	0-0.6463	0	0	0.6463	0.1242	0.0349	0.027	0	0	0	0	0	0	0	0	0	0	0	0	94.79	8.35	274	5010526	552	23984	9077	69.3	5431
TR3_17	64	d__Bacteria;p__Actinobacteriota;c__Actinomycetia;o__Propionibacteriales;f__Nocardioidaceae;g__;s__	0-0.5765	0	0.0045	0.5765	0.0284	0.0703	0.0586	0	0	0	0	0	0	0	0	0	0	0	0	90.38	4.62	387	3121308	477	9818	6543	68.9	3516
TR3_19	82	d__Bacteria;p__Actinobacteriota;c__Thermoleophilia;o__Gaiellales;f__Gaiellaceae;g__GMQP-bins7;s__	0-0.3011	0	0	0.3011	0	0	0	0	0	0	0	0	0	0	0	0	0.0135	0	0	63.36	3.45	732	1732344	207	10977	8368	67.4	1931
TR3_2	135	d__Bacteria;p__Chloroflexota;c__Ellin6529;o__CSP1-4;f__CSP1-4;g__Palsa-1032;s__	0-0.5177	0	0	0.5177	0.0424	0.0188	0.0065	0	0	0	0	0	0	0	0	0	0	0	0	89.35	1.23	924	2608149	242	18168	10777	69	2662
TR3_20	105	d__Bacteria;p__Actinobacteriota;c__Thermoleophilia;o__Solirubrobacterales;f__Thermoleophilaceae;g__;s__	0-1.8121	0.0264	0.0246	1.8121	0.008	0.0088	0.0109	0	0	0	0	0	0	0	0	0	0	0	0	63.35	3.1	732	1771600	403	5055	4396	72.4	2126
TR3_21	229	d__Bacteria;p__Verrucomicrobiota;c__Verrucomicrobiae;o__Chthoniobacterales;f__UBA10450;g__Palsa-1392;s__	0-0.456	0	0	0.456	0	0	0	0	0	0	0	0	0	0	0	0	0	0	0	77.63	8.11	88	2945702	267	19194	11032	60.7	3033
TR3_22	224	d__Bacteria;p__Verrucomicrobiota;c__Verrucomicrobiae;o__Chthoniobacterales;f__UBA10450;g__;s__	0-0.2281	0	0	0.2281	0	0	0	0	0	0	0	0	0	0	0	0	0	0	0	70.8	8.78	88	2652344	691	4426	3838	63.5	2941
TR3_23	63	d__Bacteria;p__Actinobacteriota;c__Actinomycetia;o__Propionibacteriales;f__;g__;s__	0-0.2768	0.01	0.0102	0.2768	0.0297	0.03	0.0715	0	0	0	0	0	0	0	0	0	0	0	0	73.94	9.59	387	4298728	889	6049	4835	70.1	4985
TR3_3	136	d__Bacteria;p__Chloroflexota;c__Ellin6529;o__CSP1-4;f__CSP1-4;g__Palsa-1032;s__	0-0.5416	0	0	0.5416	0.0195	0.0122	0.0035	0	0	0	0	0	0	0	0	0	0	0	0	92.59	3.81	924	2399080	203	20811	11818	68.3	2473
TR3_4	61	d__Bacteria;p__Actinobacteriota;c__Actinomycetia;o__Nitriliruptorales;f__;g__;s__	0-0.2743	0.0342	0.0041	0.2743	0.0485	0	0	0	0	0	0	0	0	0	0	0	0	0	0	94.21	1.85	901	3160782	721	5238	4383	71.3	3471
TR3_41	76	d__Bacteria;p__Actinobacteriota;c__Rubrobacteria;o__Rubrobacterales;f__Rubrobacteraceae;g__SIRX01;s__	0-0.1698	0.0194	0.0142	0.1698	0.0186	0.0048	0.0315	0	0	0	0	0	0	0	0	0	0	0	0	51.54	9.43	732	2009521	836	2340	2403	63.4	2701
TR3_5	68	d__Bacteria;p__Actinobacteriota;c__Rubrobacteria;o__Rubrobacterales;f__Rubrobacteraceae;g__SIRX01;s__	0-0.8282	0	0	0.8282	0	0	0.0103	0	0	0	0.003	0.0058	0.0031	0	0	0	0.0094	0	0	99.12	5.26	732	3663492	277	19188	13225	63.4	3926
TR3_6	42	d__Bacteria;p__Actinobacteriota;c__Actinomycetia;o__Euzebyales;f__;g__;s__	0-0.3967	0	0	0.3967	0.1124	0.0186	0.0201	0	0	0	0	0	0	0	0	0	0	0	0	93.35	3.42	901	3105462	278	17551	11170	70.4	3365
TR3_7	118	d__Bacteria;p__Bacteroidota;c__Bacteroidia;o__Chitinophagales;f__Chitinophagaceae;g__Palsa-955;s__	0-0.3726	0	0	0.3726	0	0	0	0	0	0	0	0	0	0	0	0	0	0	0	90.23	2.71	364	4017721	670	7225	5996	39.9	4198
TR3_8	72	d__Bacteria;p__Actinobacteriota;c__Rubrobacteria;o__Rubrobacterales;f__Rubrobacteraceae;g__SIRX01;s__	0-0.2862	0.0116	0.0721	0.2862	0.2377	0	0.014	0	0	0	0	0	0	0	0	0	0	0	0	84.5	1.75	732	3010666	338	12405	8907	61.3	3422
TR3_9	140	d__Bacteria;p__Chloroflexota;c__Ellin6529;o__QHBO01;f__QHBO01;g__;s__	0-0.3552	0	0	0.3552	0	0	0	0	0	0	0	0	0	0	0	0	0	0	0	91.67	4.73	924	2454673	223	18768	11007	69	2655
NH1_1	174	d__Bacteria;p__Gemmatimonadota;c__Gemmatimonadetes;o__SG8-23;f__SKRI01;g__;s__	0-0.4756	0	0	0	0.4756	0	0	0	0	0	0	0	0	0	0	0	0	0	0	98.9	2.2	2993	2743266	166	25066	16525	66.9	2669
NH1_12	188	d__Bacteria;p__Myxococcota;c__UBA796;o__UBA796;f__GCA-2862545;g__;s__	0-0.2774	0.0061	0	0	0.2774	0	0	0	0	0	0	0	0	0	0	0	0	0	0	73.92	4.2	83	5363933	1222	5130	4389	70.3	5645
NH1_13	204	d__Bacteria;p__Proteobacteria;c__Alphaproteobacteria;o__Sphingomonadales;f__Sphingomonadaceae;g__Allosphingosinicella;s__	0-0.6877	0.0127	0.0082	0	0.6877	0.1775	0.0931	0	0	0	0	0	0	0	0	0	0	0	0	95.87	1.93	564	2265832	184	21828	12314	65	2414
NH1_14	202	d__Bacteria;p__Proteobacteria;c__Alphaproteobacteria;o__Sphingomonadales;f__Sphingomonadaceae;g__Sphingomonas_A;s__	0-0.5754	0.0183	0.0081	0	0.5754	0.0577	0.155	0	0	0	0	0	0	0	0	0	0	0	0	94.25	4.65	564	2121297	245	13460	8658	64.1	2346
NH1_17	53	d__Bacteria;p__Actinobacteriota;c__Actinomycetia;o__Mycobacteriales;f__Pseudonocardiaceae;g__;s__	0-1.3975	0	0	1.3975	0.7077	0.1794	0.0591	0	0	0	0	0	0	0	0	0	0	0	0	83.15	7.57	35	3920155	933	4979	4201	70.9	4893
NH1_18	196	d__Bacteria;p__Proteobacteria;c__Alphaproteobacteria;o__Rhizobiales;f__Rhizobiaceae;g__Mesorhizobium_A;s__	0-0.3387	0.0303	0.0062	0	0.3387	0.007	0	0	0	0	0	0	0	0	0	0	0	0	0	86.18	6.77	238	4489997	1024	5497	4384	63.3	5307
NH1_2	190	d__Bacteria;p__Planctomycetota;c__Phycisphaerae;o__UBA1161;f__;g__;s__	0-0.4353	0.0444	0.0231	0	0.4353	0.0087	0	0	0	0	0	0	0	0	0	0	0	0	0	94.83	0.57	2921	4170858	548	13806	7611	64.8	4086
NH1_20	149	d__Bacteria;p__Chloroflexota;c__Chloroflexia;o__Thermomicrobiales;f__UBA6265;g__;s__	0-0.1863	0.0088	0.0042	0.0108	0.1863	0.1028	0.0721	0	0	0	0	0	0	0	0	0	0	0	0	92.59	4.72	924	3783541	929	4745	4072	62.7	4178
NH1_22	130	d__Bacteria;p__Bacteroidota;c__Bacteroidia;o__Flavobacteriales;f__Flavobacteriaceae;g__Gillisia;s__	0-0.2351	0.0585	0.0403	0.0067	0.2351	0	0.071	0	0	0	0	0	0	0	0	0	0	0	0	78.06	3.94	33	2771919	814	3839	3405	38.2	3160
NH1_23	132	d__Bacteria;p__Bacteroidota;c__Bacteroidia;o__Flavobacteriales;f__Flavobacteriaceae;g__Gillisia;s__	0-1.9985	0.0979	0.0172	0	1.9985	0	0	0	0	0	0	0	0	0	0	0	0	0	0	87.78	9.5	33	3553733	655	6949	5425	38.2	3633
NH1_26	203	d__Bacteria;p__Proteobacteria;c__Alphaproteobacteria;o__Sphingomonadales;f__Sphingomonadaceae;g__Sphingorhabdus_A;s__	0-0.2028	0	0	0	0.2028	0	0	0	0	0	0	0	0	0	0	0	0	0	0	56.26	1.63	26	1489262	572	2633	2603	58.6	1886
NH1_28	125	d__Bacteria;p__Bacteroidota;c__Bacteroidia;o__Cytophagales;f__Cyclobacteriaceae;g__;s__	0-0.2295	0.0189	0.0075	0	0.2295	0.0045	0.018	0	0	0	0	0	0	0	0	0	0	0	0	57.4	5.93	47	3532500	1354	2662	2608	33.7	4355
NH1_3	213	d__Bacteria;p__Proteobacteria;c__Gammaproteobacteria;o__Xanthomonadales;f__Xanthomonadaceae;g__Lysobacter;s__	0-12.8891	0	0	0	12.8891	8.0532	0	0	0	0	0	0	0	0	0	0	0	0	0	99.41	2.63	55	3789102	65	151567	58293	65.4	3203
NH1_30	206	d__Bacteria;p__Proteobacteria;c__Gammaproteobacteria;o__Burkholderiales;f__Nitrosomonadaceae;g__Nitrosospira;s__	0-0.2184	0	0	0	0.2184	0	0	0	0	0	0	0	0	0	0	0	0	0	0	51.68	0.16	235	1584678	519	3217	3053	54.8	1876
NH1_4	127	d__Bacteria;p__Bacteroidota;c__Bacteroidia;o__Cytophagales;f__Hymenobacteraceae;g__;s__	0-0.3386	0.0244	0.0316	0	0.3386	0.0109	0.0216	0	0	0	0	0	0	0	0	0	0	0	0	93.25	2.28	47	5798119	687	11108	8439	53.2	5276
NH1_5	184	d__Bacteria;p__Myxococcota;c__Polyangia;o__Haliangiales;f__Haliangiaceae;g__;s__	0-0.3228	0.0054	0.0045	0	0.3228	0	0	0	0	0	0	0	0	0	0	0	0	0	0	84.85	4.27	83	6164929	784	10667	7863	61.9	5907
NH1_6	191	d__Bacteria;p__Planctomycetota;c__Phycisphaerae;o__UBA1161;f__UBA1161;g__;s__	0-0.5544	0.0057	0.0068	0	0.5544	0.0159	0.0108	0	0	0	0	0	0	0	0	0	0	0	0	96.06	1.81	2921	4805477	492	13610	9767	64.1	4600
NH1_8	219	d__Bacteria;p__Sumerlaeota;c__Sumerlaeia;o__Sumerlaeales;f__Sumerlaeaceae;g__;s__	0-0.354	0.0823	0.031	0	0.354	0.0266	0.0134	0	0	0	0	0	0	0	0	0	0	0	0	83.39	6.49	2258	3674981	679	6915	5412	55.1	3575
NH1_9	183	d__Bacteria;p__Gemmatimonadota;c__Gemmatimonadetes;o__SG8-23;f__RSA9;g__;s__	0-0.5291	0.0049	0.0062	0	0.5291	0	0	0	0	0	0	0	0	0	0	0	0	0	0	87.91	2.2	2993	3417019	216	23750	15819	66.9	3183
NH2_1	117	d__Bacteria;p__Bacteroidota;c__Bacteroidia;o__Chitinophagales;f__Chitinophagaceae;g__Flaviaesturariibacter;s__	0-0.2987	0	0	0.007	0	0.2987	0.2207	0	0	0	0	0	0	0	0	0	0	0	0	96.19	6.52	364	4370555	947	6610	4615	38.6	4721
NH2_10	218	d__Bacteria;p__Sumerlaeota;c__Sumerlaeia;o__Sumerlaeales;f__Sumerlaeaceae;g__;s__	0-0.4639	0.0034	0.0042	0	0.0228	0.4639	0.091	0	0	0	0	0	0	0	0	0	0	0	0	89.01	5.49	2993	3542940	432	10410	8201	53.3	3293
NH2_11	47	d__Bacteria;p__Actinobacteriota;c__Actinomycetia;o__Mycobacteriales;f__Geodermatophilaceae;g__;s__	0-0.3539	0	0	0.0294	0.0246	0.3539	0.1378	0	0	0	0	0	0	0	0	0	0	0	0	93.1	6.49	5449	2983418	287	17023	10395	66.8	3188
NH2_13	115	d__Bacteria;p__Bacteroidota;c__Bacteroidia;o__AKYH767;f__;g__;s__	0-0.4181	0	0	0	0	0.4181	0	0	0	0	0	0	0	0	0	0	0	0	0	93.52	3.27	350	3284670	194	26212	16931	33.9	2857
NH2_14	217	d__Bacteria;p__Sumerlaeota;c__Sumerlaeia;o__Sumerlaeales;f__Sumerlaeaceae;g__;s__	0-0.2633	0	0	0	0	0.2633	0	0	0	0	0	0	0	0	0	0	0	0	0	72.37	1.83	2258	4653993	1395	3642	3336	60.4	4349
NH2_15	209	d__Bacteria;p__Proteobacteria;c__Gammaproteobacteria;o__Xanthomonadales;f__Xanthomonadaceae;g__;s__	0-0.2837	0	0	0.0177	0	0.2837	0.0638	0	0	0	0	0	0	0	0	0	0	0	0	74.05	2.56	55	1653211	506	3493	3267	67.7	1923
NH2_16	214	d__Bacteria;p__Proteobacteria;c__Gammaproteobacteria;o__Xanthomonadales;f__Xanthomonadaceae;g__Lysobacter;s__	0-0.5616	0.0045	0	0	0.007	0.5616	0.0521	0	0	0	0	0	0	0	0	0	0	0	0	92.94	4.43	55	3146362	346	13028	9093	67.5	2987
NH2_17	192	d__Bacteria;p__Planctomycetota;c__Phycisphaerae;o__UBA1161;f__UBA1161;g__;s__	0-0.5896	0	0	0	0.0282	0.5896	0.0986	0	0	0	0	0	0	0	0	0	0	0	0	80.29	2.27	2921	4007280	309	19958	12968	63.7	3783
NH2_2	205	d__Bacteria;p__Proteobacteria;c__Gammaproteobacteria;o__Burkholderiales;f__Burkholderiaceae;g__Herminiimonas;s__	0-0.4067	0	0	0	0.0158	0.4067	0	0	0	0	0	0	0	0	0	0	0	0	0	97.44	5.63	107	4066377	522	14419	7789	56.3	4145
NH2_20	198	d__Bacteria;p__Proteobacteria;c__Alphaproteobacteria;o__Rhodobacterales;f__Rhodobacteraceae;g__Amaricoccus;s__	0-0.3299	0	0	0.0069	0.0968	0.3299	0.0673	0	0	0	0	0	0	0	0	0	0	0	0	63.14	3.6	468	3248502	962	3703	3376	68.9	3830
NH2_24	26	d__Bacteria;p__Acidobacteriota;c__Vicinamibacteria;o__Vicinamibacterales;f__2-12-FULL-66-21;g__;s__	0-0.2229	0	0.0059	0.0244	0.0711	0.2229	0.0725	0	0	0	0	0	0	0	0	0	0	0	0	56.97	4.66	5449	4470508	1771	2541	2524	66.2	5459
NH2_3	133	d__Bacteria;p__Bdellovibrionota;c__Oligoflexia;o__Silvanigrellales;f__Silvanigrellaceae;g__;s__	0-0.4732	0	0	0	0.0029	0.4732	0	0	0	0	0	0	0	0	0	0	0	0	0	90.17	1.68	2258	3054341	165	40330	18511	42.9	3019
NH2_35	18	d__Bacteria;p__Acidobacteriota;c__Blastocatellia;o__Pyrinomonadales;f__Pyrinomonadaceae;g__GCA-002050365;s__	0-0.2455	0	0	0	0.0049	0.2455	0.0144	0	0	0	0	0	0	0	0	0	0	0	0	51.1	6.9	5449	1707371	619	2864	2758	44	2232
NH2_4	137	d__Bacteria;p__Chloroflexota;c__Ellin6529;o__CSP1-4;f__CSP1-4;g__Palsa-1032;s__	0-0.5961	0	0	0.012	0.1048	0.5961	0.073	0	0	0	0	0	0	0	0	0	0	0	0	93.06	5.71	924	2806938	581	6062	4831	68.8	3233
NH2_42	37	d__Bacteria;p__Actinobacteriota;c__Actinomycetia;o__Propionibacteriales;f__;g__;s__	0-0.215	0	0.0037	0.1342	0.1908	0.215	0.0768	0	0	0	0	0	0	0	0	0	0	0	0	56.03	8.36	488	2555763	819	3521	3120	69.4	3262
NH2_44	194	d__Bacteria;p__Planctomycetota;c__Phycisphaerae;o__UBA1161;f__UBA1161;g__;s__	0-0.2617	0	0	0	0	0.2617	0.0384	0	0	0	0	0	0	0	0	0	0	0	0	58.64	5.66	2921	4497809	1430	3470	3145	67.9	4784
NH2_5	134	d__Bacteria;p__Bdellovibrionota;c__Bacteriovoracia;o__Bacteriovoracales;f__Bacteriovoracaceae;g__UBA4096;s__	0-0.2708	0	0	0	0	0.2708	0	0	0	0	0	0	0	0	0	0	0	0	0	78.87	0.05	2258	2864899	663	4956	4321	45	3465
NH2_7	216	d__Bacteria;p__Sumerlaeota;c__Sumerlaeia;o__Sumerlaeales;f__Sumerlaeaceae;g__;s__	0-0.2905	0	0	0	0	0.2905	0.0152	0	0	0	0	0	0	0	0	0	0	0	0	90.81	2.15	2921	3500260	612	6781	5719	58.4	3393
NH2_8	103	d__Bacteria;p__Actinobacteriota;c__Thermoleophilia;o__Solirubrobacterales;f__Thermoleophilaceae;g__;s__	0-1.3883	0	0	0.0054	0.0334	1.3883	0.3101	0	0	0	0	0	0	0	0	0	0	0	0	93.82	1.98	732	2566929	511	6187	5023	72	3083
NH2_9	89	d__Bacteria;p__Actinobacteriota;c__Thermoleophilia;o__Solirubrobacterales;f__Solirubrobacteraceae;g__;s__	0-0.7584	0.0179	0	0.0888	0.019	0.7584	0.0154	0.0426	0	0	0	0	0	0	0	0	0	0	0	84.33	2.42	732	2877086	646	5426	4453	70.5	3608
NH3_1	178	d__Bacteria;p__Gemmatimonadota;c__Gemmatimonadetes;o__SG8-23;f__SKRI01;g__;s__	0-1.2061	0	0	0	0	0	1.2061	0	0	0	0	0	0	0	0	0	0	0	0	97.8	6.04	2993	3787708	246	25480	15397	66.7	3677
NH3_10	40	d__Bacteria;p__Actinobacteriota;c__Actinomycetia;o__Actinomycetales;f__Dermatophilaceae;g__Ornithinicoccus;s__	0-0.4079	0.0371	0.0563	0	0.1097	0.0605	0.4079	0	0	0	0	0	0	0	0	0	0	0	0	92.99	1.62	488	3290173	452	12265	7279	71.1	3574
NH3_12	104	d__Bacteria;p__Actinobacteriota;c__Thermoleophilia;o__Solirubrobacterales;f__Thermoleophilaceae;g__;s__	0-0.8943	0	0	0.1896	0.0136	0.1912	0.8943	0	0	0	0	0	0	0	0	0	0	0	0	88.94	6.58	732	2348943	479	6112	4903	71.6	2850
NH3_14	161	d__Bacteria;p__Deinococcota;c__Deinococci;o__Deinococcales;f__Trueperaceae;g__;s__	0-0.2838	0	0	0	0.0062	0.0861	0.2838	0	0	0	0	0	0	0	0	0	0	0	0	86.86	2.84	169	3840903	937	5017	4099	62	4469
NH3_15	150	d__Bacteria;p__Chloroflexota;c__Chloroflexia;o__Thermomicrobiales;f__UBA6265;g__;s__	0-0.5401	0.0656	0.0291	0	0.0882	0.1907	0.5401	0	0	0	0	0	0	0	0	0	0	0	0	90.5	6.03	924	3464183	861	4946	4023	62.5	3977
NH3_17	41	d__Bacteria;p__Actinobacteriota;c__Actinomycetia;o__Euzebyales;f__;g__;s__	0-0.2132	0	0.0179	0.1133	0.0347	0.1424	0.2132	0	0	0	0	0	0	0	0	0	0	0	0	79.03	0	901	2653011	720	4169	3684	72.7	3163
NH3_18	126	d__Bacteria;p__Bacteroidota;c__Bacteroidia;o__Cytophagales;f__Cyclobacteriaceae;g__Rhodonellum;s__	0-0.2245	0.0382	0.0101	0	0.1018	0.0427	0.2245	0	0	0	0	0	0	0	0	0	0	0	0	80.15	2.33	28	3727703	1131	3714	3295	41.5	4139
NH3_2	160	d__Bacteria;p__Deinococcota;c__Deinococci;o__Deinococcales;f__;g__;s__	0-2.6732	0.0043	0.0049	0	0.0328	0.0933	2.6732	0	0	0	0	0	0	0	0	0	0	0.0013	0	95.76	2.12	169	3581960	366	13884	9786	65.9	3665
NH3_23	145	d__Bacteria;p__Chloroflexota;c__Chloroflexia;o__Thermomicrobiales;f__CFX8;g__;s__	0-0.1847	0.0148	0.0146	0	0.0783	0.0863	0.1847	0	0	0	0	0	0	0	0	0	0	0	0	76.71	5.31	924	3642824	1314	2907	2772	59.7	4543
NH3_25	36	d__Bacteria;p__Actinobacteriota;c__Acidimicrobiia;o__Acidimicrobiales;f__UBA8139;g__;s__	0-0.2681	0	0	0	0	0.0091	0.2681	0	0	0	0	0	0	0	0	0	0	0	0	71.74	2.99	901	2654367	677	4571	3920	70.7	3130
NH3_27	163	d__Bacteria;p__Deinococcota;c__Deinococci;o__Deinococcales;f__Trueperaceae;g__Truepera;s__	0-0.2399	0	0	0	0.0316	0.0417	0.2399	0	0	0	0	0	0	0	0	0	0	0	0	61.4	3.6	169	2216774	865	2622	2562	62.2	2636
NH3_3	35	d__Bacteria;p__Actinobacteriota;c__Acidimicrobiia;o__Acidimicrobiales;f__UBA8139;g__;s__	0-1.4852	0	0	0	0	0.0048	1.4852	0	0	0	0	0	0	0	0	0	0	0	0	97.44	2.14	901	3429604	175	32806	19597	71.2	3647
NH3_33	33	d__Bacteria;p__Actinobacteriota;c__Acidimicrobiia;o__Acidimicrobiales;f__Ilumatobacteraceae;g__Desertimonas;s__	0-0.1824	0	0	0.0083	0.0112	0.0297	0.1824	0	0	0	0	0	0	0	0	0	0	0	0	50.16	5.65	901	2016379	887	2256	2273	66.8	2561
NH3_4	109	d__Bacteria;p__Actinobacteriota;c__;o__;f__;g__;s__	0-0.4081	0	0	0	0	0.0054	0.4081	0	0	0	0	0	0	0	0	0	0	0	0	96.58	0	901	2926241	145	31082	20180	61.4	3096
NH3_5	71	d__Bacteria;p__Actinobacteriota;c__Rubrobacteria;o__Rubrobacterales;f__Rubrobacteraceae;g__Rubrobacter_A;s__	0-0.4479	0.0097	0.0068	0	0.0074	0	0.4479	0	0	0	0	0	0	0	0	0	0	0	0	96.93	1	732	3164891	397	12158	7972	67	3492
NH3_57	108	d__Bacteria;p__Actinobacteriota;c__Thermoleophilia;o__Solirubrobacterales;f__Thermoleophilaceae;g__;s__	0-0.5339	0	0	0	0	0.0228	0.5339	0	0	0	0	0	0	0	0	0	0	0	0	55.42	8.62	5449	1565571	240	9151	6523	70	1851
NH3_6	77	d__Bacteria;p__Actinobacteriota;c__Rubrobacteria;o__Rubrobacterales;f__Rubrobacteraceae;g__;s__	0-2.0854	0	0	0	0.0389	0.013	2.0854	0	0	0	0	0	0	0	0	0	0	0	0	96.64	4.3	732	3272734	240	19924	13636	62.2	3562
NH3_7	162	d__Bacteria;p__Deinococcota;c__Deinococci;o__Deinococcales;f__Trueperaceae;g__Truepera;s__	0-0.6052	0.0036	0	0	0	0	0.6052	0	0	0	0	0	0	0	0	0	0	0	0	91.31	7.77	169	3438938	580	7399	5929	61.1	3646
NH3_9	43	d__Bacteria;p__Actinobacteriota;c__Actinomycetia;o__Euzebyales;f__;g__;s__	0-0.5192	0	0	0.0179	0.0372	0.2608	0.5192	0	0	0	0	0	0	0	0	0	0	0	0	99.15	4.84	901	3562207	376	18135	9473	69.9	3838
MP1_1	55	d__Bacteria;p__Actinobacteriota;c__Actinomycetia;o__Mycobacteriales;f__Pseudonocardiaceae;g__GCA-003244245;s__GCA-003244245 sp003244055	0-4.7554	0	0	0	0	0	0	4.7554	0.1444	0.062	0	0	0	0	0	0	0	0	0	94.66	3.61	35	5113351	320	29143	15979	67.3	5579
MP1_10	228	d__Bacteria;p__Verrucomicrobiota;c__Verrucomicrobiae;o__Chthoniobacterales;f__UBA10450;g__Palsa-1392;s__	0-2.056	0	0	0	0	0	0	2.056	0.0401	0.0581	0	0	0	0	0	0	0	0	0	97.22	7.47	88	3981752	385	21411	10342	60.8	4229
MP1_11	147	d__Bacteria;p__Chloroflexota;c__Chloroflexia;o__Thermomicrobiales;f__UBA6265;g__;s__	0-0.3024	0	0	0	0	0	0	0.3024	0.0422	0	0	0	0	0	0	0	0	0	0	82.92	1.73	924	4006697	901	5111	4446	60	4305
MP1_12	212	d__Bacteria;p__Proteobacteria;c__Gammaproteobacteria;o__Xanthomonadales;f__Xanthomonadaceae;g__WF-2;s__	0-1.0689	0	0	0	0	0	0	1.0689	0	0	0	0	0	0	0	0	0	0	0	96.39	2.26	55	2892639	108	108124	26783	63.2	2758
MP1_14	17	d__Bacteria;p__Acidobacteriota;c__Blastocatellia;o__Pyrinomonadales;f__Pyrinomonadaceae;g__GCA-002050365;s__	0-0.4404	0	0	0	0	0	0	0.4404	0	0	0	0	0	0	0	0	0	0	0	88.89	7.22	2258	4200370	429	17137	9791	47.9	4071
MP1_15	101	d__Bacteria;p__Actinobacteriota;c__Thermoleophilia;o__Solirubrobacterales;f__Solirubrobacteraceae;g__SEOHO-28;s__	0-0.8836	0	0	0.0194	0	0.0057	0.0081	0.8836	0	0	0	0	0	0	0	0	0	0.0025	0.0027	79.74	3.3	732	2955551	759	4644	3894	72.3	3739
MP1_16	143	d__Bacteria;p__Chloroflexota;c__Chloroflexia;o__54-19;f__;g__;s__	0-0.3017	0	0	0	0	0	0	0.3017	0.0582	0	0	0	0	0	0	0	0	0	0	73.98	1.83	924	3286718	895	4038	3672	57.5	3206
MP1_17	57	d__Bacteria;p__Actinobacteriota;c__Actinomycetia;o__Mycobacteriales;f__QHCA01;g__;s__	0-0.6048	0	0	0	0	0	0	0.6048	0.0338	0.0155	0	0	0	0	0	0	0	0	0	92.1	2.5	455	3790687	348	15744	10892	70	3955
MP1_18	129	d__Bacteria;p__Bacteroidota;c__Bacteroidia;o__Cytophagales;f__Spirosomaceae;g__Spirosoma;s__	0-0.273	0	0	0	0	0	0	0.273	0	0	0	0	0	0	0	0	0	0	0	74.07	1.34	47	4551609	1340	3672	3396	50.8	5239
MP1_2	60	d__Bacteria;p__Actinobacteriota;c__Actinomycetia;o__Mycobacteriales;f__QHCE01;g__QHCE01;s__QHCE01 sp003243955	0-0.6279	0	0	0	0	0	0	0.6279	0.1519	0	0	0	0	0	0	0	0	0	0	94.14	0.53	455	2469444	110	28841	22449	59.6	2705
MP1_20	78	d__Bacteria;p__Actinobacteriota;c__Thermoleophilia;o__Gaiellales;f__F1-60-MAGs149;g__;s__	0-0.4102	0	0	0	0	0	0	0.4102	0	0	0	0	0	0	0	0	0	0	0	84.57	2.3	732	2995623	643	5675	4658	72	3324
MP1_21	211	d__Bacteria;p__Proteobacteria;c__Gammaproteobacteria;o__Xanthomonadales;f__Xanthomonadaceae;g__Luteimonas;s__	0-0.3872	0	0	0	0	0	0	0.3872	0	0	0	0	0	0	0	0	0	0	0	90.58	7.56	55	3055953	370	11801	8259	65.1	2856
MP1_22	119	d__Bacteria;p__Bacteroidota;c__Bacteroidia;o__Chitinophagales;f__Chitinophagaceae;g__Palsa-955;s__	0-0.7206	0	0	0	0	0	0	0.7206	0	0	0	0	0	0	0	0	0	0	0	87.15	5.13	364	5082553	869	7858	5848	38.2	5267
MP1_23	91	d__Bacteria;p__Actinobacteriota;c__Thermoleophilia;o__Solirubrobacterales;f__Solirubrobacteraceae;g__;s__	0-0.4853	0	0	0.0282	0	0.0365	0	0.4853	0	0	0	0	0	0	0	0	0	0	0	81.25	3.42	732	2612493	534	6411	4892	70.5	3193
MP1_24	81	d__Bacteria;p__Actinobacteriota;c__Thermoleophilia;o__Gaiellales;f__Gaiellaceae;g__;s__	0-0.3511	0	0	0	0	0	0	0.3511	0.0143	0	0	0	0	0	0	0	0	0	0	85.6	6.03	732	2737716	520	6763	5264	70	3247
MP1_25	185	d__Bacteria;p__Myxococcota;c__Polyangia;o__Haliangiales;f__Haliangiaceae;g__;s__	0-0.2707	0	0	0	0	0	0	0.2707	0	0	0	0	0	0	0	0	0	0	0	75.61	5.75	83	7307843	1980	4296	3690	65.7	8069
MP1_26	19	d__Bacteria;p__Acidobacteriota;c__Blastocatellia;o__Pyrinomonadales;f__Pyrinomonadaceae;g__OLB17;s__	0-0.2512	0	0	0	0	0	0	0.2512	0	0	0	0	0	0	0	0	0	0	0	68.29	1.81	2258	2190188	686	3434	3192	53.9	2604
MP1_27	116	d__Bacteria;p__Bacteroidota;c__Bacteroidia;o__Chitinophagales;f__Chitinophagaceae;g__UBA7600;s__	0-0.3152	0	0	0	0	0	0	0.3152	0	0	0	0	0	0	0	0	0	0	0	72.87	6.6	364	3035027	745	4697	4073	39	3267
MP1_28	39	d__Bacteria;p__Actinobacteriota;c__Actinomycetia;o__Actinomycetales;f__Dermatophilaceae;g__Terracoccus;s__	0-0.3234	0	0	0	0	0	0	0.3234	0	0	0	0	0	0	0	0	0	0	0	73.43	3.45	5449	3054207	615	6047	4966	69.5	3311
MP1_29	10	d__Bacteria;p__Acidobacteriota;c__Acidobacteriae;o__Acidobacteriales;f__Acidobacteriaceae;g__Edaphobacter;s__	0-0.2321	0	0	0	0	0	0	0.2321	0.0735	0.019	0	0	0	0	0	0	0	0	0	67.83	2.25	2258	2643797	935	2918	2827	57.8	3154
MP1_3	38	d__Bacteria;p__Actinobacteriota;c__Actinomycetia;o__Actinomycetales;f__Dermatophilaceae;g__Lapillicoccus;s__	0-1.1695	0	0	0	0	0	0	1.1695	0	0.0036	0	0	0	0	0	0	0	0	0	97.12	0.37	488	3970718	201	37326	19754	69	3980
MP1_30	93	d__Bacteria;p__Actinobacteriota;c__Thermoleophilia;o__Solirubrobacterales;f__Solirubrobacteraceae;g__;s__	0-0.5174	0	0	0	0	0	0	0.5174	0.0793	0	0	0	0	0	0	0	0	0	0	65.8	2.56	732	1414301	321	5240	4405	72.4	1821
MP1_32	49	d__Bacteria;p__Actinobacteriota;c__Actinomycetia;o__Mycobacteriales;f__Jatrophihabitantaceae;g__Jatrophihabitans;s__	0-0.4201	0	0	0	0	0	0	0.4201	0	0	0	0	0	0	0	0	0	0	0	68.06	0.78	274	2385973	239	13993	9983	69	2657
MP1_33	225	d__Bacteria;p__Verrucomicrobiota;c__Verrucomicrobiae;o__Chthoniobacterales;f__UBA10450;g__;s__	0-0.2982	0	0	0	0	0	0	0.2982	0.0121	0.0055	0	0	0	0	0	0	0	0	0	52.56	5.98	88	1228458	338	4242	3634	59.4	1362
MP1_4	15	d__Bacteria;p__Acidobacteriota;c__Blastocatellia;o__Pyrinomonadales;f__Pyrinomonadaceae;g__;s__	0-0.4292	0	0	0	0	0	0	0.4292	0	0	0	0	0	0	0	0	0	0	0.0019	96.1	4.7	2258	4151335	323	19456	12852	54.9	3944
MP1_43	230	d__Bacteria;p__Verrucomicrobiota;c__Verrucomicrobiae;o__Chthoniobacterales;f__UBA10450;g__Palsa-1392;s__	0-0.2869	0	0	0	0	0	0	0.2869	0	0	0	0	0	0	0	0	0	0	0	62.07	9.48	5449	2593382	795	3709	3262	59.6	3220
MP1_5	54	d__Bacteria;p__Actinobacteriota;c__Actinomycetia;o__Mycobacteriales;f__Pseudonocardiaceae;g__GCA-003244245;s__	0-0.673	0	0	0	0	0	0	0.673	0.093	0.0286	0	0	0	0	0	0	0	0	0	88.37	5.32	35	4940108	688	10562	7180	67.3	5810
MP1_50	94	d__Bacteria;p__Actinobacteriota;c__Thermoleophilia;o__Solirubrobacterales;f__Solirubrobacteraceae;g__;s__	0-0.3119	0	0	0	0	0	0	0.3119	0.0266	0	0	0	0	0	0	0	0	0	0	55.69	9.48	5449	1945769	746	2606	2608	72.8	2715
MP1_52	65	d__Bacteria;p__Actinobacteriota;c__Actinomycetia;o__Propionibacteriales;f__Nocardioidaceae;g__Nocardioides;s__	0-0.296	0	0	0	0	0	0	0.296	0.0068	0	0	0	0	0	0	0	0	0	0	50.86	7.76	5449	3516760	1126	3425	3123	71.1	4139
MP1_6	189	d__Bacteria;p__Patescibacteria;c__Saccharimonadia;o__Saccharimonadales;f__UBA4665;g__GCA-2746885;s__	0-0.6157	0	0	0	0	0	0	0.6157	0	0	0	0	0	0	0	0	0	0	0	67.28	0.93	924	837961	30	54783	27932	48.4	949
MP1_7	50	d__Bacteria;p__Actinobacteriota;c__Actinomycetia;o__Mycobacteriales;f__Jatrophihabitantaceae;g__QHCC01;s__	0-1.5893	0	0	0	0	0	0	1.5893	0.1381	0	0	0	0	0	0	0	0	0	0	83.06	0.07	274	2586172	90	44392	28735	69	2588
MP1_8	142	d__Bacteria;p__Chloroflexota;c__Ellin6529;o__QHBO01;f__QHBO01;g__QHBO01;s__QHBO01 sp003243965	0-0.2852	0	0	0	0	0	0	0.2761	0.2852	0.0393	0	0	0	0	0	0	0	0	0	89.81	0	924	1969794	141	21314	13970	69.8	2054
MP1_9	221	d__Bacteria;p__Verrucomicrobiota;c__Verrucomicrobiae;o__Chthoniobacterales;f__UBA10450;g__;s__	0-0.3698	0	0	0	0	0	0	0.3698	0.1535	0.0858	0	0	0	0	0	0	0	0	0	97.3	3.76	88	3703403	129	66241	28708	59.4	3607
MP2_1	11	d__Bacteria;p__Acidobacteriota;c__Acidobacteriae;o__Bryobacterales;f__Bryobacteraceae;g__;s__	0-0.4751	0	0	0	0	0	0	0	0.4751	0.1991	0	0	0	0	0	0	0	0	0	98.26	1.59	2258	6871160	617	17291	11136	58.2	7064
MP2_10	31	d__Bacteria;p__Actinobacteriota;c__Acidimicrobiia;o__Acidimicrobiales;f__QHCF01;g__QHCF01;s__QHCF01 sp003244275	0-1.8881	0	0	0	0	0	0	0	1.8881	0.0132	0	0	0	0	0	0	0	0	0	92.31	2.39	901	2468762	367	8779	6726	68.1	2792
MP2_11	29	d__Bacteria;p__Actinobacteriota;c__Acidimicrobiia;o__Acidimicrobiales;f__AC-14;g__;s__	0-2.4488	0	0	0	0	0	0	0.0318	2.4488	0.0897	0	0	0	0	0	0	0	0	0	98.29	2.23	901	2718438	147	28497	18492	69.9	2947
MP2_12	157	d__Bacteria;p__Chloroflexota;c__UBA6077;o__UBA6077;f__CF-72;g__CF-72;s__	0-0.7115	0	0	0	0	0	0	0	0.7115	0.0923	0	0	0	0	0	0	0	0	0	94.22	5.94	924	8083801	501	29310	16135	64.5	8490
MP2_13	95	d__Bacteria;p__Actinobacteriota;c__Thermoleophilia;o__Solirubrobacterales;f__Solirubrobacteraceae;g__Palsa-465;s__	0-0.4095	0	0	0	0	0	0	0.1613	0.4095	0.1425	0	0	0	0	0	0	0	0	0	83.29	1.14	732	2489705	288	12638	8644	69.9	2659
MP2_14	51	d__Bacteria;p__Actinobacteriota;c__Actinomycetia;o__Mycobacteriales;f__Jatrophihabitantaceae;g__QHCC01;s__QHCC01 sp003243915	0-0.7122	0	0	0	0	0	0	0.1384	0.7122	0.0368	0	0	0	0	0	0	0	0	0	84.66	1.44	274	3231125	228	22165	14171	69.2	3378
MP2_15	100	d__Bacteria;p__Actinobacteriota;c__Thermoleophilia;o__Solirubrobacterales;f__Solirubrobacteraceae;g__QHBW01;s__QHBW01 sp003244205	0-0.455	0	0	0	0	0	0	0.0072	0.455	0.2173	0	0	0	0	0	0	0	0	0	91.67	0.85	732	2727027	237	16688	11506	69.6	2905
MP2_16	144	d__Bacteria;p__Chloroflexota;c__Chloroflexia;o__54-19;f__;g__;s__	0-0.3857	0	0	0	0	0	0	0.0475	0.3857	0.1152	0	0	0	0	0	0	0	0	0	89.44	8.18	924	3639688	688	6390	5290	65.2	3708
MP2_18	99	d__Bacteria;p__Actinobacteriota;c__Thermoleophilia;o__Solirubrobacterales;f__Solirubrobacteraceae;g__QHBW01;s__	0-0.8097	0	0	0	0	0	0	0.0236	0.8097	0.0589	0	0	0	0	0	0	0	0	0	78.06	2.42	732	2528296	477	6968	5300	72.3	2781
MP2_19	62	d__Bacteria;p__Actinobacteriota;c__Actinomycetia;o__Propionibacteriales;f__Nocardioidaceae;g__;s__	0-0.3136	0	0	0	0	0	0	0.041	0.3136	0.0198	0	0	0	0	0	0	0	0	0	86.44	7.6	5449	3284531	1024	3505	3207	65.5	4168
MP2_2	172	d__Bacteria;p__Eremiobacterota;c__Eremiobacteria;o__UBP12;f__UBA5184;g__Palsa-1515;s__	0-0.6293	0	0	0	0	0	0	0	0.6293	0.2505	0	0	0	0	0	0	0	0	0	96.91	1.13	924	3478168	162	36887	21470	64.2	3568
MP2_20	227	d__Bacteria;p__Verrucomicrobiota;c__Verrucomicrobiae;o__Chthoniobacterales;f__UBA10450;g__AV69;s__	0-0.2972	0	0	0	0	0	0	0	0.2972	0.1481	0	0	0	0	0	0	0	0	0	76.18	0.68	88	1865619	317	7154	5885	56.3	2102
MP2_22	153	d__Bacteria;p__Chloroflexota;c__Ktedonobacteria;o__Ktedonobacterales;f__Ktedonobacteraceae;g__;s__	0-0.2844	0	0	0	0	0	0	0.0089	0.2844	0.0271	0	0	0	0	0	0	0	0	0	57.58	2.16	924	3717598	1383	2735	2688	49.8	4612
MP2_23	208	d__Bacteria;p__Proteobacteria;c__Gammaproteobacteria;o__Xanthomonadales;f__Rhodanobacteraceae;g__;s__	0-0.2678	0	0	0	0	0	0	0	0.2678	0.0666	0	0	0	0	0	0	0	0	0	57.99	0.15	55	1296078	480	2784	2700	63.2	1556
MP2_24	52	d__Bacteria;p__Actinobacteriota;c__Actinomycetia;o__Mycobacteriales;f__Nakamurellaceae;g__Nakamurella;s__	0-0.297	0	0	0	0	0	0	0.0417	0.297	0.033	0	0	0	0	0	0	0	0	0	54.45	1.72	5449	2499875	965	2695	2590	66.1	2964
MP2_25	167	d__Bacteria;p__Dormibacterota;c__Dormibacteria;o__UBA8260;f__UBA8260;g__;s__	0-0.2988	0	0	0	0	0	0	0	0.2988	0.0735	0	0	0	0	0	0	0	0	0	51.61	0.93	924	1310041	442	3109	2963	66.4	1676
MP2_28	122	d__Bacteria;p__Bacteroidota;c__Bacteroidia;o__Chitinophagales;f__Chitinophagaceae;g__;s__	0-0.2683	0	0	0	0	0	0	0	0.2683	0.0592	0	0	0	0	0	0	0	0	0	53.48	0.3	364	2172056	829	2683	2620	34	2702
MP2_29	98	d__Bacteria;p__Actinobacteriota;c__Thermoleophilia;o__Solirubrobacterales;f__Solirubrobacteraceae;g__Palsa-465;s__	0-0.4242	0	0	0	0	0	0	0.011	0.3894	0.4242	0	0	0	0	0	0	0	0	0	55.56	7.05	5449	1930814	322	8532	5996	69	2197
MP2_3	165	d__Bacteria;p__Dormibacterota;c__Dormibacteria;o__Dormibacterales;f__Dormibacteraceae;g__Dormibacter;s__	0-1.6005	0	0	0	0	0	0	0	1.6005	1.0821	0	0	0	0	0	0	0	0	0	97.22	0	924	3094134	64	88071	48345	66.3	3285
MP2_30	58	d__Bacteria;p__Actinobacteriota;c__Actinomycetia;o__Mycobacteriales;f__QHCA01;g__;s__	0-0.4294	0	0	0	0	0	0	0.0515	0.4294	0.0065	0	0	0	0	0	0	0	0	0	52.35	7.76	5449	2737533	601	6145	4554	71.1	3202
MP2_4	171	d__Bacteria;p__Eremiobacterota;c__Eremiobacteria;o__Eremiobacterales;f__Eremiobacteraceae;g__Eremiobacter;s__Eremiobacter sp003244105	0-0.527	0	0	0	0	0	0	0	0.527	0.1522	0	0	0	0	0	0	0	0	0	99.07	0	924	2533839	75	61465	33784	62.8	2491
MP2_5	56	d__Bacteria;p__Actinobacteriota;c__Actinomycetia;o__Mycobacteriales;f__Pseudonocardiaceae;g__GCA-003244245;s__GCA-003244245 sp003244245	0-2.0927	0	0	0	0	0	0	0.0316	2.0927	0.2464	0	0	0	0	0	0.0068	0	0	0	93.42	3.49	35	5102352	416	23616	12265	67.3	5671
MP2_6	156	d__Bacteria;p__Chloroflexota;c__UBA5177;o__UBA5177;f__UBA5177;g__;s__	0-0.7827	0	0	0	0	0	0	0.0044	0.7827	0.0076	0	0	0	0	0	0	0	0	0	97.69	0.99	924	4410954	221	31697	19959	61.2	4393
MP2_7	59	d__Bacteria;p__Actinobacteriota;c__Actinomycetia;o__Mycobacteriales;f__QHCD01;g__QHCD01;s__QHCD01 sp003244255	0-1.2336	0	0	0	0	0	0	0.0709	1.2336	0.0303	0	0	0	0	0	0	0	0	0	94.94	1.17	274	3174555	216	24987	14697	70.2	3341
MP2_8	173	d__Bacteria;p__Eremiobacterota;c__Eremiobacteria;o__UBP12;f__UBA5184;g__QHBJ01;s__QHBJ01 sp003243975	0-0.4355	0	0	0	0	0	0	0	0.4355	0.1847	0	0	0	0	0	0	0	0	0	96.76	0	924	1976703	57	66010	34679	60.1	2042
MP3_1	12	d__Bacteria;p__Acidobacteriota;c__Acidobacteriae;o__Bryobacterales;f__Bryobacteraceae;g__;s__	0-0.8122	0	0	0	0	0	0	0	0.1787	0.8122	0	0	0	0	0	0	0	0	0	95.65	1.74	2258	7265343	367	37595	19796	56.6	7454
MP3_10	166	d__Bacteria;p__Dormibacterota;c__Dormibacteria;o__Dormibacterales;f__Dormibacteraceae;g__QHBS01;s__QHBS01 sp003243885	0-0.8785	0	0	0	0	0	0	0	0.8785	0.4455	0	0	0	0	0	0	0	0	0	98.61	3.24	924	5161183	253	30559	20399	68.3	5398
MP3_11	223	d__Bacteria;p__Verrucomicrobiota;c__Verrucomicrobiae;o__Chthoniobacterales;f__UBA10450;g__;s__	0-0.5744	0	0	0	0	0	0	0.0501	0.1726	0.5744	0	0	0	0	0	0	0	0	0	95.54	4.81	88	3392043	127	37842	26709	60.6	3326
MP3_12	152	d__Bacteria;p__Chloroflexota;c__Ktedonobacteria;o__Ktedonobacterales;f__Ktedonobacteraceae;g__;s__	0-0.371	0	0	0	0	0	0	0	0	0.371	0	0	0	0	0	0	0	0	0	89.63	6.14	924	5771043	808	8480	7142	49.4	5837
MP3_13	121	d__Bacteria;p__Bacteroidota;c__Bacteroidia;o__Chitinophagales;f__Chitinophagaceae;g__Parafilimonas;s__	0-0.3358	0	0	0	0	0	0	0	0.0356	0.3358	0	0	0	0	0	0	0	0	0	89.34	1.72	364	3859142	621	8094	6214	35.4	4127
MP3_15	155	d__Bacteria;p__Chloroflexota;c__Ktedonobacteria;o__Ktedonobacterales;f__Ktedonobacteraceae;g__UBA11361;s__	0-0.5424	0	0	0	0	0	0	0	0.0132	0.5424	0	0	0	0.0043	0	0	0	0	0	92.74	9.41	924	6107227	588	13894	10386	52.1	6000
MP3_16	8	d__Bacteria;p__Acidobacteriota;c__Acidobacteriae;o__Acidobacteriales;f__Acidobacteriaceae;g__;s__	0-0.4584	0	0	0	0	0	0	0	0.0287	0.4584	0	0	0	0	0	0	0	0	0	95.97	2.59	2258	3787833	322	24008	11763	62.4	3397
MP3_17	96	d__Bacteria;p__Actinobacteriota;c__Thermoleophilia;o__Solirubrobacterales;f__Solirubrobacteraceae;g__Palsa-465;s__	0-0.5676	0	0	0	0	0	0	0.0761	0.5393	0.5676	0	0	0	0	0	0	0	0	0	78.08	2.56	732	3108424	298	15307	10430	70.5	3353
MP3_18	170	d__Bacteria;p__Dormibacterota;c__Dormibacteria;o__UBA8260;f__UBA8260;g__Palsa-875;s__Palsa-875 sp003244045	0-2.2341	0	0	0	0	0	0	0.0089	0.1304	2.2341	0	0	0	0	0	0	0	0	0	97.07	5.56	924	3274192	164	29679	19964	68.6	3419
MP3_19	186	d__Bacteria;p__Myxococcota;c__Polyangia;o__Polyangiales;f__Polyangiaceae;g__;s__	0-0.2979	0	0	0	0	0	0	0	0.1176	0.2979	0	0	0	0	0	0	0	0	0	73.17	3.76	83	5773611	1402	4800	4118	64.9	6627
MP3_2	220	d__Bacteria;p__Verrucomicrobiota;c__Verrucomicrobiae;o__Chthoniobacterales;f__UBA10450;g__;s__	0-0.5462	0	0	0	0	0	0	0	0.0249	0.5462	0	0	0	0	0	0	0	0	0	98.99	0.68	88	2686832	66	73752	40709	59.6	2635
MP3_20	120	d__Bacteria;p__Bacteroidota;c__Bacteroidia;o__Chitinophagales;f__Chitinophagaceae;g__Palsa-955;s__	0-0.2596	0	0	0	0	0	0	0	0.0225	0.2596	0	0	0	0	0	0	0	0	0	70.34	6.1	364	3011278	1056	2967	2851	36.5	3680
MP3_25	169	d__Bacteria;p__Dormibacterota;c__Dormibacteria;o__UBA8260;f__UBA8260;g__Palsa-875;s__	0-0.4621	0	0	0	0	0	0	0.0079	0.0309	0.4621	0	0	0	0	0	0	0	0	0	68.41	7.41	924	1344210	276	6179	4870	69.7	1555
MP3_26	168	d__Bacteria;p__Dormibacterota;c__Dormibacteria;o__UBA8260;f__UBA8260;g__Palsa-875;s__	0-0.2942	0	0	0	0	0	0	0	0.0413	0.2942	0	0	0	0	0	0	0	0	0	56.2	5.19	924	1835373	516	4043	3556	68.6	2254
MP3_4	32	d__Bacteria;p__Actinobacteriota;c__Acidimicrobiia;o__IMCC26256;f__PALSA-555;g__;s__	0-0.5651	0	0	0	0	0	0	0	0.0395	0.5651	0	0	0	0.0064	0	0	0	0	0	95.73	2.99	901	4775382	505	14195	9456	69.1	5209
MP3_5	154	d__Bacteria;p__Chloroflexota;c__Ktedonobacteria;o__Ktedonobacterales;f__Ktedonobacteraceae;g__CF-113;s__	0-4.1343	0	0	0	0	0	0	0	0	4.1343	0	0	0	0	0	0	0	0	0	98.68	2.97	924	4424965	279	28460	15860	52.3	4219
MP3_6	67	d__Bacteria;p__Actinobacteriota;c__Actinomycetia;o__Streptosporangiales;f__Streptosporangiaceae;g__PALSA-505;s__	0-1.1316	0	0	0	0	0	0	0	0.039	1.1316	0	0	0	0	0	0	0	0	0	93.79	1.07	455	5265757	680	11102	7743	70.1	5840
MP3_7	13	d__Bacteria;p__Acidobacteriota;c__Acidobacteriae;o__Bryobacterales;f__Bryobacteraceae;g__;s__	0-0.5569	0	0	0	0	0	0	0.0053	0.164	0.5569	0	0	0	0	0	0	0	0	0	98.17	2.63	2258	6266435	304	38158	20613	59.1	5910
MP3_8	195	d__Bacteria;p__Proteobacteria;c__Alphaproteobacteria;o__Caulobacterales;f__Caulobacteraceae;g__Palsa-881;s__	0-0.6416	0	0	0	0	0	0	0	0.0536	0.6416	0	0	0	0	0	0	0	0	0	92.66	4.96	26	3034998	490	8241	6193	68.4	3376
MP3_9	9	d__Bacteria;p__Acidobacteriota;c__Acidobacteriae;o__Acidobacteriales;f__Acidobacteriaceae;g__Edaphobacter;s__	0-0.713	0	0	0	0	0	0	0	0.0591	0.713	0	0	0	0	0	0	0	0	0	100	3.26	2258	4112741	67	108074	61384	59.5	3513
TP1_1	86	d__Bacteria;p__Actinobacteriota;c__Thermoleophilia;o__Solirubrobacterales;f__70-9;g__;s__	0-0.4658	0	0	0	0	0	0	0	0	0	0.4658	0	0.0037	0	0	0	0	0	0	97.67	1.87	732	3195655	274	16630	11662	70.7	3356
TP1_2	79	d__Bacteria;p__Actinobacteriota;c__Thermoleophilia;o__Gaiellales;f__Gaiellaceae;g__;s__	0-0.3011	0	0	0	0	0	0	0	0	0	0.3011	0.0522	0.0402	0	0	0	0	0	0	88.39	3.48	732	3082452	633	5900	4869	71.9	3684
TP1_3	2	d__Archaea;p__Thermoproteota;c__Nitrososphaeria;o__Nitrososphaerales;f__Nitrososphaeraceae;g__UBA10452;s__	0-0.1229	0	0	0	0	0	0	0	0	0	0.1229	0.0762	0.0695	0	0	0	0	0	0	73.06	1.46	207	2586556	798	3620	3241	39.3	3486
TP1_4	25	d__Bacteria;p__Acidobacteriota;c__Thermoanaerobaculia;o__UBA5704;f__UBA5704;g__UBA5704;s__	0-0.1633	0	0	0	0	0	0	0	0	0	0.1633	0	0	0	0	0	0	0	0	69.14	4.02	5449	4291595	1292	3667	3321	69	4427
TP1_5	114	d__Bacteria;p__Armatimonadota;c__Fimbriimonadia;o__Fimbriimonadales;f__Fimbriimonadaceae;g__;s__	0-0.1543	0	0	0	0	0	0	0	0	0	0.1543	0.0058	0.0081	0	0	0	0	0	0	58.78	5.56	924	2899495	1027	2953	2823	65.9	3418
TP1_8	107	d__Bacteria;p__Actinobacteriota;c__Thermoleophilia;o__Solirubrobacterales;f__Thermoleophilaceae;g__;s__	0-0.1424	0	0	0	0	0	0	0	0	0	0.1424	0.0065	0.0072	0	0	0	0	0	0	61.39	9.81	732	2779538	1198	2253	2320	71.6	3655
TP1_9	84	d__Bacteria;p__Actinobacteriota;c__Thermoleophilia;o__Gaiellales;f__Gaiellaceae;g__VAXT01;s__	0-0.121	0	0	0	0	0	0	0	0	0	0.121	0.0525	0.0823	0	0	0	0	0	0	50.43	4.51	732	1206462	520	2269	2320	69.9	1565
TP2_4	80	d__Bacteria;p__Actinobacteriota;c__Thermoleophilia;o__Gaiellales;f__Gaiellaceae;g__VAXT01;s__	0-0.2022	0	0	0	0	0	0	0	0	0	0.0168	0.2022	0.0226	0	0	0	0	0	0	63.82	1.29	732	2146441	422	6260	5086	69.7	2514
TP2_5	20	d__Bacteria;p__Acidobacteriota;c__Blastocatellia;o__Pyrinomonadales;f__Pyrinomonadaceae;g__PSRF01;s__	0-0.118	0	0	0	0	0	0	0	0	0	0.0063	0.118	0.0054	0	0	0	0	0	0	57.65	2.04	2258	3566667	1396	2585	2554	54	4126
TP3_1	4	d__Archaea;p__Thermoproteota;c__Nitrososphaeria;o__Nitrososphaerales;f__Nitrososphaeraceae;g__Nitrososphaera;s__	0-0.155	0	0	0	0	0	0	0	0	0	0.0895	0.0963	0.155	0	0	0	0	0	0	85.44	6.39	207	1384606	374	4142	3702	43.9	1789
TP3_2	111	d__Bacteria;p__Actinobacteriota;c__UBA4738;o__UBA4738;f__;g__;s__	0-0.1871	0	0	0	0	0	0	0	0	0	0.0153	0.0073	0.1871	0	0	0	0	0	0	75.86	5.55	5449	2344489	387	8996	6058	70	2646
TP3_3	138	d__Bacteria;p__Chloroflexota;c__Ellin6529;o__P2-11E;f__CF-107;g__;s__	0-0.1475	0	0	0	0	0	0	0	0	0	0.0494	0.13	0.1475	0	0	0	0	0	0	70.43	3.09	924	1703005	327	6918	5207	68.7	1988
TP3_5	70	d__Bacteria;p__Actinobacteriota;c__Rubrobacteria;o__Rubrobacterales;f__Rubrobacteraceae;g__SIRX01;s__	0-0.1456	0	0	0	0	0	0	0	0	0	0.0768	0.0986	0.1456	0	0	0	0	0	0	55.85	4.81	732	1195580	499	2404	2395	66.5	1618
TP3_8	112	d__Bacteria;p__Actinobacteriota;c__UBA4738;o__UBA4738;f__;g__;s__	0-0.121	0	0	0	0	0	0	0	0	0	0.0223	0.0171	0.121	0	0	0	0	0	0	53.13	7.41	901	1124405	422	2611	2664	71.6	1511
TP3_9	5	d__Archaea;p__Thermoproteota;c__Nitrososphaeria;o__Nitrososphaerales;f__Nitrososphaeraceae;g__Nitrososphaera;s__	0-0.098	0	0	0	0	0	0	0	0	0	0.0776	0.0761	0.098	0	0	0	0	0	0	56.15	8.9	207	1111253	498	2208	2231	44.2	1549
SS1_1	207	d__Bacteria;p__Proteobacteria;c__Gammaproteobacteria;o__Burkholderiales;f__Palsa-1005;g__PALSA-1003;s__	0-0.2017	0	0	0	0	0	0	0	0	0	0	0	0	0.2017	0.1012	0.0756	0	0.0249	0.0265	81.07	7.42	235	3407008	950	4038	3586	63.3	3889
SS1_2	164	d__Bacteria;p__Dormibacterota;c__Dormibacteria;o__CF-121;f__CF-121;g__CF-13;s__	0-0.1882	0	0	0	0	0	0	0	0	0	0	0	0	0.1882	0.0619	0	0	0	0	66.4	2.96	924	1840327	555	3680	3315	65.3	2289
SS1_3	97	d__Bacteria;p__Actinobacteriota;c__Thermoleophilia;o__Solirubrobacterales;f__Solirubrobacteraceae;g__Palsa-465;s__	0-0.2967	0	0	0	0	0	0	0	0	0	0	0	0	0.2967	0.0499	0	0	0	0	71.08	5.11	732	5226733	1575	3669	3318	68.5	6246
SS1_4	7	d__Archaea;p__Thermoproteota;c__Nitrososphaeria;o__Nitrososphaerales;f__Nitrososphaeraceae;g__UBA10452;s__UBA10452 sp002501855	0-0.1689	0	0	0	0	0	0	0.0138	0.04	0.0396	0	0	0	0.1689	0.0145	0	0	0	0.0117	51.16	0	207	1070089	484	2223	2210	39.2	1519
SS2_1	226	d__Bacteria;p__Verrucomicrobiota;c__Verrucomicrobiae;o__Chthoniobacterales;f__UBA10450;g__AV40;s__	0-0.1604	0	0	0	0	0	0	0	0	0	0	0	0	0.0416	0.1604	0	0	0	0	75.68	5.43	88	2105499	622	3876	3385	55.5	2514
SS3_1	85	d__Bacteria;p__Actinobacteriota;c__Thermoleophilia;o__Gaiellales;f__Gaiellaceae;g__UBA5186;s__	0-0.9487	0	0	0	0	0	0	0	0	0	0	0	0	0.0171	0.008	0.9487	0.0061	0.0124	0.0057	94.25	3.86	732	3410962	126	46737	27071	68.8	3524
SS3_2	23	d__Bacteria;p__Acidobacteriota;c__Blastocatellia;o__Pyrinomonadales;f__Pyrinomonadaceae;g__UBA11741;s__	0-0.2135	0	0	0	0	0	0	0	0	0	0	0	0	0	0	0.2135	0	0	0	88.84	1.76	2258	5022352	1302	4616	3857	57.6	5109
SS3_4	113	d__Bacteria;p__Actinobacteriota;c__UBA4738;o__UBA4738;f__HRBIN12;g__;s__	0-0.2242	0	0	0	0	0	0	0	0	0	0	0	0	0.0047	0.0047	0.2242	0	0.0448	0.0201	80.96	5.96	901	2665858	697	5102	3824	69.2	3129
AFH1_1	22	d__Bacteria;p__Acidobacteriota;c__Blastocatellia;o__Pyrinomonadales;f__Pyrinomonadaceae;g__UBA11741;s__	0-0.2666	0	0	0	0	0	0	0	0	0	0	0	0	0	0	0	0.2666	0	0	91.67	1.55	2258	4122425	388	15123	10624	53.2	3774
AFH1_10	27	d__Bacteria;p__Acidobacteriota;c__Vicinamibacteria;o__Vicinamibacterales;f__UBA2999;g__;s__	0-0.1116	0	0	0	0	0	0	0	0	0	0	0	0	0	0	0	0.1116	0	0	52.12	7.96	2258	2170337	968	2196	2242	63.6	2693
AFH1_2	24	d__Bacteria;p__Acidobacteriota;c__Thermoanaerobaculia;o__UBA5066;f__Gp7-AA6;g__Gp7-AA6;s__	0-0.4519	0	0	0	0	0	0	0	0	0	0	0	0	0	0	0	0.4519	0	0	92.31	2.95	2258	3014506	531	7584	5677	67.3	3098
AFH1_3	3	d__Archaea;p__Thermoproteota;c__Nitrososphaeria;o__Nitrososphaerales;f__Nitrososphaeraceae;g__TA-21;s__	0-0.1449	0	0	0.0202	0	0	0	0	0	0	0	0	0	0	0	0	0.1449	0	0	69.09	3.88	207	2039617	680	3183	2999	35.4	2920
AFH1_4	6	d__Archaea;p__Thermoproteota;c__Nitrososphaeria;o__Nitrososphaerales;f__Nitrososphaeraceae;g__UBA10452;s__	0-0.167	0	0	0.063	0	0	0	0	0	0	0	0	0	0	0	0	0.167	0	0	81.43	8.17	207	2548018	669	4386	3808	38.4	3430
AFH1_5	159	d__Bacteria;p__Cyanobacteria;c__Cyanobacteriia;o__Elainellales;f__Elainellaceae;g__;s__	0-0.1363	0	0	0	0	0	0	0	0	0	0	0	0	0	0	0	0.1363	0	0	57.3	4.06	89	3272865	1304	2541	2509	50	3685
AFH1_6	182	d__Bacteria;p__Gemmatimonadota;c__Gemmatimonadetes;o__Gemmatimonadales;f__GWC2-71-9;g__;s__	0-0.1319	0	0	0	0	0	0	0	0	0	0	0	0	0	0.0019	0.0071	0.1319	0.0031	0	63.82	2.2	2993	1983925	655	3281	3028	65.7	2386
AFH1_7	83	d__Bacteria;p__Actinobacteriota;c__Thermoleophilia;o__Gaiellales;f__Gaiellaceae;g__VAXT01;s__	0-0.3864	0	0	0	0	0	0	0	0	0	0	0	0	0	0	0.0048	0.3864	0.0045	0	74.05	8.05	732	2076053	540	4390	3844	69.1	2599
AFH1_9	123	d__Bacteria;p__Bacteroidota;c__Bacteroidia;o__Chitinophagales;f__Chitinophagaceae;g__UBA2791;s__	0-0.1219	0	0	0	0	0	0	0	0	0	0	0	0	0	0	0	0.1219	0	0	63.24	2.15	364	3092589	1160	2747	2666	42.9	3514
AFH2_1	1	d__Archaea;p__Thermoproteota;c__Nitrososphaeria;o__Nitrososphaerales;f__Nitrososphaeraceae;g__TA-21;s__	0-0.2168	0	0	0	0	0	0	0	0	0	0	0	0	0	0	0.09	0	0.2168	0.0104	98.54	0.97	207	2292037	166	21353	13807	35.7	2807
AFH2_2	21	d__Bacteria;p__Acidobacteriota;c__Blastocatellia;o__Pyrinomonadales;f__Pyrinomonadaceae;g__UBA11740;s__	0-0.1221	0	0	0	0	0	0	0	0	0	0	0	0	0.01	0.011	0.0117	0	0.1221	0.0103	61.14	5.75	2258	3747343	1286	2982	2913	55.3	4135
AFH2_3	158	d__Bacteria;p__Cyanobacteria;c__Cyanobacteriia;o__Cyanobacteriales;f__Coleofasciculaceae;g__PCC7113;s__	0-0.1159	0	0	0	0	0	0	0	0	0	0	0	0	0	0	0	0	0.1159	0.0031	58.38	1.11	82	4513112	1615	2880	2794	45.9	5251
AFH2_7	128	d__Bacteria;p__Bacteroidota;c__Bacteroidia;o__Cytophagales;f__Hymenobacteraceae;g__Hymenobacter;s__	0-0.1134	0	0	0	0	0	0	0	0	0	0	0	0	0	0	0	0.0054	0.1134	0.0061	50.61	1.93	47	2547443	1037	2468	2456	62.9	2934
AFH3_1	14	d__Bacteria;p__Acidobacteriota;c__Acidobacteriae;o__UBA7541;f__UBA7541;g__UBA7541;s__	0-0.2506	0	0	0	0	0	0	0	0	0	0	0	0	0	0.0064	0.009	0	0.0576	0.2506	95.51	1.8	2258	4344287	132	56101	32911	56.7	3848

## Sheet: Sheet2
Region	MAGS (#)	Completeness (%)	Contamination (%)	Genomes (#)	Genome Size (bp)	Contigs (#)	N50 (Contigs)	Mean contig length (bp)	GC Content (%)	Predicted genes (#)
TR	57	82.8146	4.70053	1308.25	3.03505e+06	532.912	12414.7	7640.16	64.9579	3409.09
NH	58	82.881	3.94638	1298.09	3.34284e+06	636.086	12942.4	8043.45	60.9741	3591.76
MP	78	82.6409	3.42795	1249.88	3.47191e+06	499.641	20657.5	12197.7	62.2474	3727.53
TP	15	67.8127	4.67933	1394.53	2.30788e+06	671.133	4894.4	4030.2	63.1267	2755.47
SS	8	76.18	4.0625	759.625	3.0936e+06	788.875	9242.62	6320.75	60.925	3527.38
AFH	14	72.0864	3.75214	1158.43	2.98318e+06	795.071	9372.5	6591.29	53.0071	3362.43
Total	230	464.416	24.5688	7168.8	1.82345e+07	3923.72	69524.2	44823.5	365.238	20373.6
