# Supplementary material for: Atmospheric chemosynthesis is phylogenetically and geographically widespread and contributes significantly to carbon fixation throughout cold deserts
Source: Research Square preprint supplement (doi:10.21203/rs.3.rs-948000/v1), 2021-10-13
Supplement: Supplementary file 16 [file 55482892cccc90d94b2f1102.xlsx]

## Sheet: Abundances
Annotation	Gene	TR1	TR2	TR3	NH1	NH2	NH3	MP1	MP2	MP3	TP1	TP2	TP3	SS1	SS2	SS3	AFH1	AFH2	AFH3
GAPDH	Glyceraldehyde 3-phosphate dehydrogenase	44.0906	44.5275	34.5269	55.288	50.5136	41.1092	34.3034	31.8631	34.6679	44.3163	43.4943	41.9819	42.6709	42.3106	39.0315	40.0883	38.9757	31.4547
TKT	Transketolase	20.2857	17.8721	28.6438	31.7581	32.1442	29.0158	33.8753	28.7322	31.0704	33.005	31.7793	29.0467	32.4683	34.1649	32.7195	33.3647	32.5259	25.5345
PRK	Phosphoribulokinase	0.0322979	0	4.5455	1.84583	1.69725	0.617917	4.92778	4.92339	2.7156	0.755857	0.546924	0.682818	1.61086	1.41286	1.97461	2.96025	4.81643	3.69898
pgK	Phosphoglycerate kinase	26.8076	28.4417	29.3986	35.7922	35.4402	32.5346	26.9944	23.7999	26.0802	33.5005	33.3274	33.181	31.2501	33.25	31.1826	32.5781	32.6994	24.7977
tpiA	Triosephosphate isomerase	25.908	25.2187	25.5125	33.0119	31.7544	28.1713	28.9612	25.509	26.9808	31.5911	29.8794	31.4688	26.8931	28.3756	27.0198	27.5198	27.341	21.2847
FBA/FDA	Fructose-bisphosphate aldolase class I and II	30.2978	29.9145	30.3724	36.5388	32.8885	33.7952	42.5864	28.8416	30.6663	28.5307	26.168	26.1307	27.3654	25.2831	28.931	28.7232	31.9195	24.319
rbcL1A	Ribulose-bisphosphate carboxylase form IA	1.23115	1.62376	1.29559	0.200784	0.628368	1.19875	0.372845	0.816503	0.871335	1.53083	1.38867	2.76054	0.90635	0.594	0.793837	1.10499	1.66289	1.55131
rbcL1B	Ribulose-bisphosphate carboxylase form IB	0.0188241	0	0.0516085	0	0.0202914	0.00923431	0.15468	0.172456	0.460334	0.0469902	0.0842011	0.113002	0.157485	0.102931	0.208734	0.61024	1.03067	0.769406
rbcL1C	Ribulose-bisphosphate carboxylase form IC	1.31394	1.28328	0.980919	0.497989	0.862784	1.10756	0.234268	0.838304	0.833935	0.248308	0.224687	0.188377	0.607395	0.648829	1.0205	0.57812	1.14056	0.75267
rbcL1D	Ribulose-bisphosphate carboxylase form ID	1.27123	0.992136	1.16174	0.557145	1.01781	1.27433	0.270046	0.506361	0.961827	0.494397	0.417935	0.504903	0.859596	0.592596	0.828213	1.35197	1.86541	1.47252
rbcL1E	Ribulose-bisphosphate carboxylase form IE	17.5319	19.3997	17.2136	4.10779	8.59996	11.5324	9.37594	23.2852	17.5073	2.09667	2.93963	4.36314	2.54093	1.65446	1.63379	1.62797	1.33549	1.20936
rbcL2	Ribulose-bisphosphate carboxylase form II	0	0	0	0.00483999	0.0101789	0.018529	0.00838845	0.0432551	0.0778383	0.035358	0.0120681	0.0197168	0.0607694	0.0546713	0.0396193	0.0445262	0.0675503	0.0229284
rbcL3	Ribulose-bisphosphate carboxylase form III	0.02049	0	0	0.0157534	0	0	0	0	0	0.0575425	0.072013	0.0427836	0.0263727	0.0197719	0.0122814	0.0241544	0.028188	0.0207301
rbcL4	Ribulose-bisphosphate carboxylase form IV	0.366737	0.390778	0.372391	1.10174	0.702797	1.06944	0.212667	0.269618	0.520637	1.4368	1.08711	1.00505	0.812937	0.884711	1.22731	0.960719	1.49674	0.915221
hhyL	Group 1h-[NiFe]-hydrogenase large subunit	28.3518	31.7984	28.342	9.87781	15.8365	20.8372	30.1155	30.215	25.9782	6.93963	6.72264	6.2779	8.40776	5.41802	7.21728	4.69703	4.76328	6.86998
hhmL	Group 1m-[NiFe]-hydrogenase large subunit	24.6976	19.9918	11.8635	4.01194	6.13072	10.9438	6.17019	5.19241	0.695415	3.52716	3.79784	6.70962	0.251634	0.150922	1.21018	0.804543	0.391206	0.609931
hylL	Group 1l-[NiFe]-hydrogenase large subunit	23.8817	25.19	15.2865	12.4799	10.8521	19.047	5.73713	5.82208	1.42584	4.48264	4.56734	7.79796	1.12834	1.15519	3.06797	2.4294	1.40052	2.00274
hucL	Group 2a-[NiFe]-hydrogenase large subunit	0.0324858	0.0119822	0.252347	0.0083254	0.017509	0.0717127	0.101004	0.028935	0.258857	0.116572	0.114173	0.0593521	0.28746	0.193308	0.267733	0.54571	1.01894	0.673763
coxS	Aerobic carbon-monoxide dehydrogenase small subunit	32.9744	37.483	40.5339	21.5945	26.6442	36.2983	35.3931	47.8975	56.3692	59.4559	68.4042	59.0429	73.557	72.3539	73.8864	73.2192	63.3183	48.6008
coxM	Aerobic carbon-monoxide dehydrogenase medium subunit	13.0774	13.8504	12.5771	6.1523	7.81192	12.8151	11.8868	13.1694	15.1259	17.8769	19.3096	16.3103	21.9115	20.1204	21.7982	18.747	17.2622	12.8652
coxL	Aerobic carbon-monoxide dehydrogenase large subunit	12.3997	14.3147	17.2079	5.54194	6.34213	12.2615	10.4429	22.642	24.3867	17.2532	20.6761	18.7336	24.3466	22.8758	22.9861	21.1122	17.5044	13.4411
CooF	Anaerobic carbon-monoxide dehydrogenase iron sulfur subunit	0.462064	0.852151	0.168907	0.438143	0.37356	0.136002	0.749108	0.61146	0.774464	0.403705	0.487183	0.39798	0.639327	1.0255	0.581605	0.422141	0.394108	0.373983
CooS	Anaerobic carbon-monoxide dehydrogenase catalytic subunit	0	0	0	0	0	0.00665692	0	0.00345339	0	0	0.0043357	0	0.0130996	0.0130945	0.0122006	0	0	0
mmoX	Methane monooxygenase component A alpha chain	2.13863	4.51091	2.09921	1.41284	0.572064	4.11878	2.56829	3.86216	7.22134	1.06278	1.12871	0.934448	3.27257	1.33502	2.76313	1.34925	1.66937	1.74057
nuoA	NADH-quinone oxidoreductase subunit A	21.3284	18.2304	25.0355	25.3662	24.7806	22.5859	21.5563	19.5172	19.6868	25.246	24.9321	26.2005	23.7943	26.5785	23.9986	25.1051	26.6708	19.2784
nuoB	NADH-quinone oxidoreductase subunit B	33.9949	31.9386	37.3893	35.5766	38.8177	40.1179	33.689	31.9815	31.95	44.5748	44.1633	45.3324	42.8113	45.8158	43.8415	41.3166	43.2874	32.2982
nuoC	NADH-quinone oxidoreductase subunit C	12.5167	11.0801	15.4516	26.7874	22.5941	15.3605	17.0705	13.8378	12.6179	19.5795	17.1504	16.6772	16.4932	18.2292	18.9034	17.9359	18.9241	15.4784
nuoD	NADH-quinone oxidoreductase subunit D	34.6916	33.9549	43.6194	43.4233	44.0907	42.5196	37.7856	35.7308	35.8496	48.8818	48.3868	48.8704	44.9185	49.184	47.5029	46.2428	48.1756	37.0995
atpA	F-type H+/Na+-transporting ATPase	33.365	33.1656	33.9077	46.1722	43.426	36.7339	37.5613	31.2017	36.5441	41.5774	41.4518	41.1347	39.3724	41.3543	40.683	41.5935	40.1228	32.2598
ctaD	Cytochrome c oxidase subunit I	44.8785	43.2396	42.9126	48.8227	47.4928	42.1911	52.5892	54.0675	52.5283	57.2205	57.0856	59.4061	49.5291	48.2462	44.7774	46.7172	46.3623	36.1264
sdhA	Succinate dehydrogenase / fumarate reductase, flavoprotein subunit	12.3108	11.3775	12.0849	27.2961	25.9183	17.3983	11.142	11.011	13.7586	18.4215	18.394	18.7555	17.639	18.3441	17.7675	21.1531	19.4744	14.5627
aclB	ATP-citrate lyase beta-subunit	0	0	0.0410548	0.224504	0.0484256	0.0440756	0.06485	0.108608	0.302422	0.217277	0.165064	0.13484	0.440889	0.404595	0.59912	0.337607	0.42025	0.436324
nifH	Nitrogenase iron protein	0.605318	0.446538	0.691481	0.868728	0.750376	0.504805	0.692326	0.600774	1.02289	0.670527	0.599545	0.584562	0.8278	0.700924	1.00682	2.33695	3.79726	3.3254
nirK	Copper-containing nitrite reductase	0.0706479	0.0868605	0.0860844	0.591448	0.0190387	0.103971	0.324257	0.209753	0.278238	0.0367411	0.082765	0.0245857	0.348569	0.492353	0.614008	0.492754	0.498908	0.195367
nirS	Nitrite reductase	0.0149294	0	0	0.0114783	0	0	0	0	0	0.00465851	0.00954003	0.00779325	0.0384314	0.0720311	0.0089485	0.00439985	0.036969	0.0211462
amoA	Ammonia monooxygenase subunit A	0	0.0896732	0.14812	0.612677	0	0	0.0269965	0.18561	0.111336	0.960914	1.28168	1.0893	0.352033	0.182465	0.582888	0.417954	0.735805	0.15578
narG	Nitrate reductase	0.0685114	0.0224623	0.410449	0.780355	0.1436	0.332354	6.35495	5.03682	2.78608	0.555827	0.413471	0.524528	2.97121	2.76439	2.4251	1.42683	1.75306	1.32467
pufL	Photosynthetic reaction center L subunit	0	0	0.0288176	0.266684	0.458883	0.0618759	0.266118	0.232719	0.927095	0.0590373	0.0201501	0.00823031	0.192787	0.141999	0.652074	3.45707	4.78919	4.52384
pufM	Photosynthetic reaction center M subunit	0	0	0.0511196	0.250871	0.444693	0.0960416	0.335416	0.306057	0.776178	0.0349088	0.0268082	0.00729988	0.125994	0.125946	0.737616	2.80249	4.47094	3.97847
pufC	Photosynthetic reaction center cytochrome c subunit	0	0.0169886	0	0.0767254	0.136535	0.0451892	0.153435	0.128935	0.291079	0.00718601	0.007358	0.0300538	0.0815134	0.0444447	0.358892	1.09271	1.95158	2.11558
psbB	Photosystem II CP47 chlorophyll apoprotein	0	0	0.0311732	0.00437096	0	0	0.181813	0.0998286	0.398339	0	0	0	0.0164641	0.0219437	0.306685	0.467457	0.943218	0.645351
psbC	Photosystem II CP43 chlorophyll apoprotein	0.0183067	0.0135047	0.0334601	0.00469162	0.0148003	0	0.142298	0.158399	0.37223	0	0	0	0.0117813	0.00588837	0.246888	0.507145	0.755533	0.714921
psaA	Photosystem I P700 chlorophyll a apoprotein A1	0.0462558	0.00853061	0.010568	0	0.0218143	0.0113456	0.400636	0.1648	0.699034	0.00721672	0	0	0.0186049	0.0148782	0.530242	0.981504	1.41585	1.39926
psaB	Photosystem I P700 chlorophyll a apoprotein A2	0.15305	0.0434244	0.0753136	0.58835	0.339477	0.0577537	0.504622	0.161788	0.575809	0.139597	0.173031	0.0737471	0.299274	0.424123	0.691547	1.08599	1.45117	1.3388
pscA	Photosystem P840 reaction center large subunit	0	0	0	0	0	0	0	0	0	0	0	0	0	0	0	0	0.00323219	0.00237703

## Sheet: SingleM_RPKM
Gene	TR1	TR2	TR3	NH1	NH2	NH3	MP1	MP2	MP3	TP1	TP2	TP3	SS1	SS2	SS3	AFH1	AFH2	AFH3
4.09	101757	98765	89362	77767.6	83872.5	87341.1	90073.4	90963.8	83963.5	86311.3	85156.9	85734.6	78043.7	79822.3	79193	84996.4	80847.9	101365
graftm_VEYiP	59324.9	59580.6	61842.3	69699.8	65275.4	64083.6	61592.8	60878.9	64091.6	61434.3	61835.4	59505.8	60278.5	60853.6	62990.9	64304.3	63702.9	78185.9
graftm0qHlwZ	284913	282586	259680	353080	340000	278280	265411	249666	274318	257018	262033	259471	283804	295901	285662	276679	281267	350135
graftm2Y_gKZ	79318.6	77719.2	100011	93621.9	87512.9	82165	114472	95047.9	31270.4	114657	96074.4	86194.4	114873	111420	119221	101452	116893	150326
graftm4pgsPY	597413	598621	586250	556881	586642	590486	587134	586803	615950	564921	567308	576336	566793	575706	552788	580402	566277	717894
graftm7rT8X6	85752.1	85495.2	87611.3	90228.2	87494.6	85739.9	84497.1	84539.5	85657.6	82821.8	81529.1	82625	81251.3	80924.2	81376	84763.7	82413.7	103694
graftm7uVKy7	182433	173177	195948	190159	187911	187739	178558	181699	194774	188886	183841	183338	186507	193195	182985	193867	186624	233762
graftmB1NpQZ	104989	88762.1	83379.2	112342	103595	113442	101035	72838.5	76546.8	85424.6	81284.9	80125.9	84174.2	82459.8	96454	89544.8	106221	131965
graftmJB0oez	67525.1	70127.7	67044.6	80455.6	75202.7	67429.4	72326.8	67544.6	63268.1	63777.6	63348.4	63069.1	62526.9	60591.6	62658.5	62741.7	61357.8	78283.7
graftmJtcVZm	93332	93411.9	106277	105814	105221	104417	98073.5	112160	114342	130374	139991	142703	120739	118541	123508	116448	120252	150096
graftmNF3uWk	265573	289146	273944	200600	205479	249691	255927	304630	305391	279744	281783	279873	288071	275354	269505	262887	250130	325785
graftmxpbgBP	86282.1	88070.9	79870.2	86068.1	80362.6	87709	81729.6	79701.7	83436.6	79637	80604.9	75103.8	87026.9	87516.3	94091.2	85309.9	101922	124482
graftmy2cybm	167692	166156	166430	163728	165378	161212	167369	164202	147550	161385	156062	158793	155247	148285	154973	152004	149222	187731
graftmzdRbba	76384.6	76490.6	88145.7	80736	82227.1	86089.9	94018.2	86341.4	82945	85473.1	87864	88647.1	89522.7	91419	91137.1	91290.8	88349.8	108948
Average	160906	160579	160414	161513	161155	160416	160873	159787	158822	160133	159194	158680	161347	161571	161182	160478	161106	203047
