# Supplementary material for: Atmospheric chemosynthesis is phylogenetically and geographically widespread and contributes significantly to carbon fixation throughout cold deserts
Source: Research Square preprint supplement (doi:10.21203/rs.3.rs-948000/v1), 2021-10-13
Supplement: Supplementary file 17 [file 71741b415d1e973d5511fb4b.csv]

Eukaryote Taxonomy (NCBI euk+nr)	TR1	TR2	TR3	NH1	NH2	NH3	MP1	MP2	MP3	TP1	TP2	TP3	SS1	SS2	SS3	AFH1	AFH2	AFH3
Amoebozoa	4.29E-05	6.03E-05	4.10E-05	0.000377729	5.40E-05	4.52E-05	4.20E-05	4.11E-05	5.75E-05	6.81E-05	5.88E-05	5.80E-05	6.23E-05	6.09E-05	5.85E-05	5.86E-05	5.54E-05	6.26E-05
Apicomplexa	0.000122537	0.000109696	0.000128789	0.000102716	9.72E-05	0.00011865	9.03E-05	8.96E-05	9.86E-05	0.000112239	0.00011663	0.000120095	8.71E-05	8.64E-05	9.43E-05	9.93E-05	8.95E-05	9.25E-05
Apusozoa	9.37E-06	6.94E-06	1.29E-05	3.03E-05	8.74E-06	1.15E-05	9.09E-06	1.32E-05	1.20E-05	1.35E-05	1.24E-05	1.48E-05	1.08E-05	1.27E-05	1.24E-05	1.31E-05	1.04E-05	1.13E-05
Ascomycota	0.00150839	0.001547573	0.001543644	0.001336904	0.001317329	0.001505974	0.002045114	0.003440433	0.008664372	0.001929331	0.00178342	0.001689475	0.001445132	0.00143841	0.001798189	0.001906107	0.003618566	0.007304946
Basidiomycota	0.000893065	0.000905529	0.000850703	0.000709739	0.000690523	0.000835626	0.000628337	0.000807068	0.000992749	0.000791945	0.000817904	0.000856206	0.000877801	0.000700911	0.000703779	0.000728123	0.000736898	0.000795303
Bigyra	3.01E-05	3.77E-05	3.47E-05	5.21E-05	2.92E-05	2.94E-05	2.07E-05	2.56E-05	2.70E-05	2.97E-05	2.76E-05	3.10E-05	2.61E-05	2.56E-05	2.68E-05	2.72E-05	2.35E-05	2.38E-05
Blastocladiomycota	1.71E-05	2.10E-05	2.46E-05	2.87E-05	2.20E-05	2.37E-05	1.72E-05	1.87E-05	1.99E-05	2.22E-05	2.42E-05	2.61E-05	1.94E-05	1.83E-05	1.86E-05	2.16E-05	1.86E-05	1.96E-05
Centroplasthelida	4.86E-07	1.53E-07	2.28E-07	1.27E-06	2.28E-07	3.85E-08	3.82E-08	0	0	1.61E-07	8.30E-08	1.08E-07	7.80E-08	8.05E-08	0	0	0	1.51E-07
Cercozoa	1.39E-07	3.43E-07	2.65E-07	1.53E-06	5.32E-07	3.85E-07	1.15E-07	4.85E-07	1.02E-06	3.62E-07	2.90E-07	3.61E-07	6.63E-07	4.83E-07	6.37E-07	3.56E-07	7.99E-07	4.84E-07
Chlorophyta	0.000280066	0.000283662	0.000295729	0.000297388	0.000246664	0.000286737	0.000361451	0.000477054	0.001250213	0.000283934	0.00029311	0.000310154	0.000214245	0.000202951	0.000264652	0.000341338	0.00036222	0.000462339
Chytridiomycota	6.36E-05	6.39E-05	5.99E-05	9.60E-05	6.27E-05	6.92E-05	5.01E-05	5.43E-05	6.59E-05	6.77E-05	6.22E-05	6.57E-05	5.96E-05	6.14E-05	6.10E-05	6.76E-05	5.98E-05	6.80E-05
Ciliophora	1.56E-05	2.06E-05	1.73E-05	5.59E-05	3.06E-05	1.69E-05	1.71E-05	1.75E-05	2.46E-05	2.79E-05	3.16E-05	2.43E-05	8.85E-05	6.56E-05	5.37E-05	0.00027771	0.000153062	0.000284063
Cryptomycota	1.98E-06	1.56E-06	3.41E-06	1.05E-05	1.82E-06	1.65E-06	2.37E-06	2.82E-06	4.71E-06	3.18E-06	2.78E-06	3.35E-06	4.64E-06	3.94E-06	4.27E-06	5.22E-06	4.86E-06	6.11E-06
Cryptophyta	1.04E-07	1.53E-07	3.79E-08	1.08E-06	3.80E-08	7.69E-08	0	0	4.10E-08	4.02E-08	8.30E-08	0	0	0	0	3.95E-08	0	3.02E-08
Endomyxa	9.23E-06	9.08E-06	6.75E-06	2.80E-05	1.53E-05	8.00E-06	6.72E-06	9.08E-06	1.45E-05	9.25E-06	1.13E-05	1.19E-05	9.67E-06	8.77E-06	8.50E-06	8.73E-06	8.29E-06	8.53E-06
Euglenozoa	9.09E-05	9.90E-05	9.79E-05	9.74E-05	8.80E-05	8.51E-05	6.85E-05	7.18E-05	7.71E-05	8.88E-05	9.22E-05	9.56E-05	7.47E-05	7.44E-05	7.30E-05	8.17E-05	6.92E-05	7.35E-05
Foraminifera	3.40E-06	2.29E-06	3.68E-06	1.12E-05	3.27E-06	4.81E-06	5.31E-06	4.06E-06	7.82E-06	5.39E-06	6.22E-06	5.59E-06	8.97E-06	6.60E-06	7.60E-06	8.81E-06	8.53E-06	8.23E-06
Fornicata	5.38E-06	6.10E-06	5.80E-06	5.14E-06	4.37E-06	6.58E-06	6.15E-06	6.53E-06	8.52E-06	7.84E-06	7.88E-06	8.48E-06	6.67E-06	6.60E-06	7.64E-06	7.55E-06	6.83E-06	7.17E-06
Haptista	4.85E-05	4.23E-05	4.47E-05	4.65E-05	3.49E-05	4.47E-05	2.59E-05	3.54E-05	3.60E-05	4.04E-05	4.23E-05	5.00E-05	3.26E-05	3.31E-05	3.55E-05	3.72E-05	3.10E-05	3.50E-05
Heterolobosea	5.83E-06	6.29E-06	6.52E-06	2.25E-05	2.38E-05	7.00E-06	7.07E-06	8.73E-06	1.08E-05	8.44E-06	7.34E-06	7.25E-06	9.63E-06	8.90E-06	8.39E-06	9.48E-06	9.76E-06	1.17E-05
Imbricatea	2.81E-06	5.00E-06	1.52E-06	8.94E-07	1.94E-06	2.23E-06	1.83E-06	2.29E-06	2.09E-06	1.97E-06	1.78E-06	2.09E-06	1.25E-06	1.57E-06	1.50E-06	2.13E-06	1.53E-06	1.91E-06
Microsporidia	3.37E-06	3.09E-06	4.44E-06	9.64E-06	7.94E-06	7.39E-06	6.87E-06	4.19E-06	5.49E-06	5.11E-06	5.60E-06	5.84E-06	6.12E-06	5.76E-06	6.52E-06	8.18E-06	7.76E-06	7.77E-06
Mucoromycota	6.31E-05	7.34E-05	7.12E-05	0.000117682	7.78E-05	7.16E-05	6.15E-05	6.94E-05	0.000107516	0.000125947	9.40E-05	9.27E-05	8.20E-05	7.26E-05	0.000109875	8.02E-05	0.000103863	0.000114345
Ochrophyta	8.08E-05	7.48E-05	9.47E-05	9.75E-05	7.90E-05	8.86E-05	6.73E-05	7.06E-05	6.98E-05	8.73E-05	9.24E-05	9.30E-05	6.54E-05	6.68E-05	0.000274913	9.07E-05	6.99E-05	9.22E-05
Olpidiomycota	0	0	0	3.72E-08	0	0	0	4.41E-08	0	0	0	0	0	0	3.74E-08	0	6.66E-08	3.02E-08
Oomycota	0.00011799	0.000127699	0.000123972	0.000155767	0.000114745	0.000117726	9.55E-05	0.000102642	0.00011968	0.000123294	0.000126543	0.000126442	0.000108819	0.00010695	0.000114781	0.000119905	0.00010736	0.000118034
Parabasalia	5.83E-06	5.07E-06	6.52E-06	1.71E-05	9.50E-06	5.62E-06	6.07E-06	4.23E-06	6.64E-06	6.35E-06	6.43E-06	6.67E-06	7.84E-06	8.25E-06	7.60E-06	7.51E-06	8.69E-06	8.83E-06
Perkinsozoa	7.26E-06	5.26E-06	5.95E-06	8.30E-06	4.10E-06	5.39E-06	4.81E-06	4.54E-06	4.59E-06	5.15E-06	4.98E-06	5.52E-06	4.99E-06	5.35E-06	5.09E-06	5.45E-06	5.20E-06	5.38E-06
Preaxostyla	2.46E-06	2.17E-06	2.47E-06	5.40E-06	2.47E-06	2.23E-06	2.25E-06	1.50E-06	3.89E-06	2.13E-06	1.99E-06	2.42E-06	2.69E-06	3.62E-06	3.26E-06	3.56E-06	3.03E-06	2.99E-06
Rhodophyta	0.000149753	0.000152187	0.000138725	0.000145232	0.000125726	0.000132538	8.05E-05	9.68E-05	9.47E-05	0.000122772	0.000126294	0.000132104	8.46E-05	8.22E-05	8.85E-05	9.51E-05	8.11E-05	8.58E-05
Zoopagomycota	2.83E-05	2.75E-05	3.45E-05	6.05E-05	3.04E-05	3.47E-05	2.99E-05	2.50E-05	4.03E-05	3.61E-05	3.62E-05	3.67E-05	3.43E-05	3.68E-05	3.44E-05	3.61E-05	3.26E-05	3.84E-05
Other	8.88E-05	8.84E-05	0.000135349	0.000195454	0.000117367	0.00011134	8.59E-05	0.000102201	0.00012181	0.000119274	0.000117086	0.000124927	9.82E-05	9.68E-05	0.000106505	0.000114846	0.00010686	0.000122782
