# Supplementary material for: Atmospheric chemosynthesis is phylogenetically and geographically widespread and contributes significantly to carbon fixation throughout cold deserts
Source: Research Square preprint supplement (doi:10.21203/rs.3.rs-948000/v1), 2021-10-13
Supplement: Supplementary file 18 [file aeebac9fbca6ee721b0e66a9.xlsx]

## Sheet: Sheet 1
				Aerobic carbon monoxide dehydrogenase	Ribulose-bisphosphate carboxylase form IA	Ribulose-bisphosphate carboxylase form IB	Ribulose-bisphosphate carboxylase form IC	Ribulose-bisphosphate carboxylase form ID	Ribulose-bisphosphate carboxylase form IE	Ribulose-bisphosphate carboxylase form II	Ribulose-bisphosphate carboxylase form III	Ribulose-bisphosphate carboxylase form IV	Group 1h-[NiFe]-hydrogenase large subunit	Group 1l-[NiFe]-hydrogenase large subunit	Group 1m-[NiFe]-hydrogenase large subunit
Bin #	Genome_ID	Phylogeny	Phyla	CODH with active-site loop	rbcL1A	rbcL1B	rbcL1C	rbcL1D	rbcL1E	rbcL2	rbcL3	rbcL4	hhyL	hylL	hhmL
22	AFH1_1	d__Bacteria;p__Acidobacteriota;c__Blastocatellia;o__Pyrinomonadales;f__Pyrinomonadaceae;g__UBA11741;s__	Acidobacteriota	0	0	0	0	0	0	0	0	0	0	0	0
27	AFH1_10	d__Bacteria;p__Acidobacteriota;c__Vicinamibacteria;o__Vicinamibacterales;f__UBA2999;g__;s__	Acidobacteriota	0	0	0	0	0	0	0	0	0	0	0	0
24	AFH1_2	d__Bacteria;p__Acidobacteriota;c__Thermoanaerobaculia;o__UBA5066;f__Gp7-AA6;g__Gp7-AA6;s__	Acidobacteriota	0	0	0	0	0	0	0	0	0	0	0	0
3	AFH1_3	d__Archaea;p__Thermoproteota;c__Nitrososphaeria;o__Nitrososphaerales;f__Nitrososphaeraceae;g__TA-21;s__	Thermoproteota	0	0	0	0	0	0	0	0	0	0	0	0
6	AFH1_4	d__Archaea;p__Thermoproteota;c__Nitrososphaeria;o__Nitrososphaerales;f__Nitrososphaeraceae;g__UBA10452;s__	Thermoproteota	0	0	0	0	0	0	0	0	0	0	0	0
159	AFH1_5	d__Bacteria;p__Cyanobacteria;c__Cyanobacteriia;o__Elainellales;f__Elainellaceae;g__;s__	Cyanobacteria	0	0	0	0	0	0	0	0	0	0	0	0
182	AFH1_6	d__Bacteria;p__Gemmatimonadota;c__Gemmatimonadetes;o__Gemmatimonadales;f__GWC2-71-9;g__;s__	Gemmatimonadota	0	0	0	0	0	0	0	0	0	0	0	0
83	AFH1_7	d__Bacteria;p__Actinobacteriota;c__Thermoleophilia;o__Gaiellales;f__Gaiellaceae;g__VAXT01;s__	Actinobacteriota	0	0	0	0	0	0	0	0	0	0	0	0
123	AFH1_9	d__Bacteria;p__Bacteroidota;c__Bacteroidia;o__Chitinophagales;f__Chitinophagaceae;g__UBA2791;s__	Bacteroidota	0	0	0	0	0	0	0	0	0	0	0	0
1	AFH2_1	d__Archaea;p__Thermoproteota;c__Nitrososphaeria;o__Nitrososphaerales;f__Nitrososphaeraceae;g__TA-21;s__	Thermoproteota	0	0	0	0	0	0	0	0	0	0	0	0
21	AFH2_2	d__Bacteria;p__Acidobacteriota;c__Blastocatellia;o__Pyrinomonadales;f__Pyrinomonadaceae;g__UBA11740;s__	Acidobacteriota	0	0	0	0	0	0	0	0	0	0	0	0
158	AFH2_3	d__Bacteria;p__Cyanobacteria;c__Cyanobacteriia;o__Cyanobacteriales;f__Coleofasciculaceae;g__PCC7113;s__	Cyanobacteria	0	0	0	0	0	0	0	0	0	0	0	0
128	AFH2_7	d__Bacteria;p__Bacteroidota;c__Bacteroidia;o__Cytophagales;f__Hymenobacteraceae;g__Hymenobacter;s__	Bacteroidota	0	0	0	0	0	0	0	0	0	0	0	0
14	AFH3_1	d__Bacteria;p__Acidobacteriota;c__Acidobacteriae;o__UBA7541;f__UBA7541;g__UBA7541;s__	Acidobacteriota	0	0	0	0	1	0	0	0	0	0	0	0
55	MP1_1	d__Bacteria;p__Actinobacteriota;c__Actinomycetia;o__Mycobacteriales;f__Pseudonocardiaceae;g__GCA-003244245;s__GCA-003244245 sp003244055	Actinobacteriota	0	0	0	0	0	1	0	0	0	1	0	0
228	MP1_10	d__Bacteria;p__Verrucomicrobiota;c__Verrucomicrobiae;o__Chthoniobacterales;f__UBA10450;g__Palsa-1392;s__	Verrucomicrobiota	0	0	0	0	0	0	0	0	0	1	0	0
147	MP1_11	d__Bacteria;p__Chloroflexota;c__Chloroflexia;o__Thermomicrobiales;f__UBA6265;g__;s__	Chloroflexota	0	0	0	0	0	0	0	0	0	0	0	0
212	MP1_12	d__Bacteria;p__Proteobacteria;c__Gammaproteobacteria;o__Xanthomonadales;f__Xanthomonadaceae;g__WF-2;s__	Proteobacteria	0	0	0	0	0	0	0	0	0	1	0	0
17	MP1_14	d__Bacteria;p__Acidobacteriota;c__Blastocatellia;o__Pyrinomonadales;f__Pyrinomonadaceae;g__GCA-002050365;s__	Acidobacteriota	0	0	0	0	0	0	0	0	0	1	0	0
101	MP1_15	d__Bacteria;p__Actinobacteriota;c__Thermoleophilia;o__Solirubrobacterales;f__Solirubrobacteraceae;g__SEOHO-28;s__	Actinobacteriota	1	0	0	0	0	0	0	0	0	0	0	0
143	MP1_16	d__Bacteria;p__Chloroflexota;c__Chloroflexia;o__54-19;f__;g__;s__	Chloroflexota	0	0	0	0	0	0	0	0	0	0	0	0
57	MP1_17	d__Bacteria;p__Actinobacteriota;c__Actinomycetia;o__Mycobacteriales;f__QHCA01;g__;s__	Actinobacteriota	1	0	0	0	0	0	0	0	0	1	0	0
129	MP1_18	d__Bacteria;p__Bacteroidota;c__Bacteroidia;o__Cytophagales;f__Spirosomaceae;g__Spirosoma;s__	Bacteroidota	0	0	0	0	0	0	0	0	0	0	1	0
60	MP1_2	d__Bacteria;p__Actinobacteriota;c__Actinomycetia;o__Mycobacteriales;f__QHCE01;g__QHCE01;s__QHCE01 sp003243955	Actinobacteriota	0	0	0	0	0	0	0	0	0	0	0	0
78	MP1_20	d__Bacteria;p__Actinobacteriota;c__Thermoleophilia;o__Gaiellales;f__F1-60-MAGs149;g__;s__	Actinobacteriota	1	0	0	0	0	0	0	0	0	1	0	0
211	MP1_21	d__Bacteria;p__Proteobacteria;c__Gammaproteobacteria;o__Xanthomonadales;f__Xanthomonadaceae;g__Luteimonas;s__	Proteobacteria	0	0	0	0	0	0	0	0	0	0	0	0
119	MP1_22	d__Bacteria;p__Bacteroidota;c__Bacteroidia;o__Chitinophagales;f__Chitinophagaceae;g__Palsa-955;s__	Bacteroidota	0	0	0	0	0	0	0	0	0	0	0	0
91	MP1_23	d__Bacteria;p__Actinobacteriota;c__Thermoleophilia;o__Solirubrobacterales;f__Solirubrobacteraceae;g__;s__	Actinobacteriota	0	0	0	0	0	1	0	0	0	0	0	0
81	MP1_24	d__Bacteria;p__Actinobacteriota;c__Thermoleophilia;o__Gaiellales;f__Gaiellaceae;g__;s__	Actinobacteriota	0	0	0	0	0	0	0	0	0	0	0	0
185	MP1_25	d__Bacteria;p__Myxococcota;c__Polyangia;o__Haliangiales;f__Haliangiaceae;g__;s__	Myxococcota	0	0	0	0	0	0	0	0	0	0	0	0
19	MP1_26	d__Bacteria;p__Acidobacteriota;c__Blastocatellia;o__Pyrinomonadales;f__Pyrinomonadaceae;g__OLB17;s__	Acidobacteriota	0	0	0	0	0	0	0	0	0	0	0	0
116	MP1_27	d__Bacteria;p__Bacteroidota;c__Bacteroidia;o__Chitinophagales;f__Chitinophagaceae;g__UBA7600;s__	Bacteroidota	0	0	0	0	0	0	0	0	0	0	0	0
39	MP1_28	d__Bacteria;p__Actinobacteriota;c__Actinomycetia;o__Actinomycetales;f__Dermatophilaceae;g__Terracoccus;s__	Actinobacteriota	0	0	0	0	0	0	0	0	0	0	0	0
10	MP1_29	d__Bacteria;p__Acidobacteriota;c__Acidobacteriae;o__Acidobacteriales;f__Acidobacteriaceae;g__Edaphobacter;s__	Acidobacteriota	0	0	0	0	0	0	0	0	0	1	0	0
38	MP1_3	d__Bacteria;p__Actinobacteriota;c__Actinomycetia;o__Actinomycetales;f__Dermatophilaceae;g__Lapillicoccus;s__	Actinobacteriota	0	0	0	0	0	0	0	0	0	1	0	0
93	MP1_30	d__Bacteria;p__Actinobacteriota;c__Thermoleophilia;o__Solirubrobacterales;f__Solirubrobacteraceae;g__;s__	Actinobacteriota	0	0	0	0	0	1	0	0	0	1	0	0
49	MP1_32	d__Bacteria;p__Actinobacteriota;c__Actinomycetia;o__Mycobacteriales;f__Jatrophihabitantaceae;g__Jatrophihabitans;s__	Actinobacteriota	1	0	0	0	0	0	0	0	0	0	0	0
225	MP1_33	d__Bacteria;p__Verrucomicrobiota;c__Verrucomicrobiae;o__Chthoniobacterales;f__UBA10450;g__;s__	Verrucomicrobiota	0	0	0	0	0	0	0	0	0	0	0	0
15	MP1_4	d__Bacteria;p__Acidobacteriota;c__Blastocatellia;o__Pyrinomonadales;f__Pyrinomonadaceae;g__;s__	Acidobacteriota	0	0	0	0	0	0	0	0	0	1	0	0
230	MP1_43	d__Bacteria;p__Verrucomicrobiota;c__Verrucomicrobiae;o__Chthoniobacterales;f__UBA10450;g__Palsa-1392;s__	Verrucomicrobiota	0	0	0	0	0	0	0	0	0	0	0	0
54	MP1_5	d__Bacteria;p__Actinobacteriota;c__Actinomycetia;o__Mycobacteriales;f__Pseudonocardiaceae;g__GCA-003244245;s__	Actinobacteriota	0	0	0	0	0	1	0	0	0	0	0	0
94	MP1_50	d__Bacteria;p__Actinobacteriota;c__Thermoleophilia;o__Solirubrobacterales;f__Solirubrobacteraceae;g__;s__	Actinobacteriota	0	0	0	0	0	0	0	0	0	0	0	0
65	MP1_52	d__Bacteria;p__Actinobacteriota;c__Actinomycetia;o__Propionibacteriales;f__Nocardioidaceae;g__Nocardioides;s__	Actinobacteriota	0	0	0	0	0	0	0	0	0	0	0	0
189	MP1_6	d__Bacteria;p__Patescibacteria;c__Saccharimonadia;o__Saccharimonadales;f__UBA4665;g__GCA-2746885;s__	Patescibacteria	0	0	0	0	0	0	0	0	0	0	0	0
50	MP1_7	d__Bacteria;p__Actinobacteriota;c__Actinomycetia;o__Mycobacteriales;f__Jatrophihabitantaceae;g__QHCC01;s__	Actinobacteriota	0	0	0	0	0	0	0	0	0	1	0	0
142	MP1_8	d__Bacteria;p__Chloroflexota;c__Ellin6529;o__QHBO01;f__QHBO01;g__QHBO01;s__QHBO01 sp003243965	Chloroflexota	0	0	0	0	0	0	0	0	0	0	0	0
221	MP1_9	d__Bacteria;p__Verrucomicrobiota;c__Verrucomicrobiae;o__Chthoniobacterales;f__UBA10450;g__;s__	Verrucomicrobiota	0	0	0	0	0	0	0	0	0	1	0	0
11	MP2_1	d__Bacteria;p__Acidobacteriota;c__Acidobacteriae;o__Bryobacterales;f__Bryobacteraceae;g__;s__	Acidobacteriota	0	0	0	0	0	0	0	0	0	0	0	0
31	MP2_10	d__Bacteria;p__Actinobacteriota;c__Acidimicrobiia;o__Acidimicrobiales;f__QHCF01;g__QHCF01;s__QHCF01 sp003244275	Actinobacteriota	1	0	0	0	0	0	0	0	0	0	0	0
29	MP2_11	d__Bacteria;p__Actinobacteriota;c__Acidimicrobiia;o__Acidimicrobiales;f__AC-14;g__;s__	Actinobacteriota	0	0	0	0	0	1	0	0	0	0	0	0
157	MP2_12	d__Bacteria;p__Chloroflexota;c__UBA6077;o__UBA6077;f__CF-72;g__CF-72;s__	Chloroflexota	0	0	0	0	0	0	0	0	0	1	0	0
95	MP2_13	d__Bacteria;p__Actinobacteriota;c__Thermoleophilia;o__Solirubrobacterales;f__Solirubrobacteraceae;g__Palsa-465;s__	Actinobacteriota	0	0	0	0	0	1	0	0	0	1	0	0
51	MP2_14	d__Bacteria;p__Actinobacteriota;c__Actinomycetia;o__Mycobacteriales;f__Jatrophihabitantaceae;g__QHCC01;s__QHCC01 sp003243915	Actinobacteriota	0	0	0	0	0	1	0	0	0	1	0	0
100	MP2_15	d__Bacteria;p__Actinobacteriota;c__Thermoleophilia;o__Solirubrobacterales;f__Solirubrobacteraceae;g__QHBW01;s__QHBW01 sp003244205	Actinobacteriota	0	0	0	0	0	0	0	0	0	1	0	0
144	MP2_16	d__Bacteria;p__Chloroflexota;c__Chloroflexia;o__54-19;f__;g__;s__	Chloroflexota	0	0	0	0	0	1	0	0	0	0	0	0
99	MP2_18	d__Bacteria;p__Actinobacteriota;c__Thermoleophilia;o__Solirubrobacterales;f__Solirubrobacteraceae;g__QHBW01;s__	Actinobacteriota	0	0	0	0	0	0	0	0	0	0	0	0
62	MP2_19	d__Bacteria;p__Actinobacteriota;c__Actinomycetia;o__Propionibacteriales;f__Nocardioidaceae;g__;s__	Actinobacteriota	0	0	0	0	0	1	0	0	0	0	0	0
172	MP2_2	d__Bacteria;p__Eremiobacterota;c__Eremiobacteria;o__UBP12;f__UBA5184;g__Palsa-1515;s__	Eremiobacterota	0	0	0	0	0	1	0	0	0	1	0	0
227	MP2_20	d__Bacteria;p__Verrucomicrobiota;c__Verrucomicrobiae;o__Chthoniobacterales;f__UBA10450;g__AV69;s__	Verrucomicrobiota	0	0	0	0	0	0	0	0	0	0	0	0
153	MP2_22	d__Bacteria;p__Chloroflexota;c__Ktedonobacteria;o__Ktedonobacterales;f__Ktedonobacteraceae;g__;s__	Chloroflexota	0	0	0	0	0	1	0	0	0	0	0	0
208	MP2_23	d__Bacteria;p__Proteobacteria;c__Gammaproteobacteria;o__Xanthomonadales;f__Rhodanobacteraceae;g__;s__	Proteobacteria	0	0	0	0	0	0	0	0	0	0	0	0
52	MP2_24	d__Bacteria;p__Actinobacteriota;c__Actinomycetia;o__Mycobacteriales;f__Nakamurellaceae;g__Nakamurella;s__	Actinobacteriota	0	0	0	0	0	0	0	0	0	0	0	0
167	MP2_25	d__Bacteria;p__Dormibacterota;c__Dormibacteria;o__UBA8260;f__UBA8260;g__;s__	Dormibacterota	0	0	0	0	0	0	0	0	0	0	0	0
122	MP2_28	d__Bacteria;p__Bacteroidota;c__Bacteroidia;o__Chitinophagales;f__Chitinophagaceae;g__;s__	Bacteroidota	0	0	0	0	0	0	0	0	0	0	0	0
98	MP2_29	d__Bacteria;p__Actinobacteriota;c__Thermoleophilia;o__Solirubrobacterales;f__Solirubrobacteraceae;g__Palsa-465;s__	Actinobacteriota	0	0	0	0	0	0	0	0	0	0	0	0
165	MP2_3	d__Bacteria;p__Dormibacterota;c__Dormibacteria;o__Dormibacterales;f__Dormibacteraceae;g__Dormibacter;s__	Dormibacterota	1	0	0	0	0	1	0	0	0	1	0	0
58	MP2_30	d__Bacteria;p__Actinobacteriota;c__Actinomycetia;o__Mycobacteriales;f__QHCA01;g__;s__	Actinobacteriota	0	0	0	0	0	0	0	0	0	1	0	0
171	MP2_4	d__Bacteria;p__Eremiobacterota;c__Eremiobacteria;o__Eremiobacterales;f__Eremiobacteraceae;g__Eremiobacter;s__Eremiobacter sp003244105	Eremiobacterota	0	0	0	0	0	1	0	0	0	1	0	0
56	MP2_5	d__Bacteria;p__Actinobacteriota;c__Actinomycetia;o__Mycobacteriales;f__Pseudonocardiaceae;g__GCA-003244245;s__GCA-003244245 sp003244245	Actinobacteriota	0	0	0	0	0	1	0	0	0	1	0	0
156	MP2_6	d__Bacteria;p__Chloroflexota;c__UBA5177;o__UBA5177;f__UBA5177;g__;s__	Chloroflexota	0	0	0	0	0	0	0	0	0	1	0	0
59	MP2_7	d__Bacteria;p__Actinobacteriota;c__Actinomycetia;o__Mycobacteriales;f__QHCD01;g__QHCD01;s__QHCD01 sp003244255	Actinobacteriota	1	0	0	0	0	1	0	0	0	1	0	0
173	MP2_8	d__Bacteria;p__Eremiobacterota;c__Eremiobacteria;o__UBP12;f__UBA5184;g__QHBJ01;s__QHBJ01 sp003243975	Eremiobacterota	0	0	0	0	0	0	0	0	0	0	0	0
12	MP3_1	d__Bacteria;p__Acidobacteriota;c__Acidobacteriae;o__Bryobacterales;f__Bryobacteraceae;g__;s__	Acidobacteriota	0	0	0	0	0	0	0	0	0	1	0	0
166	MP3_10	d__Bacteria;p__Dormibacterota;c__Dormibacteria;o__Dormibacterales;f__Dormibacteraceae;g__QHBS01;s__QHBS01 sp003243885	Dormibacterota	1	0	0	0	0	0	0	0	0	1	0	0
223	MP3_11	d__Bacteria;p__Verrucomicrobiota;c__Verrucomicrobiae;o__Chthoniobacterales;f__UBA10450;g__;s__	Verrucomicrobiota	0	0	0	0	0	0	0	0	0	1	0	0
152	MP3_12	d__Bacteria;p__Chloroflexota;c__Ktedonobacteria;o__Ktedonobacterales;f__Ktedonobacteraceae;g__;s__	Chloroflexota	0	0	0	0	0	1	0	0	0	1	1	0
121	MP3_13	d__Bacteria;p__Bacteroidota;c__Bacteroidia;o__Chitinophagales;f__Chitinophagaceae;g__Parafilimonas;s__	Bacteroidota	0	0	0	0	0	0	0	0	0	0	0	0
155	MP3_15	d__Bacteria;p__Chloroflexota;c__Ktedonobacteria;o__Ktedonobacterales;f__Ktedonobacteraceae;g__UBA11361;s__	Chloroflexota	1	0	0	0	0	1	0	0	0	1	0	0
8	MP3_16	d__Bacteria;p__Acidobacteriota;c__Acidobacteriae;o__Acidobacteriales;f__Acidobacteriaceae;g__;s__	Acidobacteriota	0	0	0	0	0	0	0	0	0	0	0	0
96	MP3_17	d__Bacteria;p__Actinobacteriota;c__Thermoleophilia;o__Solirubrobacterales;f__Solirubrobacteraceae;g__Palsa-465;s__	Actinobacteriota	1	0	0	0	0	1	0	0	0	1	0	0
170	MP3_18	d__Bacteria;p__Dormibacterota;c__Dormibacteria;o__UBA8260;f__UBA8260;g__Palsa-875;s__Palsa-875 sp003244045	Dormibacterota	0	0	0	0	0	1	0	0	0	1	0	0
186	MP3_19	d__Bacteria;p__Myxococcota;c__Polyangia;o__Polyangiales;f__Polyangiaceae;g__;s__	Myxococcota	0	0	0	0	0	0	0	0	0	0	0	0
220	MP3_2	d__Bacteria;p__Verrucomicrobiota;c__Verrucomicrobiae;o__Chthoniobacterales;f__UBA10450;g__;s__	Verrucomicrobiota	0	0	0	0	0	0	0	0	0	1	0	0
120	MP3_20	d__Bacteria;p__Bacteroidota;c__Bacteroidia;o__Chitinophagales;f__Chitinophagaceae;g__Palsa-955;s__	Bacteroidota	0	0	0	0	0	0	0	0	0	0	0	0
169	MP3_25	d__Bacteria;p__Dormibacterota;c__Dormibacteria;o__UBA8260;f__UBA8260;g__Palsa-875;s__	Dormibacterota	0	0	0	0	0	0	0	0	0	0	0	0
168	MP3_26	d__Bacteria;p__Dormibacterota;c__Dormibacteria;o__UBA8260;f__UBA8260;g__Palsa-875;s__	Dormibacterota	0	0	0	0	0	0	0	0	0	0	0	0
32	MP3_4	d__Bacteria;p__Actinobacteriota;c__Acidimicrobiia;o__IMCC26256;f__PALSA-555;g__;s__	Actinobacteriota	0	0	0	0	0	0	0	0	0	0	0	0
154	MP3_5	d__Bacteria;p__Chloroflexota;c__Ktedonobacteria;o__Ktedonobacterales;f__Ktedonobacteraceae;g__CF-113;s__	Chloroflexota	1	0	0	0	0	1	0	0	0	1	0	0
67	MP3_6	d__Bacteria;p__Actinobacteriota;c__Actinomycetia;o__Streptosporangiales;f__Streptosporangiaceae;g__PALSA-505;s__	Actinobacteriota	0	0	0	0	0	1	0	0	0	1	0	0
13	MP3_7	d__Bacteria;p__Acidobacteriota;c__Acidobacteriae;o__Bryobacterales;f__Bryobacteraceae;g__;s__	Acidobacteriota	0	0	0	0	0	0	0	0	1	1	0	0
195	MP3_8	d__Bacteria;p__Proteobacteria;c__Alphaproteobacteria;o__Caulobacterales;f__Caulobacteraceae;g__Palsa-881;s__	Proteobacteria	0	0	0	0	0	0	0	0	0	1	0	0
9	MP3_9	d__Bacteria;p__Acidobacteriota;c__Acidobacteriae;o__Acidobacteriales;f__Acidobacteriaceae;g__Edaphobacter;s__	Acidobacteriota	0	0	0	0	0	0	0	0	0	1	0	0
174	NH1_1	d__Bacteria;p__Gemmatimonadota;c__Gemmatimonadetes;o__SG8-23;f__SKRI01;g__;s__	Gemmatimonadota	0	0	0	0	0	0	0	0	0	0	0	0
188	NH1_12	d__Bacteria;p__Myxococcota;c__UBA796;o__UBA796;f__GCA-2862545;g__;s__	Myxococcota	0	0	0	0	0	0	0	0	0	0	0	0
204	NH1_13	d__Bacteria;p__Proteobacteria;c__Alphaproteobacteria;o__Sphingomonadales;f__Sphingomonadaceae;g__Allosphingosinicella;s__	Proteobacteria	0	0	0	0	0	0	0	0	0	0	0	0
202	NH1_14	d__Bacteria;p__Proteobacteria;c__Alphaproteobacteria;o__Sphingomonadales;f__Sphingomonadaceae;g__Sphingomonas_A;s__	Proteobacteria	0	0	0	0	0	0	0	0	0	0	1	0
53	NH1_17	d__Bacteria;p__Actinobacteriota;c__Actinomycetia;o__Mycobacteriales;f__Pseudonocardiaceae;g__;s__	Actinobacteriota	0	0	0	0	0	1	0	0	0	1	0	0
196	NH1_18	d__Bacteria;p__Proteobacteria;c__Alphaproteobacteria;o__Rhizobiales;f__Rhizobiaceae;g__Mesorhizobium_A;s__	Proteobacteria	0	0	0	0	0	0	0	0	0	0	0	0
190	NH1_2	d__Bacteria;p__Planctomycetota;c__Phycisphaerae;o__UBA1161;f__;g__;s__	Planctomycetota	0	0	0	0	0	0	0	0	0	0	0	0
149	NH1_20	d__Bacteria;p__Chloroflexota;c__Chloroflexia;o__Thermomicrobiales;f__UBA6265;g__;s__	Chloroflexota	0	0	0	0	0	0	0	0	0	1	0	0
130	NH1_22	d__Bacteria;p__Bacteroidota;c__Bacteroidia;o__Flavobacteriales;f__Flavobacteriaceae;g__Gillisia;s__	Bacteroidota	0	0	0	0	0	0	0	0	0	0	0	0
132	NH1_23	d__Bacteria;p__Bacteroidota;c__Bacteroidia;o__Flavobacteriales;f__Flavobacteriaceae;g__Gillisia;s__	Bacteroidota	0	0	0	0	0	0	0	0	0	0	0	0
203	NH1_26	d__Bacteria;p__Proteobacteria;c__Alphaproteobacteria;o__Sphingomonadales;f__Sphingomonadaceae;g__Sphingorhabdus_A;s__	Proteobacteria	0	0	0	0	0	0	0	0	0	0	0	0
125	NH1_28	d__Bacteria;p__Bacteroidota;c__Bacteroidia;o__Cytophagales;f__Cyclobacteriaceae;g__;s__	Bacteroidota	0	0	0	0	0	0	0	0	0	0	0	0
213	NH1_3	d__Bacteria;p__Proteobacteria;c__Gammaproteobacteria;o__Xanthomonadales;f__Xanthomonadaceae;g__Lysobacter;s__	Proteobacteria	0	0	0	0	0	0	0	0	0	0	0	0
206	NH1_30	d__Bacteria;p__Proteobacteria;c__Gammaproteobacteria;o__Burkholderiales;f__Nitrosomonadaceae;g__Nitrosospira;s__	Proteobacteria	0	0	0	0	0	0	0	0	0	0	0	0
127	NH1_4	d__Bacteria;p__Bacteroidota;c__Bacteroidia;o__Cytophagales;f__Hymenobacteraceae;g__;s__	Bacteroidota	0	0	0	0	0	0	0	0	1	0	0	0
184	NH1_5	d__Bacteria;p__Myxococcota;c__Polyangia;o__Haliangiales;f__Haliangiaceae;g__;s__	Myxococcota	0	0	0	0	0	0	0	0	0	0	0	0
191	NH1_6	d__Bacteria;p__Planctomycetota;c__Phycisphaerae;o__UBA1161;f__UBA1161;g__;s__	Planctomycetota	0	0	0	0	0	0	0	0	0	0	0	0
219	NH1_8	d__Bacteria;p__Sumerlaeota;c__Sumerlaeia;o__Sumerlaeales;f__Sumerlaeaceae;g__;s__	Sumerlaeota	0	0	0	0	0	0	0	0	0	0	0	0
183	NH1_9	d__Bacteria;p__Gemmatimonadota;c__Gemmatimonadetes;o__SG8-23;f__RSA9;g__;s__	Gemmatimonadota	0	0	0	0	0	0	0	0	0	0	0	0
117	NH2_1	d__Bacteria;p__Bacteroidota;c__Bacteroidia;o__Chitinophagales;f__Chitinophagaceae;g__Flaviaesturariibacter;s__	Bacteroidota	0	0	0	0	0	0	0	0	0	0	1	0
218	NH2_10	d__Bacteria;p__Sumerlaeota;c__Sumerlaeia;o__Sumerlaeales;f__Sumerlaeaceae;g__;s__	Sumerlaeota	0	0	0	0	0	0	0	0	0	0	0	0
47	NH2_11	d__Bacteria;p__Actinobacteriota;c__Actinomycetia;o__Mycobacteriales;f__Geodermatophilaceae;g__;s__	Actinobacteriota	0	0	0	0	0	1	0	0	0	1	0	0
115	NH2_13	d__Bacteria;p__Bacteroidota;c__Bacteroidia;o__AKYH767;f__;g__;s__	Bacteroidota	0	0	0	0	0	0	0	0	0	0	0	0
217	NH2_14	d__Bacteria;p__Sumerlaeota;c__Sumerlaeia;o__Sumerlaeales;f__Sumerlaeaceae;g__;s__	Sumerlaeota	0	0	0	0	0	0	0	0	0	0	0	0
209	NH2_15	d__Bacteria;p__Proteobacteria;c__Gammaproteobacteria;o__Xanthomonadales;f__Xanthomonadaceae;g__;s__	Proteobacteria	0	0	0	0	0	0	0	0	0	0	0	0
214	NH2_16	d__Bacteria;p__Proteobacteria;c__Gammaproteobacteria;o__Xanthomonadales;f__Xanthomonadaceae;g__Lysobacter;s__	Proteobacteria	0	0	0	0	0	0	0	0	0	0	1	0
192	NH2_17	d__Bacteria;p__Planctomycetota;c__Phycisphaerae;o__UBA1161;f__UBA1161;g__;s__	Planctomycetota	0	0	0	0	0	0	0	0	0	0	0	0
205	NH2_2	d__Bacteria;p__Proteobacteria;c__Gammaproteobacteria;o__Burkholderiales;f__Burkholderiaceae;g__Herminiimonas;s__	Proteobacteria	0	0	0	0	0	0	0	0	0	0	0	0
198	NH2_20	d__Bacteria;p__Proteobacteria;c__Alphaproteobacteria;o__Rhodobacterales;f__Rhodobacteraceae;g__Amaricoccus;s__	Proteobacteria	0	0	0	0	0	0	0	0	0	0	1	0
26	NH2_24	d__Bacteria;p__Acidobacteriota;c__Vicinamibacteria;o__Vicinamibacterales;f__2-12-FULL-66-21;g__;s__	Acidobacteriota	0	0	0	0	0	0	0	0	0	1	0	0
133	NH2_3	d__Bacteria;p__Bdellovibrionota;c__Oligoflexia;o__Silvanigrellales;f__Silvanigrellaceae;g__;s__	Bdellovibrionota	0	0	0	0	0	0	0	0	0	0	0	0
18	NH2_35	d__Bacteria;p__Acidobacteriota;c__Blastocatellia;o__Pyrinomonadales;f__Pyrinomonadaceae;g__GCA-002050365;s__	Acidobacteriota	0	0	0	0	0	0	0	0	0	0	0	0
137	NH2_4	d__Bacteria;p__Chloroflexota;c__Ellin6529;o__CSP1-4;f__CSP1-4;g__Palsa-1032;s__	Chloroflexota	0	0	0	1	0	0	0	0	0	1	0	0
37	NH2_42	d__Bacteria;p__Actinobacteriota;c__Actinomycetia;o__Propionibacteriales;f__;g__;s__	Actinobacteriota	0	0	0	0	0	1	0	0	0	1	0	0
194	NH2_44	d__Bacteria;p__Planctomycetota;c__Phycisphaerae;o__UBA1161;f__UBA1161;g__;s__	Planctomycetota	0	0	0	0	0	0	0	0	0	0	0	0
134	NH2_5	d__Bacteria;p__Bdellovibrionota;c__Bacteriovoracia;o__Bacteriovoracales;f__Bacteriovoracaceae;g__UBA4096;s__	Bdellovibrionota	0	0	0	0	0	0	0	0	0	0	0	0
216	NH2_7	d__Bacteria;p__Sumerlaeota;c__Sumerlaeia;o__Sumerlaeales;f__Sumerlaeaceae;g__;s__	Sumerlaeota	0	0	0	0	0	0	0	0	0	0	0	0
103	NH2_8	d__Bacteria;p__Actinobacteriota;c__Thermoleophilia;o__Solirubrobacterales;f__Thermoleophilaceae;g__;s__	Actinobacteriota	0	0	0	0	0	0	0	0	0	1	0	0
89	NH2_9	d__Bacteria;p__Actinobacteriota;c__Thermoleophilia;o__Solirubrobacterales;f__Solirubrobacteraceae;g__;s__	Actinobacteriota	0	0	0	0	0	1	0	0	0	0	0	0
178	NH3_1	d__Bacteria;p__Gemmatimonadota;c__Gemmatimonadetes;o__SG8-23;f__SKRI01;g__;s__	Gemmatimonadota	0	0	0	0	0	0	0	0	0	0	0	0
40	NH3_10	d__Bacteria;p__Actinobacteriota;c__Actinomycetia;o__Actinomycetales;f__Dermatophilaceae;g__Ornithinicoccus;s__	Actinobacteriota	0	0	0	0	0	0	0	0	0	0	0	1
104	NH3_12	d__Bacteria;p__Actinobacteriota;c__Thermoleophilia;o__Solirubrobacterales;f__Thermoleophilaceae;g__;s__	Actinobacteriota	0	0	0	0	0	1	0	0	0	1	0	0
161	NH3_14	d__Bacteria;p__Deinococcota;c__Deinococci;o__Deinococcales;f__Trueperaceae;g__;s__	Deinococcota	0	0	0	0	0	0	0	0	0	0	1	0
150	NH3_15	d__Bacteria;p__Chloroflexota;c__Chloroflexia;o__Thermomicrobiales;f__UBA6265;g__;s__	Chloroflexota	0	0	0	0	0	1	0	0	0	0	0	0
41	NH3_17	d__Bacteria;p__Actinobacteriota;c__Actinomycetia;o__Euzebyales;f__;g__;s__	Actinobacteriota	1	0	0	0	0	0	0	0	0	1	0	1
126	NH3_18	d__Bacteria;p__Bacteroidota;c__Bacteroidia;o__Cytophagales;f__Cyclobacteriaceae;g__Rhodonellum;s__	Bacteroidota	0	0	0	0	0	0	0	0	0	0	0	0
160	NH3_2	d__Bacteria;p__Deinococcota;c__Deinococci;o__Deinococcales;f__;g__;s__	Deinococcota	0	0	0	0	0	0	0	0	0	0	1	0
145	NH3_23	d__Bacteria;p__Chloroflexota;c__Chloroflexia;o__Thermomicrobiales;f__CFX8;g__;s__	Chloroflexota	0	0	0	0	0	0	0	0	0	0	0	0
36	NH3_25	d__Bacteria;p__Actinobacteriota;c__Acidimicrobiia;o__Acidimicrobiales;f__UBA8139;g__;s__	Actinobacteriota	0	0	0	0	0	0	0	0	0	0	0	0
163	NH3_27	d__Bacteria;p__Deinococcota;c__Deinococci;o__Deinococcales;f__Trueperaceae;g__Truepera;s__	Deinococcota	0	0	0	0	0	0	0	0	0	0	0	0
35	NH3_3	d__Bacteria;p__Actinobacteriota;c__Acidimicrobiia;o__Acidimicrobiales;f__UBA8139;g__;s__	Actinobacteriota	0	0	0	0	0	1	0	0	0	1	0	1
33	NH3_33	d__Bacteria;p__Actinobacteriota;c__Acidimicrobiia;o__Acidimicrobiales;f__Ilumatobacteraceae;g__Desertimonas;s__	Actinobacteriota	0	0	0	0	0	1	0	0	0	0	0	0
109	NH3_4	d__Bacteria;p__Actinobacteriota;c__;o__;f__;g__;s__	Actinobacteriota	0	0	0	0	0	1	0	0	0	0	0	0
71	NH3_5	d__Bacteria;p__Actinobacteriota;c__Rubrobacteria;o__Rubrobacterales;f__Rubrobacteraceae;g__Rubrobacter_A;s__	Actinobacteriota	0	0	0	0	1	0	0	0	0	1	0	0
108	NH3_57	d__Bacteria;p__Actinobacteriota;c__Thermoleophilia;o__Solirubrobacterales;f__Thermoleophilaceae;g__;s__	Actinobacteriota	0	0	0	0	0	0	0	0	0	0	0	0
77	NH3_6	d__Bacteria;p__Actinobacteriota;c__Rubrobacteria;o__Rubrobacterales;f__Rubrobacteraceae;g__;s__	Actinobacteriota	0	0	0	0	0	0	0	0	0	1	0	0
162	NH3_7	d__Bacteria;p__Deinococcota;c__Deinococci;o__Deinococcales;f__Trueperaceae;g__Truepera;s__	Deinococcota	0	0	0	0	0	0	0	0	0	0	0	0
43	NH3_9	d__Bacteria;p__Actinobacteriota;c__Actinomycetia;o__Euzebyales;f__;g__;s__	Actinobacteriota	0	0	0	0	0	0	0	0	0	1	0	1
207	SS1_1	d__Bacteria;p__Proteobacteria;c__Gammaproteobacteria;o__Burkholderiales;f__Palsa-1005;g__PALSA-1003;s__	Proteobacteria	0	0	0	0	0	0	0	0	0	0	0	0
164	SS1_2	d__Bacteria;p__Dormibacterota;c__Dormibacteria;o__CF-121;f__CF-121;g__CF-13;s__	Dormibacterota	0	0	0	0	0	0	0	0	0	0	0	0
97	SS1_3	d__Bacteria;p__Actinobacteriota;c__Thermoleophilia;o__Solirubrobacterales;f__Solirubrobacteraceae;g__Palsa-465;s__	Actinobacteriota	0	0	0	0	0	0	0	0	0	1	0	0
7	SS1_4	d__Archaea;p__Thermoproteota;c__Nitrososphaeria;o__Nitrososphaerales;f__Nitrososphaeraceae;g__UBA10452;s__UBA10452 sp002501855	Thermoproteota	0	0	0	0	0	0	0	0	0	0	0	0
226	SS2_1	d__Bacteria;p__Verrucomicrobiota;c__Verrucomicrobiae;o__Chthoniobacterales;f__UBA10450;g__AV40;s__	Verrucomicrobiota	0	0	0	0	0	0	0	0	0	0	0	0
85	SS3_1	d__Bacteria;p__Actinobacteriota;c__Thermoleophilia;o__Gaiellales;f__Gaiellaceae;g__UBA5186;s__	Actinobacteriota	1	0	0	0	0	0	0	0	0	0	0	0
23	SS3_2	d__Bacteria;p__Acidobacteriota;c__Blastocatellia;o__Pyrinomonadales;f__Pyrinomonadaceae;g__UBA11741;s__	Acidobacteriota	0	0	0	0	0	0	0	0	0	1	0	0
113	SS3_4	d__Bacteria;p__Actinobacteriota;c__UBA4738;o__UBA4738;f__HRBIN12;g__;s__	Actinobacteriota	0	0	0	0	0	1	0	0	0	0	0	0
86	TP1_1	d__Bacteria;p__Actinobacteriota;c__Thermoleophilia;o__Solirubrobacterales;f__70-9;g__;s__	Actinobacteriota	0	0	0	0	0	0	0	0	0	0	0	0
79	TP1_2	d__Bacteria;p__Actinobacteriota;c__Thermoleophilia;o__Gaiellales;f__Gaiellaceae;g__;s__	Actinobacteriota	0	0	0	0	0	0	0	0	0	0	0	0
2	TP1_3	d__Archaea;p__Thermoproteota;c__Nitrososphaeria;o__Nitrososphaerales;f__Nitrososphaeraceae;g__UBA10452;s__	Thermoproteota	0	0	0	0	0	0	0	0	0	0	0	0
25	TP1_4	d__Bacteria;p__Acidobacteriota;c__Thermoanaerobaculia;o__UBA5704;f__UBA5704;g__UBA5704;s__	Acidobacteriota	0	0	0	0	0	0	0	0	0	0	0	0
114	TP1_5	d__Bacteria;p__Armatimonadota;c__Fimbriimonadia;o__Fimbriimonadales;f__Fimbriimonadaceae;g__;s__	Armatimonadota	0	0	0	0	0	0	0	0	0	0	0	0
107	TP1_8	d__Bacteria;p__Actinobacteriota;c__Thermoleophilia;o__Solirubrobacterales;f__Thermoleophilaceae;g__;s__	Actinobacteriota	0	0	0	0	0	0	0	0	0	0	0	0
84	TP1_9	d__Bacteria;p__Actinobacteriota;c__Thermoleophilia;o__Gaiellales;f__Gaiellaceae;g__VAXT01;s__	Actinobacteriota	0	0	0	0	0	0	0	0	0	0	0	0
80	TP2_4	d__Bacteria;p__Actinobacteriota;c__Thermoleophilia;o__Gaiellales;f__Gaiellaceae;g__VAXT01;s__	Actinobacteriota	0	0	0	0	0	0	0	0	0	0	0	0
20	TP2_5	d__Bacteria;p__Acidobacteriota;c__Blastocatellia;o__Pyrinomonadales;f__Pyrinomonadaceae;g__PSRF01;s__	Acidobacteriota	0	0	0	0	0	0	0	0	0	0	0	0
4	TP3_1	d__Archaea;p__Thermoproteota;c__Nitrososphaeria;o__Nitrososphaerales;f__Nitrososphaeraceae;g__Nitrososphaera;s__	Thermoproteota	0	0	0	0	0	0	0	0	0	0	0	0
111	TP3_2	d__Bacteria;p__Actinobacteriota;c__UBA4738;o__UBA4738;f__;g__;s__	Actinobacteriota	0	0	0	0	0	0	0	0	0	0	0	0
138	TP3_3	d__Bacteria;p__Chloroflexota;c__Ellin6529;o__P2-11E;f__CF-107;g__;s__	Chloroflexota	0	0	0	0	0	0	0	0	0	0	0	0
70	TP3_5	d__Bacteria;p__Actinobacteriota;c__Rubrobacteria;o__Rubrobacterales;f__Rubrobacteraceae;g__SIRX01;s__	Actinobacteriota	0	0	0	0	0	0	0	0	0	0	0	0
112	TP3_8	d__Bacteria;p__Actinobacteriota;c__UBA4738;o__UBA4738;f__;g__;s__	Actinobacteriota	0	0	0	0	0	0	0	0	0	0	0	0
5	TP3_9	d__Archaea;p__Thermoproteota;c__Nitrososphaeria;o__Nitrososphaerales;f__Nitrososphaeraceae;g__Nitrososphaera;s__	Thermoproteota	0	0	0	0	0	0	0	0	0	0	0	0
45	TR1_1	d__Bacteria;p__Actinobacteriota;c__Actinomycetia;o__Euzebyales;f__Euzebyaceae;g__Euzebya;s__	Actinobacteriota	0	0	0	0	0	0	0	0	0	0	0	1
180	TR1_10	d__Bacteria;p__Gemmatimonadota;c__Gemmatimonadetes;o__SG8-23;f__SKRI01;g__;s__	Gemmatimonadota	0	0	0	0	0	0	0	0	0	0	0	0
197	TR1_13	d__Bacteria;p__Proteobacteria;c__Alphaproteobacteria;o__Rhodobacterales;f__Rhodobacteraceae;g__Amaricoccus;s__	Proteobacteria	0	0	0	0	0	0	0	0	1	0	1	0
46	TR1_14	d__Bacteria;p__Actinobacteriota;c__Actinomycetia;o__Mycobacteriales;f__SCTD01;g__SCTD01;s__	Actinobacteriota	0	0	0	0	0	1	0	0	0	0	0	1
193	TR1_15	d__Bacteria;p__Planctomycetota;c__Phycisphaerae;o__UBA1161;f__UBA1161;g__;s__	Planctomycetota	0	0	0	0	0	0	0	0	0	0	0	0
44	TR1_18	d__Bacteria;p__Actinobacteriota;c__Actinomycetia;o__Euzebyales;f__;g__;s__	Actinobacteriota	0	0	0	0	0	0	0	0	0	1	0	0
74	TR1_21	d__Bacteria;p__Actinobacteriota;c__Rubrobacteria;o__Rubrobacterales;f__Rubrobacteraceae;g__SIRX01;s__	Actinobacteriota	0	0	0	0	0	0	0	0	0	1	0	0
124	TR1_23	d__Bacteria;p__Bacteroidota;c__Bacteroidia;o__Cytophagales;f__Cyclobacteriaceae;g__;s__	Bacteroidota	0	0	0	0	0	0	0	0	0	0	0	0
131	TR1_25	d__Bacteria;p__Bacteroidota;c__Bacteroidia;o__Flavobacteriales;f__Flavobacteriaceae;g__Gillisia;s__	Bacteroidota	0	0	0	0	0	0	0	0	0	0	0	0
199	TR1_27	d__Bacteria;p__Proteobacteria;c__Alphaproteobacteria;o__Sphingomonadales;f__Sphingomonadaceae;g__1-14-0-65-65-10;s__	Proteobacteria	0	0	0	0	0	0	0	0	0	0	0	0
215	TR1_29	d__Bacteria;p__Proteobacteria;c__Gammaproteobacteria;o__Xanthomonadales;f__Xanthomonadaceae;g__Lysobacter;s__	Proteobacteria	0	0	0	0	0	0	0	0	0	0	0	0
210	TR1_3	d__Bacteria;p__Proteobacteria;c__Gammaproteobacteria;o__Xanthomonadales;f__Xanthomonadaceae;g__Luteimonas;s__	Proteobacteria	0	0	0	0	0	0	0	0	0	0	1	0
75	TR1_30	d__Bacteria;p__Actinobacteriota;c__Rubrobacteria;o__Rubrobacterales;f__Rubrobacteraceae;g__SIRX01;s__	Actinobacteriota	0	0	0	0	0	0	0	0	0	0	0	0
187	TR1_34	d__Bacteria;p__Myxococcota;c__Polyangia;o__Polyangiales;f__SG8-38;g__;s__	Myxococcota	0	0	0	0	0	0	0	0	0	0	0	0
16	TR1_4	d__Bacteria;p__Acidobacteriota;c__Blastocatellia;o__Pyrinomonadales;f__Pyrinomonadaceae;g__QQUY01;s__	Acidobacteriota	0	0	0	0	0	0	0	0	0	1	0	0
201	TR1_5	d__Bacteria;p__Proteobacteria;c__Alphaproteobacteria;o__Sphingomonadales;f__Sphingomonadaceae;g__Sphingomonas_A;s__	Proteobacteria	0	0	0	0	0	0	0	0	0	0	0	0
90	TR1_8	d__Bacteria;p__Actinobacteriota;c__Thermoleophilia;o__Solirubrobacterales;f__Solirubrobacteraceae;g__;s__	Actinobacteriota	0	0	0	0	0	1	0	0	0	1	0	1
102	TR1_9	d__Bacteria;p__Actinobacteriota;c__Thermoleophilia;o__Solirubrobacterales;f__Solirubrobacteraceae;g__SEOHO-28;s__	Actinobacteriota	0	0	0	0	0	0	0	0	0	1	0	0
176	TR2_1	d__Bacteria;p__Gemmatimonadota;c__Gemmatimonadetes;o__SG8-23;f__SKRI01;g__;s__	Gemmatimonadota	0	0	0	0	0	0	0	0	0	0	0	0
73	TR2_10	d__Bacteria;p__Actinobacteriota;c__Rubrobacteria;o__Rubrobacterales;f__Rubrobacteraceae;g__Rubrobacter_A;s__	Actinobacteriota	0	0	0	0	0	0	0	0	0	0	0	0
30	TR2_12	d__Bacteria;p__Actinobacteriota;c__Acidimicrobiia;o__Acidimicrobiales;f__SIRW01;g__;s__	Actinobacteriota	0	0	0	0	0	1	0	0	0	0	0	0
181	TR2_13	d__Bacteria;p__Gemmatimonadota;c__Gemmatimonadetes;o__SG8-23;f__SKRI01;g__;s__	Gemmatimonadota	0	0	0	0	0	0	0	0	0	0	0	0
151	TR2_16	d__Bacteria;p__Chloroflexota;c__Chloroflexia;o__Thermomicrobiales;f__UBA6265;g__;s__	Chloroflexota	0	0	0	0	0	0	0	0	0	0	0	0
200	TR2_2	d__Bacteria;p__Proteobacteria;c__Alphaproteobacteria;o__Sphingomonadales;f__Sphingomonadaceae;g__Sphingomonas_A;s__	Proteobacteria	0	0	0	0	0	0	0	0	0	0	0	0
66	TR2_20	d__Bacteria;p__Actinobacteriota;c__Actinomycetia;o__Streptosporangiales;f__;g__;s__	Actinobacteriota	0	0	0	0	0	0	0	0	0	0	0	0
34	TR2_22	d__Bacteria;p__Actinobacteriota;c__Acidimicrobiia;o__Acidimicrobiales;f__Ilumatobacteraceae;g__Ilumatobacter;s__	Actinobacteriota	0	0	0	0	0	0	0	0	0	0	0	1
88	TR2_23	d__Bacteria;p__Actinobacteriota;c__Thermoleophilia;o__Solirubrobacterales;f__70-9;g__RSA11;s__	Actinobacteriota	0	0	0	0	0	0	0	0	0	0	1	0
106	TR2_26	d__Bacteria;p__Actinobacteriota;c__Thermoleophilia;o__Solirubrobacterales;f__Thermoleophilaceae;g__;s__	Actinobacteriota	1	0	0	0	0	1	0	0	0	1	0	0
177	TR2_3	d__Bacteria;p__Gemmatimonadota;c__Gemmatimonadetes;o__SG8-23;f__SKRI01;g__;s__	Gemmatimonadota	0	0	0	0	0	0	0	0	0	0	0	0
175	TR2_4	d__Bacteria;p__Gemmatimonadota;c__Gemmatimonadetes;o__SG8-23;f__SKRI01;g__;s__	Gemmatimonadota	0	0	0	0	0	0	0	0	0	0	0	0
146	TR2_5	d__Bacteria;p__Chloroflexota;c__Chloroflexia;o__Thermomicrobiales;f__UBA6265;g__;s__	Chloroflexota	0	0	0	0	0	0	0	0	0	0	0	0
87	TR2_6	d__Bacteria;p__Actinobacteriota;c__Thermoleophilia;o__Solirubrobacterales;f__70-9;g__;s__	Actinobacteriota	0	0	0	0	0	0	0	0	0	1	0	0
139	TR2_7	d__Bacteria;p__Chloroflexota;c__Ellin6529;o__QHBO01;f__QHBO01;g__QHBO01;s__	Chloroflexota	0	0	0	0	0	0	0	0	0	0	0	0
28	TR2_8	d__Bacteria;p__Actinobacteriota;c__Acidimicrobiia;o__Acidimicrobiales;f__SIRW01;g__;s__	Actinobacteriota	0	1	0	0	0	0	0	0	0	0	0	0
148	TR2_9	d__Bacteria;p__Chloroflexota;c__Chloroflexia;o__Thermomicrobiales;f__UBA6265;g__;s__	Chloroflexota	0	0	0	0	0	0	0	0	0	0	0	0
110	TR3_1	d__Bacteria;p__Actinobacteriota;c__UBA4738;o__;f__;g__;s__	Actinobacteriota	0	0	0	0	0	0	0	0	0	0	0	1
222	TR3_10	d__Bacteria;p__Verrucomicrobiota;c__Verrucomicrobiae;o__Chthoniobacterales;f__UBA10450;g__;s__	Verrucomicrobiota	0	0	0	0	0	0	0	0	0	0	0	0
179	TR3_11	d__Bacteria;p__Gemmatimonadota;c__Gemmatimonadetes;o__SG8-23;f__SKRI01;g__;s__	Gemmatimonadota	0	0	0	0	0	0	0	0	0	0	0	0
92	TR3_12	d__Bacteria;p__Actinobacteriota;c__Thermoleophilia;o__Solirubrobacterales;f__Solirubrobacteraceae;g__;s__	Actinobacteriota	1	0	0	0	0	1	0	0	0	0	0	0
69	TR3_13	d__Bacteria;p__Actinobacteriota;c__Rubrobacteria;o__Rubrobacterales;f__Rubrobacteraceae;g__SIRX01;s__	Actinobacteriota	0	0	0	0	0	0	0	0	0	0	0	0
141	TR3_14	d__Bacteria;p__Chloroflexota;c__Ellin6529;o__QHBO01;f__QHBO01;g__CF-167;s__	Chloroflexota	0	0	0	0	0	0	0	0	0	1	0	0
48	TR3_16	d__Bacteria;p__Actinobacteriota;c__Actinomycetia;o__Mycobacteriales;f__Geodermatophilaceae;g__;s__	Actinobacteriota	1	0	0	0	0	1	0	0	0	1	0	1
64	TR3_17	d__Bacteria;p__Actinobacteriota;c__Actinomycetia;o__Propionibacteriales;f__Nocardioidaceae;g__;s__	Actinobacteriota	0	0	0	0	0	0	0	0	0	0	0	0
82	TR3_19	d__Bacteria;p__Actinobacteriota;c__Thermoleophilia;o__Gaiellales;f__Gaiellaceae;g__GMQP-bins7;s__	Actinobacteriota	0	0	0	0	0	0	0	0	0	0	0	0
135	TR3_2	d__Bacteria;p__Chloroflexota;c__Ellin6529;o__CSP1-4;f__CSP1-4;g__Palsa-1032;s__	Chloroflexota	0	0	0	0	0	0	0	0	0	1	0	0
105	TR3_20	d__Bacteria;p__Actinobacteriota;c__Thermoleophilia;o__Solirubrobacterales;f__Thermoleophilaceae;g__;s__	Actinobacteriota	1	0	0	0	0	1	0	0	0	1	0	0
229	TR3_21	d__Bacteria;p__Verrucomicrobiota;c__Verrucomicrobiae;o__Chthoniobacterales;f__UBA10450;g__Palsa-1392;s__	Verrucomicrobiota	0	0	0	0	0	0	0	0	0	0	0	0
224	TR3_22	d__Bacteria;p__Verrucomicrobiota;c__Verrucomicrobiae;o__Chthoniobacterales;f__UBA10450;g__;s__	Verrucomicrobiota	0	0	0	0	0	0	0	0	0	0	0	0
63	TR3_23	d__Bacteria;p__Actinobacteriota;c__Actinomycetia;o__Propionibacteriales;f__;g__;s__	Actinobacteriota	0	0	0	0	0	0	0	0	0	1	0	1
136	TR3_3	d__Bacteria;p__Chloroflexota;c__Ellin6529;o__CSP1-4;f__CSP1-4;g__Palsa-1032;s__	Chloroflexota	0	0	0	0	0	0	0	0	0	1	0	0
61	TR3_4	d__Bacteria;p__Actinobacteriota;c__Actinomycetia;o__Nitriliruptorales;f__;g__;s__	Actinobacteriota	1	0	0	0	0	0	0	0	0	0	0	1
76	TR3_41	d__Bacteria;p__Actinobacteriota;c__Rubrobacteria;o__Rubrobacterales;f__Rubrobacteraceae;g__SIRX01;s__	Actinobacteriota	0	0	0	0	0	0	0	0	0	0	0	0
68	TR3_5	d__Bacteria;p__Actinobacteriota;c__Rubrobacteria;o__Rubrobacterales;f__Rubrobacteraceae;g__SIRX01;s__	Actinobacteriota	1	0	0	0	0	0	0	0	0	0	0	0
42	TR3_6	d__Bacteria;p__Actinobacteriota;c__Actinomycetia;o__Euzebyales;f__;g__;s__	Actinobacteriota	0	0	0	0	0	0	0	0	0	0	0	1
118	TR3_7	d__Bacteria;p__Bacteroidota;c__Bacteroidia;o__Chitinophagales;f__Chitinophagaceae;g__Palsa-955;s__	Bacteroidota	0	0	0	0	0	0	0	0	0	0	0	0
72	TR3_8	d__Bacteria;p__Actinobacteriota;c__Rubrobacteria;o__Rubrobacterales;f__Rubrobacteraceae;g__SIRX01;s__	Actinobacteriota	0	0	0	0	0	0	0	0	0	0	0	0
140	TR3_9	d__Bacteria;p__Chloroflexota;c__Ellin6529;o__QHBO01;f__QHBO01;g__;s__	Chloroflexota	0	0	0	1	0	0	0	0	0	1	0	0
